# Supplementary material for: Analysis of SINE Families B2, Dip, and Ves with Special Reference to Polyadenylation Signals and Transcription Terminators
Source: MDPI journal article supplement (doi:10.3390/ijms22189897), 2021-09-13
Supplement: s1 [file s1]

**Table S1.** Random B2a copies in genomes of 1 or 2 mouse strain(s)

| #  | Chromosome:<br>position   | Strains                | Tail with a terminator                                                                               | Terminator | A-rich<br>tail<br>length,<br>nt |
|----|---------------------------|------------------------|------------------------------------------------------------------------------------------------------|------------|---------------------------------|
| 1  | chr11:107581768-107581957 | C57BL_6NJ<br>NZO_HILtJ | TCTAAAAAAAAAAAAAAAAAAAAAAAAAGAAA                                                                     | TCT        | 30                              |
| 2  | chr17:24098897-24099087   | C57BL6NJ               | TCTTTAAAAAAAAAAAAAAAAAAAAAAAAAGAAAG                                                                  | TCTTT      | 34                              |
| 3  | chr8:22496673-22496881    | C57BL_6NJ<br>NZO_HILtJ | TCTTTAAAAAAAAACAAAAAAAAAAAA                                                                          | TCTTT      | 23                              |
| 4  | chr17:35851355-35851546   | C57BL_6NJ              | TCTTTAAAAAAAAAAAAAAAAAAAAAAAAA                                                                       | TCTTT      | 25                              |
| 5  | chr4:19614863-19615050    | C57BL_6NJ              | TCTTTAAAAAAAAATTAAAAAAAAACAAAAAAAAAAC<br>AAAAAAAAAAAAACAAAAACAAAAACAAAAACAAAAAA<br>AAAAAAAAAAAAAGAAA | TCTTT      | 95                              |
| 6  | chr14:47698157-47698350   | C57BL_6NJ              | TCTTTAAAAAAAAAAAAAAAAAAAAAAAAAGAGAACA                                                                | TCTTT      | 37                              |
| 7  | chr3:88684620-88684810    | C57BL_6NJ              | TCTTTAAAAAAAAAAAAA                                                                                   | TCTTT      | 13                              |
| 8  | chr4:108108803-108108995  | C57BL_6NJ              | TCTTTAAAAAAAAAAAAAAAAAAAA                                                                            | TCTTT      | 20                              |
| 9  | chr13:119787991-119788182 | C57BL_6NJ              | TCTTTAAAAAAAAAAAAAAAAAGAA                                                                            | TCTTT      | 21                              |
| 10 | chr16:30291696-30291892   | C57BL_6NJ              | TCTTAAAAAAATTGTCAAAAAAAAAAAAAAAAAA                                                                   | TCTT       | 30                              |
| 11 | chr19:45985835-45986024   | C57BL_6NJ              | TCTTTAAAAAAAAAAAAA                                                                                   | TCTTT      | 12                              |
| 12 | chr2:119206500-119206696  | C57BL_6NJ              | TCTTAAAAAAAAAAAAATAAAATAAAATAAAATATA                                                                 | TCTT       | 37                              |
| 13 | chr7:45359014-45359202    | C57BL_6NJ              | TCTTTAAAAAAAAAAAAAAAAAAAAAAAAAAAAAA<br>AAAAAAAAAAAAAA                                                | TCTTT      | 51                              |
| 14 | chr16:32207050-32207238   | C57BL_6NJ              | TCTTTAAAAAAAAAAAAAAAAAAAAAAAAAAAAAA<br>AAA                                                           | TCTTT      | 38                              |
| 15 | chr12:28830883-28831075   | C57BL_6NJ              | TTAAAAAAAAAAAAAAAAAAAA                                                                               | TT         | 19                              |
| 16 | chr9:71923639-71923826    | C57BL_6NJ              | TCTTTAAAAAAAAAAAAAA                                                                                  | TCTTT      | 16                              |
| 17 | chr17:29977257-29977448   | C57BL_6NJ              | TCTTTAAAAAAAAAAAAAAATCCAAATTTAAAAAA<br>AAAAAAAAAAAA                                                  | TCTTT      | 49                              |
| 18 | chr11:17975352-17975543   | C57BL_6NJ              | TCTTTAAAAAAAAAAAAAAAAAAAAAAAAAAAAAA<br>AAAAAAAAAAAA                                                  | TCTTT      | 47                              |
| 19 | chr7:38135206-38135392    | C57BL_6NJ<br>NZO_HILtJ | TCTTTAAAAAAA                                                                                         | TCTTT      | 8                               |
| 20 | chr3:89124648-89124838    | C57BL_6NJ              | TCAAAAAAAAAAAAAAGAAAAAAAAAAAA                                                                        | TC         | 33                              |
| 21 | chr4:122867123-122867318  | C57BL_6NJ              | TCTTTAAAAAAAAAAAAAA                                                                                  | TCTTT      | 17                              |
| 22 | chr12:101992989-101993180 | C57BL_6NJ              | TCTTTAAAAAAAAAAAAAA                                                                                  | TCTTT      | 18                              |
| 23 | chr2:153596013-153596202  | C57BL_6NJ<br>NZO_HILtJ | TCAAAAAAAAAAAAAAGAAAAAAAAAAAA                                                                        | TC         | 24                              |
| 24 | chr9:72779435-72779644    | C57BL_6NJ              | TCTTTAAAAAAAAAAAAAAAAAAAAAA                                                                          | TCTTT      | 26                              |
| 25 | chr1:172270895-172271085  | C57BL_6NJ              | TCTTTTAAAAAAAAAAAAAA                                                                                 | TCTTTT     | 16                              |
| 26 | chr8:71673632-71673822    | C57BL_6NJ              | TCTTAAAAACAAAAAAAAAAAAA                                                                              | TCTT       | 20                              |
| 27 | chr15:77546233-77546424   | C57BL_6NJ              | TCTTTAAAAAAAAAAAAATAATCTTTAAAAAAAAAAAA<br>AAAAAAAAAAAA                                               | TCTTT      | 32 (54)                         |
| 28 | chr11:31275722-31275914   | C57BL_6NJ              | TCTTTAAAAAAAAAAAAAA                                                                                  | TCTTT      | 19                              |
| 29 | chr4:133627440-133627635  | C57BL_6NJ<br>NZO_HILtJ | TTTAAAAAAAAAAAAA                                                                                     | TTT        | 14                              |
| 30 | chr11:69724024-69724214   | C57BL_6NJ              | TCTTTAAAAAAAAAAAAA                                                                                   | TCTTT      | 12                              |
| 31 | chr2:120329602-120329794  | C57BL_6NJ              | TCTTTAAAAAAAAAAAAAGAA                                                                                | TCTTT      | 15                              |
| 32 | chr17:55602395-           | C57BL_6NJ              | TCTTTAAAAAAAAAAAAAA                                                                                  | TCTTT      | 20                              |
