# Supplementary material for: Analysis of SINE Families B2, Dip, and Ves with Special Reference to Polyadenylation Signals and Transcription Terminators
Source: MDPI journal article supplement (doi:10.3390/ijms22189897), 2021-09-13
Supplement: s1 [file s1]

[illegible]

[illegible]

[illegible]

[illegible]

[illegible]
