# Supplementary material for: Analysis of SINE Families B2, Dip, and Ves with Special Reference to Polyadenylation Signals and Transcription Terminators
Source: MDPI journal article supplement (doi:10.3390/ijms22189897), 2021-09-13
Supplement: s1 [file s1]

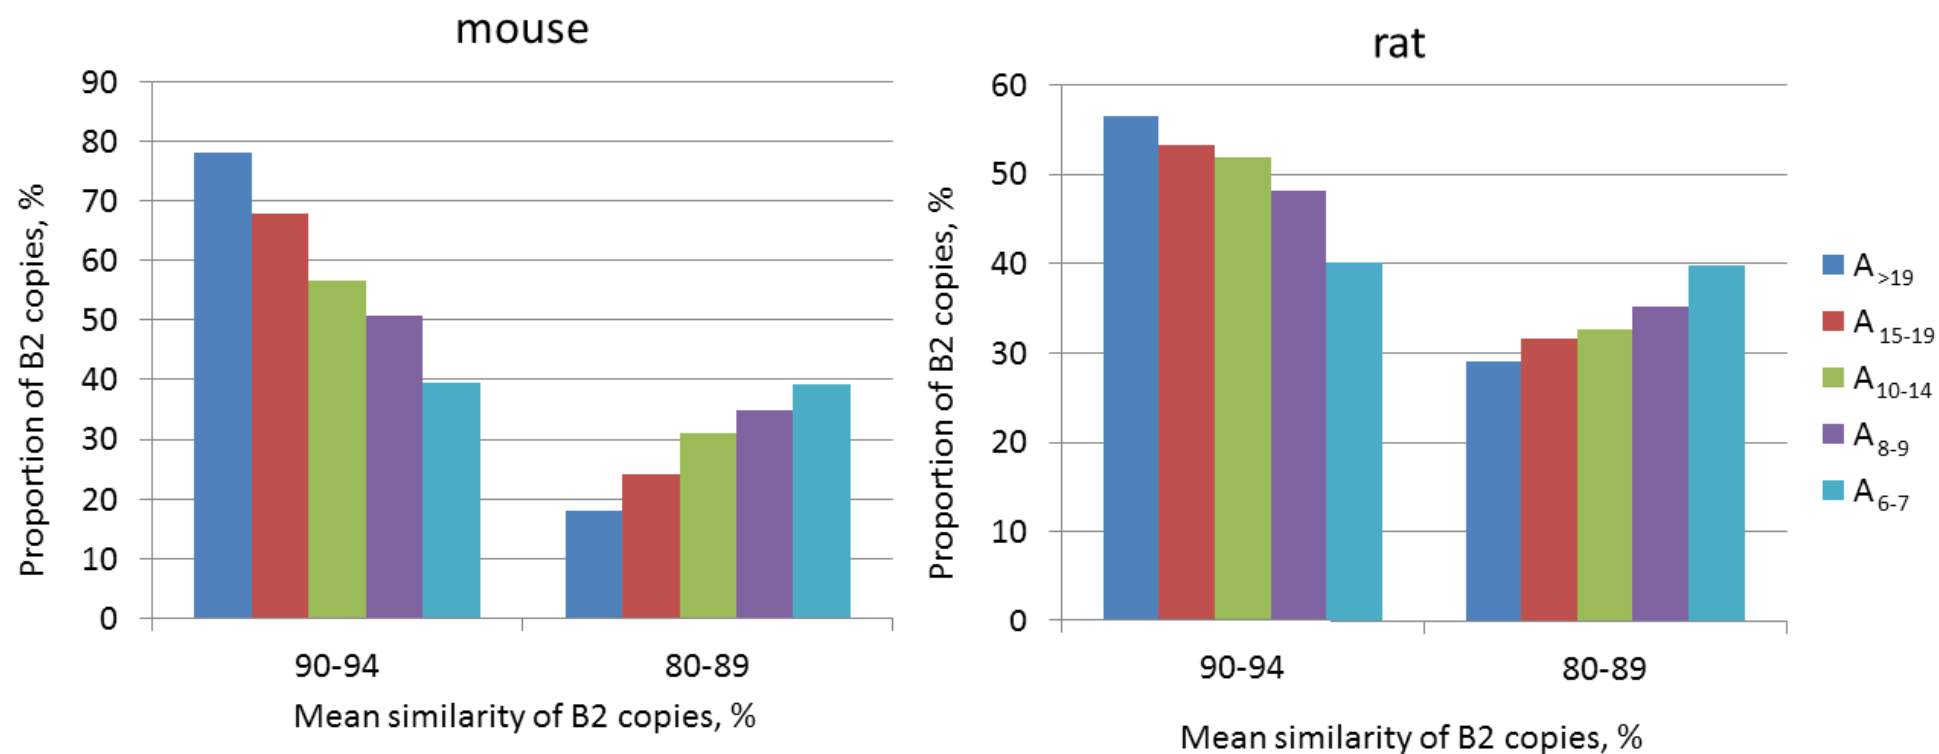

**Figure S3.** Inverse relationship between the length of oligo(A) tails and age of B2 copies in the mouse and rat genomes. The bars show the percentage of B2 copies with oligo(A) tails of different lengths for copies with the mean similarity of 90-94% and 80-90% (younger and older, respectively).
