# Supplementary material for: Analysis of SINE Families B2, Dip, and Ves with Special Reference to Polyadenylation Signals and Transcription Terminators
Source: MDPI journal article supplement (doi:10.3390/ijms22189897), 2021-09-13
Supplement: s1 [file s1]

chr4:108733470-108733658

|             |                |
|-------------|----------------|
| C57BL_6NJ   | ATCTTTTAAAAAAG |
| NZO_H1LtJ   | ATCTTTTAAAAAAG |
| NOD_ShiLtJ  | ATCTTTTAAAAAAG |
| FVB_NJ      | ATCTTTTAAAAAAG |
| DBA_2J      | ATCTTTTAAAAAAG |
| CBA_J       | ATCTTTTAAAAAAG |
| C3H_HeJ     | ATCTTTTAAAAAAG |
| AKR_J       | ATCTTTTAAAAAAG |
| BALB_cJ     | ATCTTTTAAAAAAG |
| A_J         | ATCTTTTAAAAAAG |
| LP_J        | ATCTTTTAAAAAAG |
| 129S1_SvImJ | ATCTTTTAAAAAAG |
| WSB_EiJ     | ATCTTTTAAAAAAG |
| CAST_EiJ    | ATCTT-AAAAAAG  |
| PWK_PhJ     | ATCTT-AAAAAAG  |
| SPRET_EiJ   | ATCTT-AAAAAAG  |

chr7:80888245-80888435

|             |                |
|-------------|----------------|
| C57BL_6NJ   | ATCTTTTAAAAAAT |
| NZO_H1LtJ   | ATCTTTTAAAAAAT |
| NOD_ShiLtJ  | ATCTTTTAAAAAAT |
| FVB_NJ      | ATCTTTTAAAAAAT |
| DBA_2J      | ATCTTTTAAAAAAT |
| CBA_J       | ATCTTTTAAAAAAT |
| C3H_HeJ     | ATCTTTTAAAAAAT |
| AKR_J       | ATCTTTTAAAAAAT |
| BALB_cJ     | ATCTTTTAAAAAAT |
| A_J         | ATCTTTTAAAAAAT |
| LP_J        | ATCTTTTAAAAAAT |
| 129S1_SvImJ | ATCTTTTAAAAAAT |
| WSB_EiJ     | ATCTTTTAAAAAAT |
| CAST_EiJ    | ATCTTT-AAAAAAT |
| PWK_PhJ     | ATCTTTAAAAAAT  |
| SPRET_EiJ   | ATCTTTTAAAAAAT |

chr15:84109854-84110050

|             |                 |
|-------------|-----------------|
| C57BL_6NJ   | ATCTTTTAAAAAAG  |
| NZO_H1LtJ   | ATCTTTTAAAAAAG  |
| NOD_ShiLtJ  | ATCTTTTAAAAAAG  |
| FVB_NJ      | ATCTTTTAAAAAAG  |
| DBA_2J      | ATCTTTTAAAAAA-G |
| CBA_J       | ATCTTTTAAAAAAG  |
| C3H_HeJ     | ATCTTTTAAAAAAG  |
| AKR_J       | ATCTTTTAAAAAAG  |
| BALB_cJ     | ATCTTTTAAAAAAG  |
| A_J         | ATCTTTTAAAAAAG  |
| LP_J        | ATCTTTTAAAAAAG  |
| 129S1_SvImJ | ATCTTTTAAAAAAG  |
| WSB_EiJ     | ATCTTTTAAAAAA-G |
| CAST_EiJ    | ATCTTTTAAAAAA-G |
| PWK_PhJ     | ATCTTTTAAAAAA-G |
| SPRET_EiJ   | ATCTTAAAAAAAAA  |

chr16:17080102-17080296

|             |                    |
|-------------|--------------------|
| C57BL_6NJ   | ATATTTTAAAAAAG     |
| NZO_H1LtJ   | ATATTTTAAAAAAG     |
| NOD_ShiLtJ  | ATATTTTAAAAAAG     |
| FVB_NJ      | ATATTTTAAAAAAG     |
| DBA_2J      | ATATTTTAAAAAAG     |
| CBA_J       | ATATTTTAAAAAAG     |
| C3H_HeJ     | ATATTTTAAAAAAG     |
| AKR_J       | ATATTTTAAAAAAG     |
| BALB_cJ     | ATATTTTAAAAAAG     |
| A_J         | ATATTTTAAAAAAG     |
| LP_J        | ATATTTTAAAAAAG     |
| 129S1_SvImJ | ATATTTTAAAAAAG     |
| WSB_EiJ     | ATATTTTAAAAAAG     |
| CAST_EiJ    | ATATTTTAAAAAA-G    |
| PWK_PhJ     | ATATTTAAAAAA-G     |
| SPRET_EiJ   | ATAAATCTTTAAAAAA-G |

chr12:83518163-83518353

|             |                                |
|-------------|--------------------------------|
| C57BL_6NJ   | ATTATTTTAAAAAAG                |
| NZO_H1LtJ   | ATTATTTTAAAAAAG                |
| NOD_ShiLtJ  | ATTATTTTAAAAAAG                |
| FVB_NJ      | ATTATTTTAAAAAAG                |
| DBA_2J      | ATTATTTTAAAAAAG                |
| CBA_J       | ATTATTTTAAAAAAG                |
| C3H_HeJ     | ATTATTTTAAAAAAG                |
| AKR_J       | ATTATTTTAAAAAAG                |
| BALB_cJ     | ATTATTTTAAAAAAG                |
| A_J         | ATTATTTTAAAAAAG                |
| LP_J        | ATTATTTTAAAAAAG                |
| 129S1_SvImJ | ATTATTTTAAAAAAG                |
| WSB_EiJ     | ATTATTTTAAAAAAG                |
| CAST_EiJ    | ATTATTTTAAAAAAG                |
| PWK_PhJ     | ATATTTT <del>TT</del> AAAAAAG  |
| SPRET_EiJ   | ATATTTT <del>TTT</del> AAAAAAG |

chr11:97116609-97116793

|             |                                 |
|-------------|---------------------------------|
| C57BL_6NJ   | ATTAATTTTAAAAAAG                |
| NZO_H1LtJ   | ATTAATTTTAAAAAAG                |
| NOD_ShiLtJ  | ATTAATTTTAAAAAAG                |
| FVB_NJ      | ATTAATTTTAAAAAAG                |
| DBA_2J      | ATTAATTTTAAAAAAG                |
| CBA_J       | ATTAATTTTAAAAAAG                |
| C3H_HeJ     | ATTAATTTTAAAAAAG                |
| AKR_J       | ATTAATTTTAAAAAAG                |
| BALB_cJ     | ATTAATTTTAAAAAAG                |
| A_J         | ATTAATTTTAAAAAAG                |
| LP_J        | ATTAATTTTAAAAAAG                |
| 129S1_SvImJ | ATTAATTTTAAAAAAG                |
| WSB_EiJ     | ATTAATTTTAAAAAAG                |
| CAST_EiJ    | ATTAATTTTAAAAAAG                |
| PWK_PhJ     | ATTAATTTTAAAAAAG                |
| SPRET_EiJ   | ATTAATTTT <del>TT</del> AAAAAAG |

chr15:5102826-5103034

|             |                               |
|-------------|-------------------------------|
| C57BL_6NJ   | ATCTTTAAAAAAAT                |
| NZO_H1LtJ   | ATCTTTAAAAAAAT                |
| NOD_ShiLtJ  | ATCTTTAAAAAAAT                |
| FVB_NJ      | ATCTTTAAAAAAAT                |
| DBA_2J      | ATCTTTAAAAAAAT                |
| CBA_J       | ATCTTTAAAAAAAT                |
| C3H_HeJ     | ATCTTTAAAAAAAT                |
| AKR_J       | ATCTTTAAAAAAAT                |
| BALB_cJ     | ATCTTTAAAAAAAT                |
| A_J         | ATCTTTAAAAAAAT                |
| LP_J        | ATCTTTAAAAAAAT                |
| 129S1_SvImJ | ATCTTTAAAAAAAT                |
| WSB_EiJ     | ATCTTTAAAAAAAT                |
| CAST_EiJ    | ATCTTTAAAAAAAT                |
| PWK_PhJ     | ATCTTTAAAAAAAT                |
| SPRET_EiJ   | ATCTTT <del>TT</del> AAAAAAAT |

chr1:59793467-59793649

|             |                               |
|-------------|-------------------------------|
| C57BL_6NJ   | ATCTTTAAAAAAAAG               |
| NZO_H1LtJ   | ATCTTTAAAAAAAAG               |
| NOD_ShiLtJ  | ATCTTTAAAAAAAAG               |
| FVB_NJ      | ATCTTTAAAAAAAAG               |
| DBA_2J      | ATCTTTAAAAAAAAG               |
| CBA_J       | ATCTTTAAAAAAAAG               |
| C3H_HeJ     | ATCTTTAAAAAAAAG               |
| AKR_J       | ATCTTTAAAAAAAAG               |
| BALB_cJ     | ATCTTTAAAAAAAAG               |
| A_J         | ATCTTTAAAAAAAAG               |
| LP_J        | ATCTTTAAAAAAAAG               |
| 129S1_SvImJ | ATCTTTAAAAAAAAG               |
| WSB_EiJ     | ATCTTTAAAAAAAAG               |
| CAST_EiJ    | ATCTTTAAAAAAAAG               |
| PWK_PhJ     | ATCTTTAAAAAAA--G              |
| SPRET_EiJ   | ATCTTT <del>TTT</del> AAAAA-G |

chrX:102410389-102410581

|             |                  |
|-------------|------------------|
| C57BL_6NJ   | ATCTTTTAAAAAAAAG |
| NZO_H1LtJ   | ATCTTTTAAAAAAAAG |
| NOD_ShiLtJ  | ATCTTTTAAAAAAAAG |
| FVB_NJ      | ATCTTTTAAAAAAAAG |
| DBA_2J      | ATCTTTTAAAAAAAAG |
| CBA_J       | ATCTTTTAAAAAAAAG |
| C3H_HeJ     | ATCTTTTAAAAAAAAG |
| AKR_J       | ATCTTTTAAAAAAAAG |
| BALB_cJ     | ATCTTTTAAAAAAAAG |
| A_J         | ATCTTTTAAAAAAAAG |
| LP_J        | ATCTTTTAAAAAAAAG |
| 129S1_SvImJ | ATCTTTTAAAAAAAAG |
| WSB_EiJ     | ATCTTTTAAAAAAAAG |
| CAST_EiJ    | ATCTTTTAAAAAAAAG |
| PWK_PhJ     | ATCTTTTAAAAAAAAG |
| SPRET_EiJ   | -----            |

chr14:52153728-52153928

|             |               |
|-------------|---------------|
| C57BL_6NJ   | CTCTTAAAAAAG  |
| NZO_H1LtJ   | ATCTTTAAAAAAG |
| NOD_ShiLtJ  | ATCTTTAAAAAAG |
| FVB_NJ      | ATCTTTAAAAAAG |
| DBA_2J      | ATCTTTAAAAAAG |
| CBA_J       | ATCTTTAAAAAAG |
| C3H_HeJ     | ATCTTTAAAAAAG |
| AKR_J       | ATCTTTAAAAAAG |
| BALB_cJ     | ATCTTTAAAAAAG |
| A_J         | ATCTTTAAAAAAG |
| LP_J        | ATCTTTAAAAAAG |
| 129S1_SvImJ | ATCTTTAAAAAAG |
| WSB_EiJ     | NNCTTTAAAAAAG |
| CAST_EiJ    | ATCTTTAAAAAAG |
| PWK_PhJ     | ATCTTTAAAAAAG |
| SPRET_EiJ   | ATCTTTAAAAAAG |

chr14:62928931-62929124

|             |                 |
|-------------|-----------------|
| C57BL_6NJ   | ATGTTTAAAAAAAAG |
| NZO_H1LtJ   | ATGTTTAAAAAAAAG |
| NOD_ShiLtJ  | ATGTTTAAAAAAAAG |
| FVB_NJ      | ATGTTTAAAAAAAAG |
| DBA_2J      | ATGTTTAAAAAAAAG |
| CBA_J       | ATGTTTAAAAAAAAG |
| C3H_HeJ     | ATGTTTAAAAAAAAG |
| AKR_J       | ATGTTTAAAAAAAAG |
| BALB_cJ     | ATGTTTAAAAAAAAG |
| A_J         | ATGTTTAAAAAAAAG |
| LP_J        | ATGTTTAAAAAAAAG |
| 129S1_SvImJ | ATGTTTAAAAAAAAG |
| WSB_EiJ     | ATGTTTAAAAAAAAG |
| CAST_EiJ    | ATGTTTAAAAAAAAG |
| PWK_PhJ     | ATTTTTAAAAAAAAG |
| SPRET_EiJ   | ATGTTTAAAAAAAAG |

chr15:84109854-84110050

|             |                     |
|-------------|---------------------|
| C57BL_6NJ   | ATCTTTTTTTAAAAAAAAG |
| NZO_H1LtJ   | ATCTTTTTTTAAAAAAAAG |
| NOD_ShiLtJ  | ATCTTTTTTTAAAAAAAAG |
| FVB_NJ      | ATCTTTTTTTAAAAAAAAG |
| DBA_2J      | ATCTTTTTTTAAAAAAA-G |
| CBA_J       | ATCTTTTTTTAAAAAAAAG |
| C3H_HeJ     | ATCTTTTTTTAAAAAAAAG |
| AKR_J       | ATCTTTTTTTAAAAAAAAG |
| BALB_cJ     | ATCTTTTTTTAAAAAAAAG |
| A_J         | ATCTTTTTTTAAAAAAAAG |
| LP_J        | ATCTTTTTTTAAAAAAAAG |
| 129S1_SvImJ | ATCTTTTTTTAAAAAAAAG |
| WSB_EiJ     | ATCTTTTTTTAAAAAAA-G |
| CAST_EiJ    | ATCTTTTTTTAAAAAAA-G |
| PWK_PhJ     | ATCTTTTTTTAAAAAAA-G |
| SPRET_EiJ   | ATCTTAAAAAAAAAAAAA- |

chr2:9900243-9900434

|             |                     |
|-------------|---------------------|
| C57BL_6NJ   | ATCTTTAAAAAAAAAAAG  |
| NZO_HlLtJ   | ATCTTTAAAAAAAAAAAG  |
| NOD_ShiLtJ  | ATCTTTAAAAAAAAAAAG  |
| FVB_NJ      | ATCTTTAAAAAAAAAAAG  |
| DBA_2J      | ATCTTTAAAAAAAAAAAG  |
| CBA_J       | ATCTTTAAAAAAAAAAAG  |
| C3H_HeJ     | ATCTTTAAAAAAAAAAAG  |
| AKR_J       | ATCTTTAAAAAAAAAAAG  |
| BALB_cJ     | ATCTTTAAAAAAAAAAAG  |
| A_J         | ATCTTTAAAAAAAAAAAG  |
| LP_J        | ATCTTTAAAAAAAAAAAG  |
| 129S1_SvImJ | ATCTTTAAAAAAAAAAAG  |
| WSB_EiJ     | ATCTTTAAAAAAAAAAAG  |
| CAST_EiJ    | ATCTTTAAAAAAAA---G  |
| PWK_PhJ     | ATCTTTAAAAAAAAAGAAG |
| SPRET_EiJ   | ATATTAAAAAAAAAA---G |

chr11:14117171-14117367

|             |                  |
|-------------|------------------|
| C57BL_6NJ   | ATTTAAAAAAAAAAG  |
| NZO_HlLtJ   | ATTTAAAAAAAAAAG  |
| NOD_ShiLtJ  | ATTTAAAAAAAAAAG  |
| FVB_NJ      | ATTTAAAAAAAAAAG  |
| DBA_2J      | ATTTAAAAAAAAAAG  |
| CBA_J       | ATTTAAAAAAAAAAG  |
| C3H_HeJ     | ATTTAAAAAAAAAAG  |
| AKR_J       | ATTTAAAAAAAAAAG  |
| BALB_cJ     | ATTTAAAAAAAAAAG  |
| A_J         | ATTTAAAAAAAAAAG  |
| LP_J        | ATTTAAAAAAAAAAG  |
| 129S1_SvImJ | ATTTAAAAAAAAAAG  |
| WSB_EiJ     | ATTTAAAAAAAAAAG  |
| CAST_EiJ    | ATTTAAAAAAA--G   |
| PWK_PhJ     | ATTTAAAAAAAAAAG  |
| SPRET_EiJ   | ATTTTAAAAAAAAAAG |

chr1:12272434-12272614

|             |                 |
|-------------|-----------------|
| C57BL_6NJ   | ATCTTTTAAAAAAAT |
| NZO_HlLtJ   | ATCTTTTAAAAAAAT |
| NOD_ShiLtJ  | ATCTTTTAAAAAAAT |
| FVB_NJ      | ATCTTTTAAAAAAAT |
| DBA_2J      | ATCTTTTAAAAAAAT |
| CBA_J       | ATCTTTTAAAAAAAT |
| C3H_HeJ     | ATCTTTTAAAAAAAT |
| AKR_J       | ATCTTTTAAAAAAAT |
| BALB_cJ     | ATCTTTTAAAAAAAT |
| A_J         | ATCTTTTAAAAAAAT |
| LP_J        | ATCTTTTAAAAAAAT |
| 129S1_SvImJ | ATCTTTTAAAAAAAT |
| WSB_EiJ     | ATCTTTTAAAAAAAT |
| CAST_EiJ    | -----           |
| PWK_PhJ     | -----           |
| SPRET_EiJ   | -----           |

chr16:17919203-17919386

|             |                   |
|-------------|-------------------|
| C57BL_6NJ   | ATCTTTTTTAAAAAAAG |
| NZO_HlLtJ   | ATCTTTTTTAAAAAAAG |
| NOD_ShiLtJ  | ATCTTTTTTAAAAAAAG |
| FVB_NJ      | ATCTTTTTTAAAAAAAG |
| DBA_2J      | ATCTTTTTTAAAAAAAG |
| CBA_J       | ATCTTTTTTAAAAAAAG |
| C3H_HeJ     | ATCTTTTTTAAAAAAAG |
| AKR_J       | ATCTTTTTTAAAAAAAG |
| BALB_cJ     | ATCTTTTTTAAAAAAAG |
| A_J         | ATCTTTTTTAAAAAAAG |
| LP_J        | ATCTTTTTTAAAAAAAG |
| 129S1_SvImJ | ATCTTTTTTAAAAAAAG |
| WSB_EiJ     | ATCTTTTTTAAAAAAAG |
| CAST_EiJ    | ATCTTTT-AAAAAAAG  |
| PWK_PhJ     | ATCTTTTTTAAAAAAAG |
| SPRET_EiJ   | -----             |

chr13:17991337-17991525

|             |                      |
|-------------|----------------------|
| C57BL_6NJ   | ATCTTTTAAAGAAAAAAG   |
| NZO_H1LtJ   | ATCTTTTAAAGAAAAAAG   |
| NOD_ShiLtJ  | ATCTTTTAAAGAAAAAAG   |
| FVB_NJ      | ATCTTT-AAAAAAAAAAG   |
| DBA_2J      | ATCTTTTAAAGAAAAAAG   |
| CBA_J       | ATCTTTTAAAGAAAAAAG   |
| C3H_HeJ     | ATCTTTTAAAGAAAAAAG   |
| AKR_J       | ATCTTTTAAAGAAAAAAG   |
| BALB_cJ     | ATCTTTTAAAGAAAAAAG   |
| A_J         | ATCTTTTAAAGAAAAAAG   |
| LP_J        | NTCTTTTAAAGAAAAAAG   |
| 129S1_SvImJ | ATCTTTTAAAGAAAAAAG   |
| WSB_EiJ     | ATCTTTTAAAGAAAAAAG   |
| CAST_EiJ    | ATCTTTTAAAGAAAAAAG   |
| PWK_PhJ     | ATCTTT---AAAAAAAAAAG |
| SPRET_EiJ   | -----                |

**Figure S5.** Examples of polymorphic terminators in B2 copies. Original terminator nucleotides are in blue and additional T residues are in red. Positions of B2 copies in the mouse genome (strain C57BL/6B, assembly GRCm38/mm10 ) are shown above. **SPRET\_EiJ** – *Mus spretus*. **WSB\_EiJ**, **CAST\_EiJ**, and **PWK\_PhJ** are *Mus musculus* subspecies: *M. m. domesticus*, *M.m. castaneus*, *M. m. musculus*, respectively
