# Supplementary material for: Analysis of SINE Families B2, Dip, and Ves with Special Reference to Polyadenylation Signals and Transcription Terminators
Source: MDPI journal article supplement (doi:10.3390/ijms22189897), 2021-09-13
Supplement: s1 [file s1]

$\beta$  signal

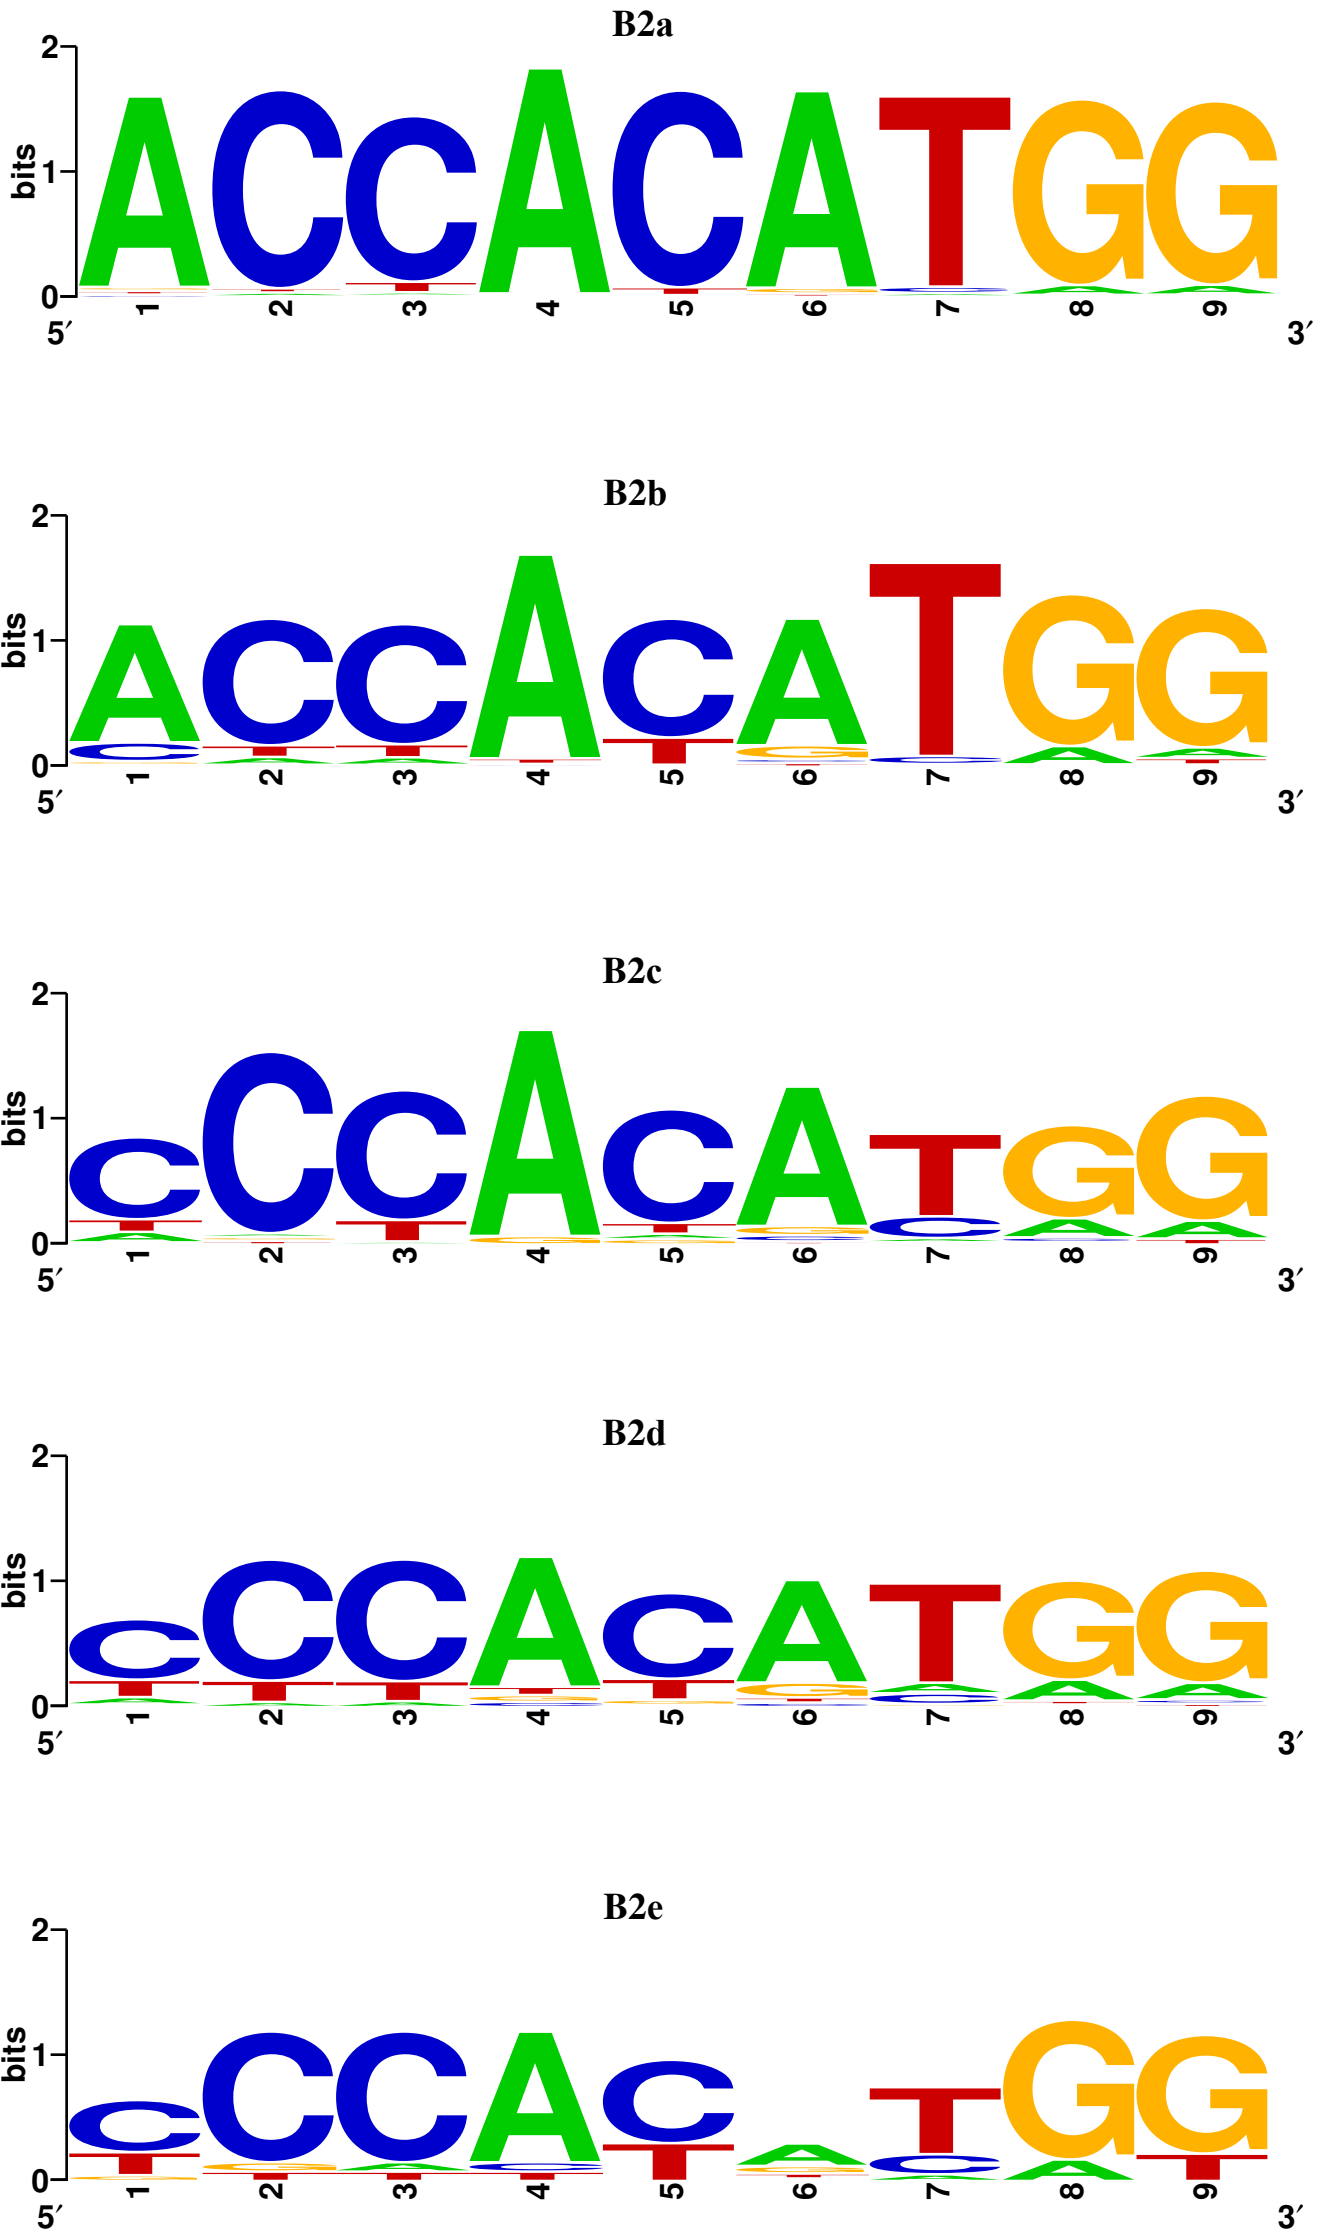

$\tau$  signal

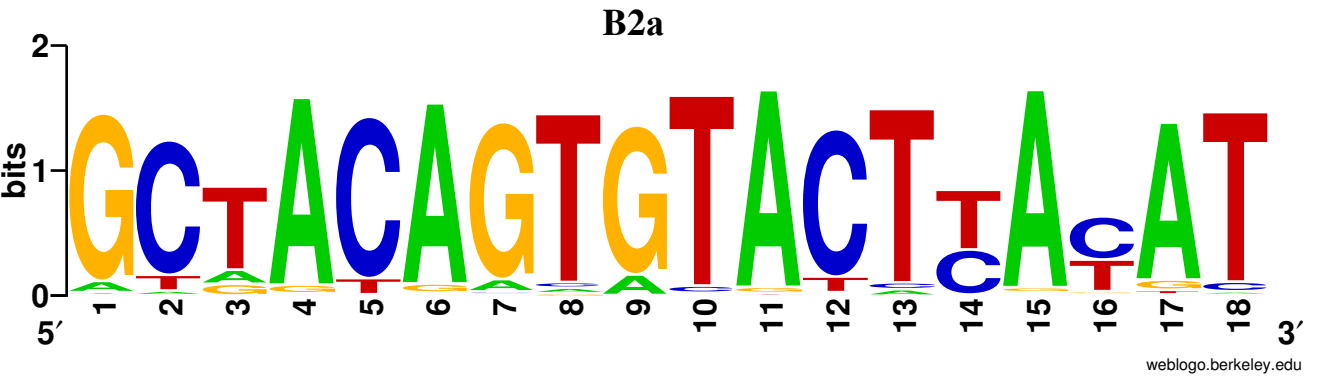

Figure S1. Conservation of  $\beta$  signal in B2 copies of five subfamilies and  $\tau$  signal in B2a subfamily from the *M. musculus* genome. Sequence logos were generated by WebLogo 3.1.
