# Supplementary material for: Analysis of SINE Families B2, Dip, and Ves with Special Reference to Polyadenylation Signals and Transcription Terminators
Source: MDPI journal article supplement (doi:10.3390/ijms22189897), 2021-09-13
Supplement: s1 [file s1]

PVKW010006534.1 : AAATTTGATATGCATTTTAAATATCTACCAAGGAGGCTGGAGAGATGGCTTAGC---GGTTAAGGCGCTGCGCTGCTAAGCCTAAGAAACAGGTTCCAAATCT-----CCAGGTCCCACATTTTAG  
 PVKW010018780.1 : TATAAGAATGTTTAAACAAATTTAAAGAGGATAGGGCTGGAGAGATGGCTTAGC---GGTTAAGGTCCTGCGCTGCTAAGCCTAAGAAACCGGTTCCAAATCT-----CCAGGTCCCACATTTTAG  
 PVKW010013669.1 : TGGCACAATGTAGTTTAAAGATGAGGAGAGGGCTGAGAGATGGCTTAGC---GGTTAAGGTCCTGCGCTGCTAAGCCTAAGAAACCGGTTCCAAATCT-----CCAGGTCCCACATTTTAG  
 PVKW010000122.1 : GAAGATAACATTTGAATAAGCAATCTGAATTTCTGGGCTGGAGAGATGGCTTAGC---GATTAAGGCGCTGCGCTGCTAAGCCTAAGAAATGCTGTTCCAAATCT-----CCAGGTCCCACATTTTAG  
 PVKW010004445.1 : TGATTTTTTATTCATATAAAACGAAACATGTCTGGGCTGGAGAGATGGCTTAGC---AGTTAAGGCGCTGCGCTGCTAAGCCTAAGAAACCGAGTTCCAAATCT-----CCAGGTCCCACATTTTAG  
 PVKW010031174.1 : TTCAGAAGCTGAGTGTAAAGAGTATACAATTTGGGCTGAGAGATGGCTTAGC---CGTTAAGGTCCTGCGCTGCTAAGCCTAAGAAAGCCAGTTCCAAATTT-----CCAGGTCCCACATTTTAG  
 PVKW010009668.1 : ATTTTAAAAAATTAATTTTAAATATAAAATAAGGCTGGAGAGATGGCTTAGC---GTTTAAGGCGCTGCGCTGCTAAGCCTAAGAAACCGGTTCCAAATCT-----CCAGGTCCCACATTTTAG  
 PVKW010006270.1 : GTCTCGAGTGATGAGGATGTAAACAGCCAACTGGGCTGGAGAGATGGCTTAGC---TGTTAAGGCGCTGCGCTGCTAAGCCTAAGAAAGCTGTTCCAAATCT-----CCAGGTCCCACATTTAG  
 PVKW010010393.1 : TTCCCTTTTATTTTTTTTAAAGCAGGGCTCGGACTGGAGAAATGGCTTAGC---GGTTAAGGCGCTGCGCTGCTAAGCCTAAGAAAGCTGTTCCAAATCT-----CCAGGTCCCACATTTTAG  
 PVKW010031684.1 : GATGGCTGGGTGGTTAAAGTGCTGGTTTAAAGAGGCTGGAGAGATGACTTAGC---GGTTAAGGCGCTGCGCTGCTGGAAGCCTAAGAAAGCCCGTTTGAATTCT-----CCAGGTCCCACATTTTAG  
 PVKW010056884.1 : TTAGCACAATCAATATCATTTAAAGCAATGTCAAGCTGGAGAG---GGCTAGT---GGTTAGGCGCTGCGCTGCTGCAAGCCTCAGAAAGCCCTATTCGATTCT-----CCAGATCCCACATTTTAG  
 PVKW010032239.1 : TGGACTTCTAATCTCAAGATATGAGGTATTTGGGCTGGAGAGATGGCTTAGC---GGTTAAGGCGCTGCGCTGCTAAGCCTAAGAAACTCGGTTCCAAATCT-----TCAAGTCCCACGTTTAG  
 PVKW010023471.1 : TTTAACCTTTAAAAAAGGTTCTCTTTTTTTGGAGGGCTGGAGAGATGGCTTAGA---GGTTAAGGTCCTGCGCTGCTAAGCCTAAGAAACATGTTCCAAATCT-----CCAGGTCCCACGTTTAG  
 PVKW010017375.1 : CCGTTCCAGTGTCTTTAAAAACACAGGCCAGGGCTGGAGAGATGGCTTAGA---GGTTAAGGCACTGCGCTGCTAAGCCTAAGAAACCGGTTCCAAATCT-----CCAGGTCCCACGTTTAG  
 PVKW010014973.1 : TAAAAAAATTTCAACAGCAAAATGGGCCACTGAGGGCTGGAGAGATGGCTTAG---AGTTTAGGCGCTGCGCTGCTAAGCCTAAGAAACCTGTTCCAAATCTCCAGCAGTTCCAATCTCCAGGTCCCACGTTTAG  
 PVKW010012032.1 : CTGAAGTCAATGATCATATAAAACGTGCGGAGGCTGGAGAGATGGCTTAGC---AGTTAAGGCGCTGCGCTGCTAAGCCTAAGAAACCTGTTCCAAATCTCCAGGGTTTCCAATCTCCAGGTCCCACGTTTAAA  
 PVKW010037207.1 : TGAAAGCCTTAAAAAAGAGCTGAGGGCTGGAGAGATGCTTAGG---GGTTAAGGCACTGCGCTGCTAAGCCTAAGAAACAGAGTTCTAATCTCCAGCGGTTCCAATCTCCAGGTCCCACGTTTAG  
 PVKW010001988.1 : TTTCTGAGGCACTATAAAACATTAATTTATTTGGGCTGGAGAGATGGCTTAGC---GGTTAAGGCACTGCGCTGCTAAGCCTAAGAAACTCTGTTCCAAATCTCCAGCAGTTCCAATCTCCAGGTCCCACGTTTAG  
 PVKW010021498.1 : GTCAGTTCAAATCATTTTAAACATAAAAAATTTGGGCTGAGAGATGGCTTAGG---GGTTAAGGCGCTGCGCTGCTAAGCCTAAGAAAGCTGTTCCAAATCTCCAGCGGTTCCAATCTCCAGGTCTCAGGTTTAG  
 PVKW010000820.1 : GCTACGTAAATCTCATCTAAAAAAGAGGCTGAGCTGAGAGATGGCTTAGC---GGTTAAGGCGCTGCGCTGCTAAGCCTAAGAAACCTGTTCCAAATCTCCAGCGGTTCCAATCTCCAGGTCCCACGTTTAG  
 PVKW010001600.1 : GCTTGCTTTTCTTATGTGAAGCCAATTTGAGGGCTGGAGAGATGGCTTAGC---GGTTAAGGCACTTCTCTGCTAAGCCTAAGAAACCTGTTCCAAATCTCCAGCAGTTCCAATCTCCAGGTCCCACGTTTAG  
 PVKW010002752.1 : GTTCGATTAACATTTA---AGTTAGCATATAAAGGCTGGAGAGATGGTTTAGA---GATTAAGGCGCTGCGCTGCTAAGCCTAAGAAACCTGTTCCAGTCTCCAGCAGTTCCCATCTCCAGGTCCCACGTTTAG  
 PVKW010000576.1 : TGTGCACAAAAGTAATATAAAAGACTATCTCGGCTGGAGAGATGGCTTAGT---GTTTAGGCACTGCGCTGCTAAGCCTAAGAAAGCTGTTTCAATTTCCAGCGATTCCAATCTCCAGGTCCCACGTTTAG  
 PVKW010006672.1 : GCAAGACCAAGTGTGTAAGAAATGTTGGTTAGGCTGGAGAGATGGCTTAGC---AGTTAAGGCGCTGCGCTGCTAAGCCTAAGAAAGCTGTTCCAAATCTCCAGCGGTTCCAATCTCCAGGTCCCACGTTTAG  
 PVKW010003591.1 : TATCAAAAAAAGAAAAAAGAAAAAAGATAGGGCTGGAGAGATGGCTTAGC---GGTTAAGGCACTGCGCTGCTAAGCCTAAGAAAGCTGTTCCAAATCTCCAGCGGTTCCAATCTCCAGGTCCCACGTTTAG  
 PVKW010025398.1 : AGAGAGAAATAAAAAACCTATAAAAGCTTCCAGGGCTGGAGAGCTGGCTTAGT---GGTTAAGGCGCTGCGCTGCTAAGCCTAAGAAAGCTGTTCCAAATCTATAGCGGTTCCAATCTCCAGGTCCCACGTTTAG  
 PVKW010004907.1 : GCAATTCCTTGCATTTTTTAAAGCTGCTTCTGGGCTGGAGAGATGGCTTAGC---GGTTAAGGTCCTGCGCTGCTAAGCCTAAGAAAGCTGTTCCAAATCTCCAGCTGTTCCAATCTCCAGGTCCAAATGTTTAG  
 PVKW010035556.1 : GAGATAGCTTAGCAGTTAAAGATGCTTACTTAGGGCTGGAGAGATGCTTAGC---GGTTAAGGTCCTGCGCTGCTAAGCCTAAGAAAGCCGTTCCAAATCTCCAGCAGTTCCAATCTCCAGGTCCCACGTTTAG  
 PVKW010000339.1 : TGAATGCACTTATTTATATAGAATTTTTTGGGCTGGAGAGATGGCTTAGT---GTTTAATTCACCTGCGCTGCTAAGCCTAAGAAATGCTGTTCCAAATCTCCAGCGGTTCCAATCTCCAGGTCCCACGTTTAG  
 PVKW010019089.1 : CTATCACTTGTAGCCTTAAAGTCTTGACTAGGGGCTGGAGAGATGGCTTAGC---AGTTAAACACCTGCTTCTAAGCTAAGAAACCTGTTCCAAATCTCCAGCAGTTTCAATCTCCAGGTCTTACGTTTAG  
 PVKW010000834.1 : GTCTGTGTTTTAAATTTTAAAAAGCATTTTGTGGGCTGGAGATATGGCTTAG---CACTTGCGCTGCTAAGCCTAAGAAAGCTGTTCCAAATCTTAGCAGTTCTAATCTCCAGGTACCACATTTTAG  
 PVKW010039861.1 : TTGTTTGGCCAACTTGTTTAAAGCTGTAATGTGGGCTGGAGAGATGGCTTAGC---GGTTAAGGCGCTGCGCTGCTAAGCCTAAGAAACCTGTTCCAAATCTCCAGCTGTTCCAATCTCCAGGTCCCACGTTTAG  
 PVKW010013087.1 : GTGCTGAAAACCTAATCAAAAGCCTATGATCATGGGCTGGAGAGATGGCTTAG---GGTTAAGGTCCTGCGCTGCTAAGCCTAAGAAACCTGTTCCAAATCTCCAGTGTGTTCCAATCTCCAGGTCCCACGTTTAG  
 PVKW010036625.1 : CTGGGACAAAATACCTTAAAAAAGTTTAGGGCTGGAGAGATGGCTTAGC---GGTTAAGGCGCTGCGCTGCTAAGCCTAAGAAATGCTGTTCCAAATCTCCAGCAGTTCCAATCTCCAGGTCCCACGTTTAG  
 PVKW010050425.1 : GGTGGGACCATGAAGAAAATATCCCTTTTGGGCTGGAGAGATGGCTTAGC---GGTTAAGGCACTGCGCTGCTAAGCCTAAGAAAGCTGTTCCAAATCTCCAGCGGTTCCAATCTCCAGTCCCACATTTAG  
 PVKW010009699.1 : TTTACAGGGAAGATAATTTAAGAAGGCTTGTAAGGCTGGAGAGATGGCTTAGT---GGTTTAGGCACTGCGCTGCTAAGCCTAAGAAATGCAATTCGAAATCT-----CCAGGTCCCACGTTTAG  
 PVKW010011748.1 : CCTGCAGACTTGGATGAGAAATGGGTTACACAGGGCTGGAGAGATGGTTAGT---GGTTAAGGCACTGCGCTGCTAAGCCTAAGCAAGTCATTTCCAATCT-----CCAGGTCCCACGTTTAG  
 PVKW010072702.1 : TATGGATGAGTCTATCTTCGAAAACACACAGTGGGGCTGGAGAGATAGCTTAGT---GGTTAAGGCGCTGCGCTGCTAAGCCTAAGAAACAGAGTTCCAAATCT-----CCAGGTCCCACGTTTAG  
 PVKW010009701.1 : GATGAAGTCGTAGTGTAAAGTGCACCAAGGGGCTGGAGAGATTACTTAGT---GGTTAAGCACTGCGCTGCTAAGCTTAGGAAGCCTGTTCAATTTCT-----CCAGGTCCCACGTTTAG  
 PVKW010010323.1 : GGCAATGAAAATTTAATCAAAACCTGTGGGCTGGGCTGGAGAGATGGCTTAGC---AGCCAAGGAGACCTACCTGCGAAGCCTAAGAAATCCCGCTTTGATTCT-----CCAGGTCCCACATTTTAG  
 PVKW010014843.1 : GAATTAGGTTCTTACATTTAAAAAAGATTGAGCTAGAAAGATGGCTTAGC---GGTTAAGGCGCTGCGCTGCTGCAAGCCTAAGAAACCTGTTCCAAATCT-----CCAGGTCCCACATTTTAG  
 PVKW010062733.1 : TACTTCAAAACATTACATTAAGAGCTCTTCAATGGGCTGGAGAGATGGCTTAGC---AGTTAAGGCACTATCTGCTAAGCCTAAGAAACCCGTTCCAAATCT-----TCAAGTCCCACATTTAG  
 PVKW010058492.1 : AAGCACACAGTATCTTTAAAAATGACAGAGGAGGGCTAGAGAGATGGTTGCTTAGCAGTTAAGGCACTGCGCTGCTAAGCCTAAGAAACCCGTTGGATCT-----CCAGGTCCCACATTTTAG  
 PVKW010012334.1 : AGTCTTCTGAAATAAATTTTAAAAAAACGAAAGGCTGGAGAGATGGCTTAGT---GATTAAGGTCCTGCGCTGCTAAGCCTCAGAACTCCGTTCCAAATCT-----CCAGGTCCCACGTTTAG  
 PVKW010005809.1 : GAGTATTCAAAGTATCAAAAGCAATAGATAGGGCTGGAGAGATGGCTTAGC---TGTTAAGGAGCTGCGCTGCTAAGCCTAATAATGCTGTTCCAAATCT-----CCAGGTCCCACATTTTAG  
 PVKW010021368.1 : TAGGTGAAGCCTTCAACAGCACTACTTATAGAGGGGCTGGAGAGATGGCTTAG---GTTAAGGCGCTGCGCTGCTAAGCCTAAGAAAGCTGTTCCAAATCT-----CTAGGTCCCACGTTTAG  
 PVKW010021276.1 : AGGCATGAGGTGGCTTTATAAAAACACATGGGGGCTGGAGAGATGGCTTAGT---GGTTAAGGCGCTGCGCTGCTAAGCCTAAGAAAGCCGTTCCAAATCT-----CCAAGTCCCACGTTTAG  
 PVKW010091622.1 : AGGCATTTCTGACTTAAAAAAATGCCTTAGCGGGGCTGGAGAGATGGCTTAGC---GGTTAAGGTCCTGCGCTGCTAAGCCTAAGAAAGCCGTTCCAAATCT-----CCAGGTCTCAGGTTTAG

PVKW010050067.1 : CAAGAGGCCTTTCTTAA~~AA~~TTTGGCTGGT~~TCT~~GGGCTGGAGAGATGGCTTAGT~~----~~GGTTAAGGCGCCTGCCTGCT~~AA~~AGCCTGAGAATG~~CC~~GTTTGATTCT~~-----~~CCAGGTTCCGCGTTTAG  
PVKW010045168.1 : GGAATACTAAAA~~TAA~~AGTAAGACAACTACTTGGCTGGAGAGATGGCTTAGT~~----~~GGTTAGCGCGCCTGCCTGCT~~AA~~TCTAAGAATGCTGGTTCTAATCT~~-----~~CCAGGTCCACATTTTAG  
PVKW010003456.1 : ACACAGATTTTTTTGTGCTTAA~~AA~~AGCACTTTGGGTTGGAGAGATGGGCTAGC~~----~~GGTTAAGGTCTCTGCCTAAGAAGCCTAAGAACCTGTTCTCAAATCT~~-----~~CCAGGCGCCCATGTTTAG  
PVKW010003369.1 : CTGTGTAAAA~~AAAA~~AAAAAAGTCTTGGCTGGAGAGATGGCTTAGC~~----~~GGTTAAGGCGCCTGCTCT~~TA~~AGCCTAAGAAGCCTCGTTTCCAATCT~~-----~~CCAGGTCCCATGTTTAT  
PVKW010002278.1 : GCA~~AAAA~~AAAA~~AAAA~~AAAAAATCCTGGGCTGGAGAGATGGTTTAGG~~----~~GGTTAAGGTGCTGCCTGCT~~CA~~AGCCTAAGAAGCCTGGTTCCAATCT~~-----~~CCAGGTCCACATTTTAG  
PVKW010065534.1 : AATAGCCAGCTCAAGTAA~~GA~~ACGGTGAAAGAGGGCTGGAGAGATGGCTTAGT~~----~~GGTTAAGGCACTGCCTGCT~~CA~~AGTCTAAGAAGCGCTCGTTTGATGCT~~-----~~CCAGGTCCACATTTTAG  
PVKW010009466.1 : ACTTGTCACAGGTTTAT~~AA~~AGTGCAACTGCAAGGGCTGCAGAGATGGCTTAGT~~----~~AGTGAAGGCGCCTGCCAGCT~~AA~~AACTAAGA~~-----~~TTCT~~-----~~CCAGGTCCACATTTTAG  
PVKW010005573.1 : AAAA~~AAAA~~AGAGAA~~AAAA~~AGACAGATGAAGGCTACAGAGATGGCTTAGG~~----~~GGTTAAGGTGCCCGCCTGCT~~TA~~AGCCTAAGAATGCCTATTGATTCT~~-----~~CCAGTCCCATGTTTAG  
PVKW010035532.1 : GGATCTTTTGGAA~~TC~~GTAAATTTATATGCCAGGGCTGGAGAGATAGCTTAGT~~----~~GGTTAAGGCGCCTGCCTGCT~~TA~~AGCCTAAGAACACCATTTGCTATTCT~~-----~~CCAGGTCCATGTTTAG  
PVKW010018070.1 : GAGATCACTAGGCTGACTCA~~AA~~AGTTACCATAGGGCTGGAGAGCTAGCTTAGT~~----~~GGTTAAGGTCTATTGCCTGTGAGCCTAAGSACCATGTTCTACTCT~~-----~~CCAGGTCCCATGTAAG  
PVKW010017522.1 : GCAGACTCTCTTAGCAACTAG~~AA~~AGCCATTTGAGGGCTGAAGAGATGGCTTATCT~~----~~GGTTAAGGCGCTTGCCCTGTGAAGCCTAAGSACTATGTTTGACTCT~~-----~~ACAGGTCCACACAAG  
PVKW010065010.1 : CCCCC~~AAAA~~AAAGAGCCTCAAGGAGAGATGGGCTGGAGAGATGGCTTCTG~~----~~GGTTAAGGCACTGCCTGCT~~TA~~AGCCTAAGAAGCTCGTTCCATCT~~-----~~CCAGGTCCCATGTTTAG  
PVKW010014205.1 : ATAGTTCAGTAAGCCTCTTTAA~~AA~~ATGAATAA~~AA~~AGGAGAGAGAGGCGTAGG~~----~~AGTTAAGGCGCCTGCCTGCT~~TA~~AGCCTAAGAATGCTGTTCTGATTCT~~-----~~CGTGTGGATTCTCCAGGTCCACATTTAG
