# Supplementary material for: Analysis of SINE Families B2, Dip, and Ves with Special Reference to Polyadenylation Signals and Transcription Terminators
Source: MDPI journal article supplement (doi:10.3390/ijms22189897), 2021-09-13
Supplement: s1 [file s1]

**Table S3.** Random B2a copies in genomes of 11 to 15 mouse strains

| #  | Chromosome: position      | Number of strains | Tail with a terminator        | Terminator | A-rich tail length, nt |
|----|---------------------------|-------------------|-------------------------------|------------|------------------------|
| 1  | chr11:51715360-51715550   | 13                | TCTTTAAAAAAAAA                | TCTTT      | 10                     |
| 2  | chr13:43664040-43664235   | 12                | TCTTTAAAAAAAAAAAAAAAAA        | TCTTT      | 17                     |
| 3  | chr13:66942593-66942777   | 13                | TTAAAAAA                      | TT         | 6                      |
| 4  | chr14:30578497-30578683   | 13                | TTTAAAAAAAAA                  | TTT        | 9                      |
| 5  | chr14:30578497-30578683   | 13                | TCTTAAAAA                     | TCTT       | 5                      |
| 6  | chr14:30578497-30578683   | 11                | TCTTAAAAAAAAAAAAAAAAA         | TCTT       | 20                     |
| 7  | chr18:10297708-10297895   | 15                | TCTTAAAAAAAAA                 | TCTT       | 11                     |
| 8  | chr19:47606649-47606832   | 13                | TTAAAAAAAAACAAA               | TT         | 13                     |
| 9  | chr14:24531504-24531696   | 13                | TCTTAAAAAAAAAGAAAAAAAAAGAAAAA | TCTT       | 26                     |
| 10 | chr14:27207291-27207481   | 13                | TCTTTAAAAAAAAAAAAAAAAA        | TCTTT      | 15                     |
| 11 | chr14:30062273-30062465   | 13                | TCTTTAAAAAAAAAAAAAAAAA        | TCTTT      | 14                     |
| 12 | chr14:30578497-30578683   | 13                | TTTAAAAAAAAACAAA              | TTT        | 13                     |
| 13 | chr14:31490385-31490575   | 13                | TCTTTAAAAAAAAAAAAAAAAA        | TCTTT      | 19                     |
| 14 | chr14:35691462-35691647   | 11                | TCTTAAAAAAA                   | TCTT       | 8                      |
| 15 | chr2:18412592-18412770    | 13                | TCTTTAA                       | TCTTT      | 2                      |
| 16 | chr2:29597710-29597901    | 13                | TCTTTAAAAAAAAA                | TCTTT      | 10                     |
| 17 | chr3:64173540-64173724    | 15                | TCTTTAAAAAAAAA                | TCTTT      | 9                      |
| 18 | chr5:24397428-24397619    | 11                | TCTTTAAAAAAAAAAAAAAAAA        | TCTTT      | 15                     |
| 19 | chr9:22407820-22408014    | 11                | TCTTAAAAAAAAATTGAAAAAAAAA     | TCTT       | 21                     |
| 20 | chr9:32195046-32195237    | 13                | TCTTAAAAAAAAAAAAA             | TCTT       | 12                     |
| 21 | chr9:44053720-44053926    | 15                | TCTTAAAAAAAAAAAAAAAAA         | TCTT       | 15                     |
| 22 | chrY:90759898-90760086    | 14                | TCTTTAAAAAAAAAAAA             | TCTTT      | 11                     |
| 23 | chr10:4351213-4351404     | 12                | TCTTTAAAAAAAAAAAAAAAAA        | TCTTT      | 18                     |
| 24 | chr10:95535916-95536111   | 15                | TCTTTAAAAAAAAAAAAAAAAA        | TCTTT      | 14                     |
| 25 | chr11:23823909-23824100   | 12                | TCTTTAAAAAAAAAAAAAAAAAAAAA    | TCTTT      | 23                     |
| 26 | chr12:94096263-94096454   | 11                | TCTTAAAAAAAAAAAAA             | TCTT       | 15                     |
| 27 | chr13:18527215-18527405   | 12                | TAAAAAAAAA                    | T          | 9                      |
| 28 | chr17:88152809-88152999   | 14                | TCTTAAAAAAAAAAAAA             | TCTT       | 13                     |
| 29 | chr11:107232676-107232866 | 15                | TCTTTAAACAAACAAACAAACAAACAAA  | TCTTT      | 27                     |
| 30 | chr3:88683096-88683288    | 15                | TCTTTAAAAAAAAAAAAA            | TCTTT      | 12                     |
| 31 | chr6:91874847-91875036    | 13                | TCTTTAAAAAAAAAAAAA            | TCTTT      | 12                     |
| 32 | chr13:23540051-23540241   | 15                | TCTTTAAAAAAAAAAAAA            | TCTTT      | 13                     |

|    |                           |    |                                                         |        |    |
|----|---------------------------|----|---------------------------------------------------------|--------|----|
| 33 | chr17:26675628-26675819   | 15 | TCTTAAAAAAAAAAAA                                        | TCTT   | 10 |
| 34 | chr17:29113145-29113334   | 15 | TCTTAAAAAAAAAAAA                                        | TCTT   | 8  |
| 35 | chr18:10574475-10574666   | 15 | TCTTTAAAAAAAAAAAAA                                      | TCITT  | 13 |
| 36 | chr9:119310815-119311007  | 14 | TCTTTAAAAAAAAAAAAA                                      | TCITT  | 14 |
| 37 | chr12:13001564-13001755   | 13 | TCTTTAAAAAAAAAAAAA                                      | TCITT  | 14 |
| 38 | chr14:31554676-31554883   | 15 | TCTTTAATAAATAAATAAATAAATAAATAAAT                        | TCITT  | 27 |
| 39 | chr18:34355901-34356093   | 13 | TCTTTAAAAAAAAAAAAA                                      | TCITT  | 14 |
| 40 | chr1:106181690-106181880  | 13 | TCTTTTAAAAAAAAAAAA                                      | TCITTT | 12 |
| 41 | chr14:21643225-21643417   | 12 | TCTTTAAAAAAAAAAAAAAAAAAAAAAAAAAAAA                      | TCITT  | 31 |
| 42 | chr6:51074276-51074464    | 13 | TCTTTAAAAAAAAAAAAA                                      | TCITT  | 14 |
| 43 | chr11:97846758-97846939   | 14 | TCTTTAAAAAAA                                            | TCITT  | 7  |
| 44 | chr8:22609531-22609714    | 15 | TCTTTAAAAAAA                                            | TCITT  | 9  |
| 45 | chr8:114337906-114338100  | 13 | TCTTAAAAAAAAAAAAA                                       | TCTT   | 14 |
| 46 | chrX:140970475-140970666  | 13 | TCTTTAAAAAAAAAAAAA                                      | TCITT  | 13 |
| 47 | chr14:45544697-45544887   | 15 | TCTTAAAAAAAAAAAAA                                       | TCTT   | 13 |
| 48 | chr15:77411890-77412081   | 13 | TCTTTAAAAAAAAAAAAA                                      | TCITT  | 13 |
| 49 | chr6:113350910-113351100  | 15 | TCTTAAAAAAA                                             | TCTT   | 9  |
| 50 | chr11:107301265-107301438 | 12 | TAAAAAAAAAAAAA                                          | T      | 13 |
| 51 | chr1:131913063-131913254  | 15 | TCTTAAAAAAA                                             | TCTT   | 9  |
| 52 | chr3:83998650-83998840    | 13 | TCTTAAAAAAAAAAGAA                                       | TCTT   | 14 |
| 53 | chr6:117878239-117878427  | 12 | TCTTTAAAAAAA                                            | TCITT  | 7  |
| 54 | chrX:95069064-95069254    | 15 | TCTTTAAAAAAAAAAAAA                                      | TCITT  | 12 |
| 55 | chrX:155253601-155253780  | 15 | TCTTTAATTTATTTAAAAATAAATAAATAAATAA                      | TCITT  | 30 |
| 56 | chr10:67162435-67162625   | 13 | TCTTTAAAAAAAAAAAAA                                      | TCITT  | 13 |
| 57 | chr11:106126950-106127141 | 13 | TCTTTAAAAAAAAAAGAAAGAAAAGAAAAGCTA<br>TTAAAAAAAAAAAAAAAA | TCITT  | 47 |
| 58 | chr11:107289242-107289437 | 11 | TCTTTAAAAAAAAAAAAA                                      | TCITT  | 14 |
| 59 | chr12:31096211-31096402   | 12 | TCTTTAAAAAAAAAAAAA                                      | TCITT  | 16 |
| 60 | chr14:34331392-34331581   | 15 | TCTAAAAAATAAAAAAATAAAAAA                                | TCT    | 24 |
| 61 | chr17:26109816-26110008   | 15 | TCTTTAAAAAAAAAAAAA                                      | TCTT   | 17 |
| 62 | chr3:20009951-20010141    | 13 | TCTTTAAAAAAAAAAAAAAAAAAAAAAAAAAAAA                      | TCITT  | 30 |
| 63 | chr4:36958065-36958254    | 15 | TCTTTAAAAAAGAAAAAGAAAT                                  | TCITT  | 18 |
| 64 | chr6:49447538-49447725    | 15 | TCTTTAAAAAAAAAACAAAAA                                   | TCITT  | 18 |
| 65 | chr11:20091033-20091222   | 15 | TAAAAATTAAAAAAAAAAAAAGAAAAA                             | T      | 27 |
| 66 | chr11:107330097-107330289 | 15 | TTTAAAAAAAAAGAAA                                        | TTT    | 14 |
| 67 | chr3:79625435-79625623    | 14 | TCTTTAAAAAAAAAAAAA                                      | TCITT  | 12 |
| 68 | chr7:126743892-126744082  | 15 | TCTTAAAAAAAAAAAA                                        | TCTT   | 11 |

|    |                                             |    |                        |           |                    |
|----|---------------------------------------------|----|------------------------|-----------|--------------------|
| 69 | chr8:85706724-85706912                      | 15 | TTTAAAAAAAAA           | TTT       | 10                 |
| 70 | chr15:77843869-77844059                     | 13 | TCTTAAAAAAAAAAAAA      | TCITT     | 18                 |
| 71 | chr18:46928983-46929173                     | 12 | TCTTAAAAAACAAAAA       | TCITT     | 24                 |
| 72 | chr11:107380577-107380769                   | 13 | TTAAAAAAAA             | TT        | 9                  |
| 73 | chr2:130916236-130916423                    | 15 | TCTTAAAAAAAAA          | TCITT     | 11                 |
| 74 | chr2:127151968-127152159                    | 11 | TCTTAAAAAAAAA          | TCTT      | 13                 |
| 75 | chr3:20523309-20523501                      | 12 | TCTTAAAAAAGAAAA        | TCITT     | 16                 |
| 76 | chr3:51535076-51535265                      | 13 | TCTTAAAAAAAAA          | TCITT     | 12                 |
| 77 | chr4:104474978-104475165                    | 15 | TCTTAAAAA              | TCITT     | 7                  |
| 78 | chr5:87028163-87028353                      | 13 | TCTTAAAAAAAAAAAAA      | TCTT      | 16                 |
| 79 | chr6:82636622-82636814                      | 12 | TCTTAAAAAAAAA          | TCTT      | 13                 |
| 80 | chr9:48462214-48462400                      | 14 | TTTAAAAAATAA           | TTT       | 12                 |
| 81 | chr1:191553289-191553474                    | 12 | TTTAAAAAAAAAAAA        | TTT       | 13                 |
| 82 | chr2:174321465-174321652                    | 13 | TCTTAAAAAAAAAAAAA      | TCITT     | 14                 |
| 83 | chr9:14399569-14399757                      | 12 | TCTTTTAAAAAAGAAAA      | TCITTT    | 16                 |
| 84 | chr1:12272434-12272614                      | 13 | TCTTTTAAAAA            | TCITTT    | 7                  |
| 85 | chr2:60163028-60163218                      | 14 | TCTTAAAAAAGAAA         | TCTT      | 15                 |
| 86 | chrX:48507467-48507658 <a href="#">Mm1t</a> | 12 | TCTTAAAAAATAAAAAATAAAA | TCITT     | 23                 |
| 87 | chr1:132242147-132242338                    | 15 | TCTTAAAAA              | TCITT     | 8                  |
| 88 | chr16:17919203-17919386                     | 15 | TCTTTTTAAAAA           | TCITTTTT  | 7                  |
| 89 | chr3:95795999-95796191                      | 14 | TTAAAAAATAAA           | TT        | 15                 |
| 90 | chr13:18542264-18542450                     | 12 | TTAAAAAAGAA            | TT        | 12                 |
| 91 | chr13:17991337-17991525                     | 15 | TCTTTTTTAAAGAAAAA      | TCITTTTTT | 10                 |
| 92 | chr1:136358246-136358434                    | 15 | TCTTAAAAA              | TCITT     | 9                  |
| 93 | chr8:70620149-70620336                      | 14 | TCTTAAAAAAGA           | TCTT      | 10                 |
| 94 | chr11:107306791-107306979                   | 13 | TTTAAAAAAGAAA          | TTT       | 16                 |
| 95 | chr4:152319403-152319590                    | 15 | TTAAAAAAGAAA           | TT        | 13                 |
| 96 | chr10:77005875-77006061                     | 15 | TCTTAAAAA              | TCITT     | 9                  |
|    |                                             |    |                        |           | Mean length = 15,0 |

### Terminator statistics

| Sequences              | Number | Fraction |
|------------------------|--------|----------|
| TC(T) <sub>&gt;3</sub> | 5      | 5.2%     |
| TCITT                  | 50     | 52.0%    |
| TCTT                   | 24     | 25.0%    |
| Others                 | 17     | 17.7%    |
