# Supplementary material for: Analysis of SINE Families B2, Dip, and Ves with Special Reference to Polyadenylation Signals and Transcription Terminators
Source: MDPI journal article supplement (doi:10.3390/ijms22189897), 2021-09-13
Supplement: s1 [file s1]

[illegible]

NW005871311.1\_1 : GAATTTGTAGTTTCAAAAATGAAATGCGCCCTGACCGGTTGGCTCAGTGGAT--AGAGCCTCGGCCCTGCAGACTCAAGGGTCCCAAGGTTCCA-TTCCGGTC-AAGGGCATCTG-CCTTGGCT  
NW005871051.1\_2 : AGTGGTATTACATGTGCAGAAGGATAGCCCTAACTGGTTTGGCTCAGCAGAT--AGAGCTTCGGACTGAGGACTGAAGGGTCCCAAGGTTTGA-TTCTGGTC-AAGGGCATCTA-CCTTGGTT  
NW005871155.1\_2 : TTGTGACCCAACCATAAAATTATTTTCCCTGGCGGTTTGGCTCAGTAGAT--GGAGTCTCGGCCCTGTGGACTGAAAGGTCCCAAGGTTTGA-TTCAGGCC-AAGGGCATCTA-CCTTGGTT  
NW005872153.1\_3 : TTTTGTGAGATTAAAAAGGTCAATACACTGACCGGTTTGGCTCAGTGGAT--AGAGCGTTGGCTGCGGACTCAAGGGTCCCGGGTTTGA-TTCCGGTC-AAGGGCATCTA-CCTTGGTT  
NW005871148.1\_4 : TATGATTCTGCCTTAAAAAGGAATGAAGCCAAACCGGTTTGGCTCAGTGGAT--AGAGCCTCAGCTTACGGACTGAAAGGTCCCA-GTTTGA-TTCCGGTC-AAGGGCATCTA-CCTTGGTT  
NW005871082.1\_2 : ATTGACTCCATAAAAGTACCCATTTGGCGCCCTGACTGGTTTGGCTCAGTGGATA-AGATTCATCGGCCTGTGGACTGAAAGGTCCCAAGGTTTAT-TTCTGGTC-AAGGGCATCTA-CCTTGGTT  
NW005871337.1\_1 : ATCAAGCCATTAAAAAGACATGGATAGCTCTAACCGGTTTGGCTCAGTGGAT--AGAGCATCAGCCTGTGGACTGGGGTCCCAAGGTTTGA-TTCTGGTC-AAGGGCATCTA-CCTTGGTT  
NW005871065.1\_1 : AAAAAGAACATTAAAAAGGACGCTTTTCCGAACCGGTTTGGCTCAGTGGAT--GAGCGCTTGGCTGCGGACTGAGGGTCCCAAGGTTTGA-TTCCGGTC-AAGGGCATCTG-CCTTGGTT  
NW005871165.1\_3 : TATAAGAACTAATCAAGAGCTGAGCCAGGCCGAACCGGTTTGGCTCAGTGGAT--AGAGCCTCGGCCCTGAGGACTGAAGGGTCCCAAGG-----TTCCGGTC-AAGGGCATCTA-CCTTGGTT  
NW005871073.1\_3 : ATTGCATTCACTAAAAAGCAGAGCATGCCCTAGCTGGTTTGGCTCAGTGGAT--AGAGCGTTTGTCTCTGCAGACTGAAGGGTCCCAAGTTTAA-TTCTAGTC-AAGGACACATG-CTCGGGTT  
NW005871563.1\_1 : CAACATTAGTGTCTGGATTAAACCGTGTCCCTAGCCGGTTTGGCTTAGTGGAC--AGAGCCTTGGTTAGCAGACTGAAGGGTCCCGGGTTTAA-TTCTGGTC-AAGGGCACATG-CCCAGGTT  
NW005871431.1\_9 : TTTTCATGATACAAAAGATGCCGCTGGAGCCCTGGCAGGTTTGGCTCAGTGGAT--AGTGCATCGACCTGTGGACTGAGGGTCCCAAGGTTTGA-TTCCGGTC-AAGGTTATCTA-CCTTGGCT  
NW005871069.1\_9 : ATAGGCCCTACCTCAAAAACCAGAAAAGCCCTGATCGGTTTGGCTCATTTGGAT--AGAGCCTCGGCCCTGGGGACTGAAGGTTCCCGGGTTTGA-TTCTGGTC-AAGGTCATCTGA-CCTTGGTT  
NW005871112.1\_3 : ATTTCTCTTGTCTAAATATGCTGAGTAGCTCTTACCGGTTTGGCTCAGTGGAT--AGAGCATCGGCCTGCGGACTGAAGGATCCCGGGTTTGA-TTCTGGTC-AAGGGCATCTA-CCTTGGTT  
NW005871096.1\_5 : AAATTTCCAACAAAATGTGTATGTATAGCCCTGACTGGTTT-GCTCATATGGAT--AGAGCATCGGCCCTG-GGACTGAAGGGTCCCGGGTTTGA-TTCTAGTC-AAGGGCATCTA-CCTTGGTT  
NW005871270.1\_3 : AAGTGGGAATAAAAAAGGAAGATGGGCCCTGACTGGTTTGGCTCAGTGGAT--AGAGCCTCGGCCCTGCAGACTCAAGGGTCCCAAGTTTGA-TTCTGGTC-AAGGGCATCTA-CCTTGGTT  
NW005871767.1\_1 : AATGCTTTATAAAATCAACTGGTATATAGCCCTAACCGGTTTGGCTCAGTGGAT--AGAGCATCGGCCCTGCGGACTCAAGGGTCCCAAGGTTTGA-TTCTGGTC-AAGGGCATATA-CCTTGGTT  
NW005871176.1\_3 : GTAAATACGTTTAAATACCGTAAGGCAGCCAAAACCGGTTTGGCTCAGTGGCT--AGAGCCTCGGCCCTGCGGACTGAAAGGTCCCAAGGTTTGA-TTCCGGTC-AAGGGCATCTA-CCTTGGTT  
NW005871060.1\_1 : CAGTGTATTGTTTAAAAAGTACTACCAACCCCTAACCACTTTTGGCTCAGTGGAT--AGAGCATTGGCCTGTGGACTGAAGGGTCCCGGATTCAA-TTCTGGTC-AAGGTTATCTG-CCTTGGAT  
NW005871091.1\_4 : CTGACTTTAAATAGGGAGGTTAGCCCACTGGCTGGTTTACTCAGTGGAT--AGAGCATCAGCCTGTGGACCAAGGGGACCTCTTCTGA-TTCTGGTC-AAGGGCACATG-CCCAGGTT  
NW005871534.1\_3 : ACCTTTTATTTTAAACCTTAAGGTCTAGCCCTGGCTGGTTTACTCAGTGGAT--AGAGCATTGGCCTGTGGG-AAAAGGGTCCCAAGGTTCAA-TTCTAGTC-AAGGGCACATG-CCTGGGTT  
NW005871346.1\_5 : CTTTTCAACATTCAAGATACAAATCTTCCCTAGCTGGTTTGGTTCTGTGGAT--ACAGCAGTGGCCTGTCAACTGAAAGGTCCCTGGTTCCG-TTCTGGTC-AAGGGCACATG-CCCAGGAT  
NW005871075.1\_2 : CATTTGTTCATTCAAGAAATATTCTTCCGCTAGTGGTTTGGCTCAGTGGAC--AGAGCCTTGGCCTGTGGACTGAAGGGTCCCGGGTTTGA-TTCCGGTC-AAGGGCACATG-TCCAGGTT  
NW005871048.1\_1 : TCAGGATAGATTAAAAATCTACCTTTTCTCTAGTTGGTTTGGCTCAGTGGAT--AGAGTCTCGGCCCTGTGGACTGAAGGGTCCCAAGGTTTGA-TTCCGGTC-AAGGTTACATG-CCCGGGTT  
NW005871088.1\_8 : CCTTACCTGAAAAAAAATAATTTTCCAGCCTAGGTTGGTTTGGCTCTGTGGAT--AGAGCATTCAGCTGTGGACTGAAGGGTCCCAAGTTTGA-TTCCAGCC-AAGGGCACATG-CCCGGGTT  
NW005871126.1\_9 : TATTCACATGAAAAAGTAAGATTAGACAGCCCTAGATGGTTTGGCTCGTGGAT--AGAGCATTCGCCCTGTGAATGAAGGGTCCCGGGTTTAA-TTCTGGTC-AAGGGCACATG-CCCGGGTT  
NW005871419.1\_8 : CAATGCCAGAAATAAAGCAATAGAGCCCTAGCTGGTTTGGCTCAGTGGAT--AGAGCCTCAACCTACGGACTGAAGGGTCCCTGGGTTTGA-TTCCAGTC-AAGGGCACATG-GTTGGGTT  
NW005871067.1\_7 : CATTTTCTTTATTTGATAAACATATTTGCCCTAGCTGATTTGGCTCAGTGGCT--ACGGCATCAGCCTGTGGACTGAAGGGTCCCTGGGTTTGA-TTCTGGTC-AAGGGCACATG-CCCAGGTT  
NW005871349.1\_1 : AATTATTTCTTATTAATATGTGTAATTTTCTTACCGGTTTGGCTCAGTGGAT--AGAGCATTCGCCCTGTGGACTGAAGGGTCCCGGGTTTGA-ATCTGGTC-AAGGGCACATG-CCCAGGTT  
NW005871109.1\_5 : TGGCTCACGAGCAGCAGTTTGGCGACCACTGCAGCTGGTTTGGCTCAGTAGAT--AGAGCCTTGGCCTGTGGACTGAAGGGTCCCAAGTTCGA-TTCTGGTC-AAGGGCACATG-CCTGGGTT  
NW005874004.1\_1 : TAATTATACTTAAAAACAAGTGACAGTCCCTGGCTGGTTAGACTCAGTGGCT--AATGCATCGGCCTGCGGACTGAGGGTCCCGGGTTTGA-TTCCGGTT-AAGGATAGAGG-CCCAGGTT  
NW005871206.1\_6 : GAATAATGTTTAAAAATGCGTAACAGGCGCCCTAGCCAGCTTGGCTCAGTGGAT--AAAGCCTCAGCCTGCGGACTGAAGGGTCCCAAGGTTCAA-TTCTGGCT-AAGGGCACATG-CCTGGGTT  
NW005871123.1\_4 : ATGAAGTCTTTAAGAACAGGATTGCTTCTAGTTGGTTTGGCTCAGTGGCT--AGAGCCTCAGCCTGAGGACTGAAGGATCCATAGGTTCAA-TTCTGGTC-AAGGACACTTG-CCTGGGTT  
NW005871055.1\_6 : ACAGTGATTTTAAACACAGCTGCGTGGCTAGCTCTTTTGGCTCAGTAGAT--AGAGCATCAGCCTGAAGACTGAAGTTTCCCAAGGTTCAA-TTCCAGCC-AAGGGCACATG-CCAGGTT  
NW005871068.1\_9 : GGAACAGGTAATAAAGAAATACACTAGGCCCTAGCTGGTTTGGCTCAGTGGAT--TGAGCATTCGCCCTGCAGACTGAAGGGTCCCAAGGTTTGA-TTCCGGTT-CAGGGCATCTA-CCTGGGTT  
NW005871516.1\_4 : TGGTGTCTTTATAAAAGGGGACATTTGGCCCTAGCTCATTTGGCTCAATGGAT--AGAGCATCGGCCCTGCGGACTGAAGGGTCCCGGGTTTGA-TTCCAGTC-AAGGGCACATG-CCCAGGTT  
NW005871085.1\_3 : TAGGTGCAGATAAAAAAGCAGCTTTAGCCCTAGCTGGTTTGGCTCAGCGGAT--AGAGCATCAGCCTGCGGACTGAAGGGTCCCAAGGTTTGA-TAACGGTC-AAGGGCACATG-CCTGGGTT  
NW005871063.1\_5 : TGAAGATTAAAAAACAGTGGTACATGCCCTGACTGGTTTGGCTCAATGGAT--AGAGCCTCAGCCTGCGGACTGAAGGGTCTCTGGGTTTGA-TTCCGGTA-AAGGGCACATG-CCCGGGTT  
NW005871093.1\_5 : ATGAGCAAAAATAAAAAAGTAGCAGGTAAAGCCCTAGCGGTTTGGCTTAGTGGAT--AGAGCCTTGACCTTCAGACTGAAAGGTCCCGGGTTTAA-TTCTGGTC-AAGGGCACATG-CCCGGGTT  
NW005881170.1\_2 : GCTAAGGGATTAAAGCAACATTAATTAGCCCTAGCTGGCTTGGTTTGGTGGAT--AAAGCCTCGGCCCTGCGGACTGAAGAGTCCCTGGGTTTGA-TTCCAGTC-AAAGGCACATG-CCCAGGTT  
NW005871097.1\_6 : TTTACAAGAAAAAAAAGTTGCTCAGGCCCTAGCTGGTTTGGCTCAGTGGAC--AGAGCATCGGCCCTGTGGACTGAAAGGTCTCTGGGTTTAA-TTCCAGTC-AAGGGCACATG-CCCGGGTT  
NW005871464.1\_5 : CTGGACAAGTGGTTGTAGCTTTTGCAGAAGTGAATCCAAATGGCTCAGTGGAT--AGAGCATTCAGCCTGTCACTGAAGGGTCCCTGGTTTGA-TTCTGGTC-AAGGGCACATG-CCTGGGTT  
NW005871049.1\_2 : ATAAATTTAATTTTAAAAAATGGTAAAGCTCTCGCTGGTTTGGCTCAGTGGCT--AGAGCACT-GCCTGCAGACTGAAGGGTCCCTGGGTTTGA-CTCTGGTC-AAAGGCACATG-CCTGAGTT  
NW005871111.1\_3 : GAAACTGAGAATCAAACTGATTAATAGCCCTAGCTGGTTTGGCTCAGTGGAT--AGAGCCTTGGCCTTCGGACTGAAGGTTCCCAAGGTTTGA-TTCCGGTC-AAGGGCATATG-CCTGGGTT  
NW005871143.1\_1 : CAAATACAGTGTTATTTAAAAAGTACCGCCCTGGCAGGAATGGTCTCAGTGGCT--AGAGCATCGGCCCTGAGACTGAAGAGTCCCTGAGTTTGA-TTCCGGTC-AAGGGCACATG-CCTGGGTT  
NW005872372.1\_5 : ACCTAAGTTAAACAACATTTACAGTAGCGCCCTGCGCTGGTTTGGCTCAGTGGCT--AGAGCCTCGGCCCTGTGGACTGAAGGGTCCCTAGGTTTGA-TTCCAGTC-AAGGACACAGC-CCCGGGTT  
NW005871909.1\_5 : TGCAGAATTCACATTAAACAGCATCATGCCCTAGCCGGTTTGGCTCAGTGGAT--AGAGCCTCAGCCTGC-GACTGAAGGGTCCCAAGGTTTGA-TTCTGGTC-AAGGGCACATG-CCCAGGTT  
NW005875787.1\_1 : GGCACACGATTTAAAAATAAAACACTGCGCCCGGCTGGTTTGGCTGTGTGGAT--AGAGTCTCAGCCTGCGGACTGAAGGGTCCCGGATTTTGA-TTCTGGTC-AAGGGCACATA-CCTGGGTT  
NW005872538.1\_1 : TTTTTTTAAAAAAAACAGGCTACATGCCCTGGCGGTTTGGCTCAGTGGAT--AGAGCATCAGCCTGTGGACCAAGGGTCCCAAGGTTTGA-TTCTGGTC-AAGGGCACATG-CCTGGATT  
NW005876019.1\_8 : ATGTTATTGAAGAGACACAAAAAAGGCCCTAGCCATTTGGCTCAGTGGCT--AGAGCATTCAGCTGCACTGAAGGAGGGCTTGAGTCTGA-TTCTGGTC-AAGGGCACATG-CCTGGGTT  
NW005871054.1\_8 : CTTTTTGCATTTAAAAATATGCAATTAGCCCTAGCTGGTTTGGCTCAGTGGAGA-AGAGCCTTGGCCTGCGGACTGAAAGGTCCCTGGGTTTGA-TTCTGGTC-AAGGGCACATA-CCCGGGTT  
NW005871074.1\_1 : ATCTGTATGGATAAGAAATTGAGATAGTCCCTAGCTGGTTTGGCTCAGTGGAT--AAAGCATCAGCCTGAGGACTGAAGGGTCCCTGGGTTTGA-TTCTGGTC-AAGGGCACA-----  
NW005871068.1\_3 : CTAGTGAATAAGATATTGTAGTCCAGCCCTAGCTGGTTTGGCTCAGTGGAT--AGAGCATTAGCCTATGGACCAAGGGTCCCA-----GTC-AAGGTTACCTG-CCTGGGTT  
NW005871151.1\_6 : ACTGTACCCCTTAATGTGGTTAAGTACCCCTAACTGGTTTGGCTCAGTGGAT--AGAACTTCGGTTCTGGACTGAAGGTCCCAAGTTTGA-TTCCGGTC-AAGGAAACATG-CCTGGGTT  
NW005872725.1\_2 : AGAGTGTGCCTTCAAGAGACTTTATCTGCCCTAGCTGGCTTGGCTCAGTGGAT--AGAGCATCAGCCTGCGGACTCAAGGGTCCCAAGGTTTGA-TTCTAGCT-AAGGGCACATG-CCTGGGTT  
NW005871311.1\_1 : TACAAAGGAATATCAAGAAATATCTTCAGCTCTAGCTGGTTTGGCTCAGTGGATAGAGAGCATCAGCCTGCAGACTGAAGGGTCCCTGGGTTTGA-TTCTAGTC-AAGGGCACATG-CCCAGATT  
NW005871048.1\_6 : AGTTATAATGTAGAAATGTCTCCAGTGGCCCTAGCTGGTTTGGCTCATTTGGAT--AGAGCCTCGGCCCTG-----GGTTTGA-TTCCGGTC-AAGGGCATCTA-CCTTGGTT

NW005871163.1 1 : TTTCTGTTTAAAGAAAATATGATTCAGCCCCGAAGTCTGTGGCTCAGTGGT---AAGCACACACCACCACTAAGAGTTCACCACTTCGA-TTTCAGT-CAGACTACATG-CCAGGGTT  
NW005871179.1 3 : --GCTATAAATGGCTACCACTGCTCTGTCTTGGTTAAAAACCTCCAAGAAAT--AGAGCAATGGCCTATGGACTGAAGGGCCTGGGTTTCA-TTCCAGTC-ACAAG-----CTGGGTT  
NW005871172.1 1 : TCTGCACAGCAAAAGAAACCATCAACAGCCCTGGCTGGTCTTGTCTGCTGGT---AGAGCAATGGCCTGGACATAGGATCTGGGTTTCGAT-TTCCGGTC-----CTGGGTT  
NW005871095.1 2 : TCCTCTTTTAAAAATATTTTATTTTTGCCCTGGCTGGTGTGTGCTCAGTAGTT--AGAG--CTAGCCCTACAGGGAAGGGTCATGGGTTCAATTCTGGTA-AAGGACACCTG-CCTGACTT  
NW005871196.1 3 : CAAAGTACTGATTTAAAAAGGCAACCAGCACTGGCCAGTGTAGCTCAGTAGTC--AGAATCTTAGCCAC--ACCAAAGGGTTGAGGGTTTATTCACAGTC-AAGGGCACTTA-GCTGGGTT  
NW005871133.1 1 : GGGCCTCTAGTTTAAAAATAATCCAAGCTCTGGTCACTGTGGCTAAGTGGT---AAGCATCAGCCACGCAGTGAAGGGTCTCCAGTTTATTCCTGGTC-AAGGGCATCTA-CCTGGGTT

|                 |   | *  | 140    | *  | 160     | *    | 180                         | *    | 200  | *              | 220  | *                   | 240  |                     |
|-----------------|---|----|--------|----|---------|------|-----------------------------|------|------|----------------|------|---------------------|------|---------------------|
| Ves_a           | : | GC | GGGCAC | AT | CCCCAGT | ---- | AGGGGGTGTGCAGGAGGCAGCTGATC  | GATG | ---- | TTTCTCTCTCATG  | ---- | ATGTTTCTAACTCTCTATC | ---- | CCTCTCCCTTCCCTCTCT  |
| NW005871638.1 2 | : | GC | GGGCAC | AT | CCCCAGT | ---- | GGGGGGTGTGCAGGAGGCAGCTGATC  | GATG | ---- | TTTCTCTCTCATG  | ---- | ATGTTTCTAACTCTCTATC | ---- | CCTCTCCCTTCCCTCTCT  |
| NW005871332.1 6 | : | GC | GGGCAC | AT | CCCCAGT | ---- | AGGGGGTGTGCAGGAGGCAGCTGATC  | GATG | ---- | TTTCTCTCTCATG  | ---- | ATGTTTCTAACTCTCTATC | ---- | CCTCTCCCTTCCCTCTCT  |
| NW005871213.1 2 | : | GC | GGGCAC | AA | CCCCAGT | ---- | GGGACGTGTGCAGGAGGCAGCTGGTC  | GATG | ---- | TTTCTCTCTCATG  | ---- | ATGTTTCTAACTCTCTATC | ---- | TCTCTCCCTTCCCTCTCT  |
| NW005871780.1 1 | : | GC | GGGCAC | AT | CCCCAGT | ---- | AAGGAGTGTGCAGGAGGCAGCTGATT  | GATG | ---- | TTTCTCTCTCATG  | ---- | ATGTTTCTAACTCTCTATC | ---- | CCTCTCCCTTCCCTCTCT  |
| NW005871324.1 2 | : | GT | GGGCAC | AT | CCCCAGT | ---- | AGGAGTGTGCAGGAGGCAGCTGATC   | GATG | ---- | TTTCTCTCTCATG  | ---- | ATGTTTCTAACTCTCTATC | ---- | CCTCTCCCTTCCCTCTCT  |
| NW005871062.1 1 | : | GC | GGGCAC | AT | CCCCAGT | ---- | GGGGGGTGTGCAGGAGGCAGCTGATC  | GATG | ---- | TTTCTCTCTCATG  | ---- | ATGTTTCTAACTCTCTATC | ---- | CCTCTCCCTTCCCTCTCT  |
| NW005871108.1 5 | : | GC | GGGCAC | AT | CCCCAGT | ---- | GGGAGTGTGCAGGAGGCAGCTGATC   | GGTG | ---- | TTTCTCTCTCATG  | ---- | ATGTTTCTAACTCTCTATC | ---- | CCTCTCCCTTCCCTCTCT  |
| NW005871153.1 9 | : | AC | GGGCAC | AT | CCCCAGG | ---- | AGGGGGTGTGCAGGAGGCAGCTGATT  | GATG | ---- | TTTCTCTCTCATG  | ---- | ATGTTTCTAACTCTCTATC | ---- | CCTCTCCCTTCCCTCTCT  |
| NW005871076.1 7 | : | GC | GGGCAC | AT | CCCCAGT | ---- | ACAAGATGTGCAGGAGGCAGCTGATC  | GATG | ---- | TTTCTCTCTCATG  | ---- | ATGTTTCTAACTCTCTATC | ---- | TCTCTCCCTTCCCTCTCT  |
| NW005871066.1 7 | : | GC | GGGCAC | AC | CCCCACT | ---- | GGGGGGCTGCAGGAGGCAGCTGATC   | GATG | ---- | TTTCTCTCTCATG  | ---- | ATGTTTCTAACTCTCTATC | ---- | CCTCTCCCTTCCCTCTCT  |
| NW005871054.1 8 | : | GC | GGGCAC | AT | CCCCAGT | ---- | AGGAGTGTGCAGGAGGCAGCTGATA   | GATG | ---- | TTTCTCTCTCATG  | ---- | ATGTTTCTAACTCTCTATC | ---- | CCTCTCCCTTCCCTCTCT  |
| NW005871136.1 4 | : | GC | GGGCAC | AT | CCCCAGT | ---- | AGGAGGTGTGCAGGAGGCAGCTAATC  | GATG | ---- | TTTCTCTCTCATG  | ---- | ATGTTTCTAACTCTCTATC | ---- | TCTCTCCCTTCCCTCTCT  |
| NW005872463.1 7 | : | GC | AGGCAC | AT | CCCCAGT | ---- | AGGACATGTGCAGGAGGCAGCTGATC  | GATG | ---- | TCTCTCTCTCATG  | ---- | ATGTTTCTAACTCTCTATC | ---- | TCTCTCCCTTCCCTCTCT  |
| NW005871333.1 4 | : | GC | GGGCAC | AT | CCCCAGT | ---- | GGGGGATGTGCAGGAGGCAGCTGATC  | GATG | ---- | TTTCTCTCTCATG  | ---- | ATGTTTCTAACTCTCTATC | ---- | ACTCTCCCTTCCCTCTCT  |
| NW005871106.1 4 | : | GC | GGGCAC | AT | CCCCAGT | ---- | GGGGGATGTGCAGGAGGCAGCTGATC  | AATG | ---- | TTTCTCTCTCATG  | ---- | ATGTTTCTAACTCTCTATC | ---- | TCTCTCCCTTCCCTCTCT  |
| NW005871059.1 1 | : | GC | GGGCAC | AT | CCCCTGT | ---- | GGGACATGTGCAGGAGGCAGCTGATC  | AGTG | ---- | TTTCTCTCTCATG  | ---- | ATGTTTCTAACTCTCTATC | ---- | CCTCTCCCTTCCCTCTCT  |
| NW005871121.1 4 | : | GC | GGTAC  | AT | CCCCAGT | ---- | AGGACATGTGCGGGAGGCAGCTGATC  | GATG | ---- | TTTCTCTCTCATG  | ---- | ATGTTTCTAGCTCTCTATC | ---- | TCTCTCCCTTCCCTCTCT  |
| NW005871624.1 7 | : | GC | GGGCAC | AT | CCCCAGT | ---- | GGGGGATGTGCGGGAGGCAGCTGATC  | GATG | ---- | TTTCTCTCTCATC  | ---- | ATGTTTCTAGCTCTCTCTC | ---- | TCTCTCCCTTCCCTCTCT  |
| NW005871207.1 1 | : | GC | AGGCAC | AT | CCCCAGT | ---- | AGGACAAAGTGCAGGAGGCAGCTGGTC | GATG | ---- | TTTCTCTCTCATG  | ---- | ATGTTTCTAGCTCTCTATC | ---- | TCTCTCCCTTCCCTCTCT  |
| NW005871210.1 1 | : | GC | GGGCAC | AT | CCCCAGT | ---- | GGGGGATGTGCAGGAGGCAGCTGATC  | GATG | ---- | TTTCTCTCTCATC  | ---- | ATGTTTCTAACTCTCTATC | ---- | TCTCTCCCTTCCCTCTCT  |
| NW005871354.1 8 | : | GC | GGGCAC | AT | CCCCAGT | ---- | AGGACATGTGCAGGAGGCAGCTGATC  | GATG | ---- | TTTCTCTCTCATC  | ---- | ATGTTTCTAACTCTCTATC | ---- | TCTCTACCTTCCCTCTCT  |
| NW005871413.1 9 | : | GT | GGGCAC | AT | CCCCAGT | ---- | GGGACATGTGTAGGAGGCAGCTGATC  | GATG | ---- | TTTCTCTCTCATG  | ---- | ATGTTTCTTACTCTCTCTC | ---- | TCTCTCCCTTCCCTCTCT  |
| NW005872128.1 3 | : | GC | GGGCAC | AT | CCCCAGT | ---- | GGGACATGTGCAGGAGGCAGCTGGTC  | GATG | ---- | TTTCTCTCTCATG  | ---- | ATGTTTCTAACTCTCTATC | ---- | TCTCTCCCTTCCCTCTCT  |
| NW005871081.1 6 | : | GC | GGGCAC | AT | CCCCAGT | ---- | AGGACATGTGTAGGAGGCAGCTGATC  | GATG | ---- | TTTCTCTCTCATG  | ---- | ATGTTTCTAACTCTCTATC | ---- | TCTCTACCTTCCCTCTCT  |
| NW005871180.1 4 | : | GC | GGGCAC | AT | ACCCAGT | ---- | AGGAGTGTACAGGAGGCAGCTGATT   | GATG | ---- | TTTCTCTCTCATG  | ---- | ATGTTTCTAACTCTCTATC | ---- | CCTCTCCCTTCCCTCTCT  |
| NW005872499.1 5 | : | GT | GGGCAC | AT | CCCCAGT | ---- | AGGAGTGTGCAGGAGGCAGCTGATC   | GATG | ---- | TTTCTCTCTCATG  | ---- | ATGTTTCTAACTCTCTATC | ---- | CCTCTCCCTTCCCTCTCT  |
| NW005871056.1 9 | : | TC | GGGCAC | AT | CCCCAGT | ---- | GGGAGTGTGCAGGAGGCAGCTGATC   | GATG | ---- | TTTCTCTCTCATG  | ---- | ATGTTTCTAACTCTCTATC | ---- | CCTCTCCCTTCCCTCTCT  |
| NW005871108.1 3 | : | GC | GGGCAC | AT | CCCCAGT | ---- | GGGAGTGTGCAGGAGGCAGCTGATC   | GATG | ---- | TTTCTCTCTCATG  | ---- | ATGTTTCTAGCTCTCTATC | ---- | CCTCTTCCCTTCCCTCTCT |
| NW005871462.1 6 | : | GC | GGGCAC | AT | CCTCAGT | ---- | AGGGGGTGTGCAGGAGGCAGCTGATC  | AATG | ---- | TTTCTCTCTCATC  | ---- | ATGTTTCTAACTCTCTATC | ---- | CCTCTCCCTTCCCTCTCT  |
| NW005871275.1 1 | : | GC | GGGCAC | AT | CCCCAGT | ---- | AGGAGTGTGCAGGAGGCAGCTGATC   | AATG | ---- | TTTCTCTCTCATG  | ---- | ATGTTTCTAGCTCTCTATC | ---- | CCTCTCCCTTCCCTCTCT  |
| NW005871068.1 9 | : | GC | AGGCAC | AT | CCCCAGT | ---- | AGGAGTGTGCAGGAGGCAGCTGATC   | GATG | ---- | TTTCTCTCTCATC  | ---- | ATGTTTCTAACTCTCTATC | ---- | CCTCTCCCTTCCCTCTCT  |
| NW005871068.1 7 | : | GC | GGGCAC | AT | CCCCAGT | ---- | AGGGGGTGTGCAGGAGGCAGCTGATC  | GATG | ---- | TTTCTCTCTCATC  | ---- | ATGTTTCTAACTCTCTATC | ---- | TCTCTCCCTTCCCTCTCT  |
| NW005871137.1 2 | : | GC | GGGCAC | AT | CCCCAGT | ---- | GGGAGTGTGCAGGAGGCAGCTGATC   | GATG | ---- | TTTCTCTCTCATC  | ---- | ATGTTTCTAACTCTCTATC | ---- | TCTCTCCCTTCCCTCTCT  |
| NW005871641.1 3 | : | GT | GGGCAC | AT | CCCCAGT | ---- | GGGACATGTGCAGGAGGCAGCTGATC  | GATG | ---- | TTTCTCTCTCATG  | ---- | ATGTTTCTAACTCTCTATC | ---- | TCTCTCCCTTCCCTCTCT  |
| NW005871055.1 1 | : | GC | GGGCAC | AT | CCCCAGT | ---- | AGGGGGTGTGCAGGAGGCAGCTGATC  | GATG | ---- | TTTCTCTCTCATG  | ---- | ATGTTTCTAACTCTCTATC | ---- | CCTCTCCCTTCCCTCTCT  |
| NW005871095.1 5 | : | GC | GGGCAC | AT | CCCCAGT | ---- | GGGGGGTGTGCAGGAGGCAGCTGATC  | GATG | ---- | TTTCTCTCTCATG  | ---- | ATGTTTCTAGCTCTCTCTC | ---- | CCTCTCCCTTCCCTCTCT  |
| NW005871236.1 1 | : | GC | GGGTAC | AT | CCCCAGT | ---- | AGGGGGTGTGCAGGAGGCAGCTGATT  | GATG | ---- | TTTCTCTCTCATG  | ---- | ATGTTTCTAACTCTCTATC | ---- | CCTCTCCCTTCCCTCTCT  |
| NW005871062.1 5 | : | GC | GGGCAC | AT | CCCCAGT | ---- | GGGAGTGTGCAGGAGGCAGCTGATC   | AATG | ---- | TTTCTCTCTCATG  | ---- | ATGTTTCTAACTTCTATC  | ---- | CCTCTCCCTTCCCTCTCT  |
| NW005871049.1 6 | : | GC | AGGCAC | AT | CCCCAGT | ---- | AGGAGTGTGCAGGAGGCAGCTGGTC   | GATG | ---- | TTTCTCTCTCATC  | ---- | ATGTTTCTAGCTCTCTATC | ---- | CCTCTCCCTTCCCTCTCT  |
| NW005871051.1 3 | : | GC | AGGCAC | AT | CCCCAGT | ---- | AGGGGGTGTGCAGGAGGCAGCTGATC  | AATG | ---- | TTTCTCTCTCACTG | ---- | ATGTTTCTAACTCTCTATC | ---- | CCTCTCCCTTCCCTCTCT  |
| NW005871065.1 1 | : | GC | AGGCAC | AT | CCCCAGT | ---- | AGGAGTGTGCAGGAGGCAGCTGATC   | GATG | ---- | TTTCTCTCTCATG  | ---- | ATGTTTCTAACTTCTATC  | ---- | CCTCTCCCTTCCCTCTCT  |
| NW005871058.1 9 | : | GT | GGCCAC | AT | CCCCAGT | ---- | AGGAGTGTGCAGGAGGCAGCTGATT   | GATG | ---- | TTTCTCTCTCATC  | ---- | ATGTTTCTAACTCTCTATA | ---- | CCTCTCCCTTCCCTCTCT  |
| NW005871064.1 1 | : | GT | GGGCAC | AT | CCCCAGT | ---- | AGGGGGTATGCAGGAGGCAGCTAATT  | GATG | ---- | TTTCTCTCTCATC  | ---- | ATATTTCTAACTCTCTATC | ---- | CCTCTCCCTTCCCTCTCT  |
| NW005871050.1 2 | : | GC | GGGCAC | AT | CCCTAGT | ---- | AGGACATGTGCAGGAGGCAGCTGATC  | GATG | ---- | TTTCTCTCTCATC  | ---- | ATGTTTCTAA          | ---- | CTATC               |
| NW005871077.1 8 | : | GC | GGGCAC | AT | CCCCAGT | ---- | AGGAGTGTGCAGGAGGCAGCTGATT   | GATG | ---- | TTTCTCTCTCATG  | ---- | ATGTTTCTAA          | ---- | CTATC               |
| NW005871117.1 2 | : | GT | GGGCAC | AT | CCCCAGT | ---- | GGGGGATGTGCAGGAGGCAGCTGATC  | GATG | ---- | TTTCTCTCTCATG  | ---- | ATGTTTCTAATCTCTATC  | ---- | CCTCTCCCTTCCCTCTCT  |
| NW005871344.1 1 | : | GT | GGGCAC | AT | CCCCAGT | ---- | AGGGGGTGTACAGGAGGCAGCTGATC  | GATG | ---- | TGCTCTCTCATG   | ---- | ATGTTTCTAACTCTCTATC | ---- | CCTCTCCCTTCCCTCTCT  |
| NW005871473.1 6 | : | GT | GGGCAC | AT | TCCCAGT | ---- | AGGGGGTGTGCAGAGACAGCTGATT   | GATG | ---- | TTTCTCTCTCATC  | ---- | ATGTTTCTAACTCTCTATC | ---- | CACCTCCCTTCCCTCTCT  |

NW005871982.1 2 : GT--GGGCAC-AT-CCCCAGT-----AGGGACCTGTCAGGAGGCAGCTGATC-AATG-TTTCTCTCTCATCA-----ATGTTTCTGACTTTCTATC--CTCTCTTTCTCTCTCT  
NW005875779.1 4 : GC--GGGCAC-AT-CCCCAGA-----GGGACATGTGTCAGGAGGCAGCTGGTC-GATG-TTTCTCTCTCATCG-----ATGTTTCTGGCTCTCCATC--CTCTCTTCTTCCCTCTCT  
NW005871833.1 1 : GT--GGGCAC-AT-CCCCAGT-----AGGGGGCTGAAGGAGGCAGCTGATC-GATG-TTTCTCTCTCTGTG-----ATGTTTCTAACTCTCTACC--CTCTCTCCCTTCTTCTCT  
NW005871115.1 1 : GC--GGGCAC-AT-CCCCAGT-----TGGGGGTGTGTCAGGAGGCAGCTGATC-AATG-TTTCTCTCTCATCG-----ATGTTTCTAACTCTCTATC--CTCTCTCCCTTCCCTCTCT  
NW005871152.1 1 : GC--GGGCAC-AT-CCCCAGT-----CGGAGGTGTGTCAGGAGGCAGCTGATC-TATG-TTTCTCTCTCATCG-----ATGTTTCTAACTCTCTATC--CTCTCTCCCTTCCCTCTCT  
NW005871048.1 5 : GC--AGGCAC-AT-CCCCAGT-----GAGGGGTGTGTCAGGAGGCAGCTGATC-AATG-CTTCTCTCTCATCG-----ATATTTTCTAACTCTCTATC--CTCTCTCCCTTCCCTCTCT  
NW005871311.1 1 : GC--GGGCAC-AT-CCCCAGT-----GGGGGGCTGTCAGGAGGCAGCTGATGTTGATG-TTTCTCTCTCATCG-----ATGTTTCTAACTCTCTATC--CTCTCTCCCTTCCCTCTCT  
NW005871051.1 2 : GC--AGGCAC-AT-CCCCAGT-----AGGAGTGTGTAGGAGGCAGCTGATC-GATA-TTTCTCTCTCATCG-----ATGTTTCTAACTCTCTAT--CTCTCTCCCTTCCCTCTCT  
NW005871155.1 2 : GC--GGGCAC-AT-CCCCAGT-----GGGAGGTGTGTCAGGAGGCAGCTGATC-AATG-TTTCTCTCTCATCG-----ATGTTTCTAATCTCTATC--CTCTCTCCCTTCCCTCTCT  
NW005872153.1 3 : GC--GGGCAC-AT-CCCCAGT-----GGGGGGCTGTCAGGAGGCAGCTGATC-GA-----TCTCTCTCATCA-----ATGTTTCTAACTCTCTATC--CTCTCTCCCTTCTTCTCT  
NW005871148.1 4 : GC--AGGCACAAT-CCCCAGT-----AGGACATGTGTCAGGAGGCAGCTGATT-GATG-TTTCTCTCTCATCA-----ATGTTTCTAACTCTCTATC--CTCTCTCCCTTCCCTCTCT  
NW005871082.1 2 : GT--GGGCAC-AT-CCCCAGT-----AGGAGGTGTGTAGGAGGCAGCTGATC-GATG-TTTCTCTCTCATCG-----ATGTTTCTAACTCTCTATC--CTCTCTCCCTTCCCTCTCT  
NW005871337.1 1 : GT--GGGCAC-AT-CCCCAGT-----AAGGGGTGTGTCAGGAGGCAGCTGATC-GATG-TTTCTCTCTCATCG-----ATGTTTCTA--CTCTATC--CTCTCTCCCTTCCCTCTCT  
NW005871065.1 1 : GC--GGGCAC-AT-CCCCAGT-----GGGGGCCGTGTCAGGAGGCAGCTGATC-GA-----TCTCATCATCG-----ATGTTTCTAGCTCTCTATC--CTCTCTCCCTTCTTCTCT  
NW005871165.1 3 : GC--GGGCAC-AT-CCCCACT-----GGGGGGCTGTCAGGAGGCAGTTGATC-GA-----TCTCTCTCATCG-----ATGTTTCTAACTCTCTATC--CTCTCTCCCTTCTTCTCT  
NW005871073.1 3 : GA--GGACTC-----GGACCATGCAGGAGACAGCCAATC-AGTG-AGTCTCTCTATTAT--TGATGTTTCTATCTTCTCTC--CTCTCTCCCTTCCCTCTCT  
NW005871563.1 1 : GC--GGGCTCTAT-CCCCAGT-----AGGGGTTCATGTCAGGAGGCAGCCAATC-AATG-ATTCTC-ATCAC--TGATGTTTCTCATCTCTCTC--CTACTACCTTCCCTCTCT  
NW005871431.1 9 : GC--GGTCAC-AT-CCCCAGC-----TGGGATGTGTCAGGAGGCCTGATC-AATG-TTTCTCTCTCATCA-----ATGATTCTAACTCTCTATC--CTTTCCCTTCCCTCTCT  
NW005871069.1 9 : GC--AGGCAC-AT-CCCCAGT-----AGGGGGTAGGCAGGAGGCAGCTAATT-GATG-TTTCTCTCTCATCA-----ATGTTTCTGACTCTCTAT--CTCTCTCCCTTCCCTCTCT  
NW005871112.1 3 : GT--GGGCAC-AT-CCCC-----GGAGGCAGCTGATC-GATG-TTTCTCTCTCATCG-----ATGTTTCTGACTCTCTATC--CTCTCTCCCTTCCCTCTCT  
NW005871096.1 5 : GC--GGGCAC-AT-CCCCAGT-----AGGAGTGTGTCAGGAGGCAGCTGATC-AATG-TTTCTCTCTCATCG-----ATGTTTCTAACTCTCTATC--CTCTACCCCTTCTTCTCT  
NW005871270.1 3 : GT--GGGCAC-AT-ACCCAGT-----GGGAGTGTGTCAGGAGGCAGCTGGTC-----GATGTTTCTGGCTCTCTATC--CTCT-CTTCTCTCTCT  
NW005871767.1 1 : GT--GGGCAC-AT-CCCCAGT-----GGGAAGTGTGTCAGGAGGCAGCTGATC-A-----ATGTTTCTAACTCTCTATC--CTCTCTCCCTTCTTCTCT  
NW005871176.1 3 : GC--GGGCAC-AT-CCCCAGT-----GGGAGGTGTGTCAGGAGGCAGCTGATC-GATG-----TTTCTAA--CTATC--TCTCTCCCTTCCCTCTCT  
NW005871060.1 1 : GC--GGGCTCGGT-CCCCAGT-----GGGGGTGTGTCAGGAGGCAGCCAATC-GATG-TTTTCTCTCATCA-----ATGTTTCTAA--CTATC--CTCTCTCCCTTCCCTCTCT  
NW005871091.1 4 : GC--GGGCTCGAT-CCCCAGT-----AGGAGGTGTGCA--AAGGCAGCCAAC--AATG-ATTCTCTCTCATCAT--TGATGTTTCTACCTCTCTCTC--CTCTCTCCCTTCCCTCTCT  
NW005871534.1 3 : GT--GGGCTCCAT-CCCCAGT-----GGGGGCCGTGTCAGGAGGCAGATGATC-AATG-ATTCTCTCTCATCAT--TGATGTTTCTATCTCTCTCTC--TCTCTCCCTTCCCTCTCT  
NW005871346.1 5 : GT--GGGCTCAGT-CCCCAGT-----GGGGGGTGTGTCAGGAGGCAGCTGATA-AATG-ATTCTCTCTCATCTGT--TGATGTTTCTGTG--TCTCTCCCTTCCCTCTCT  
NW005871075.1 2 : GC--GGGCTCAGT-TCCAAAT-----AGGGGTTCATGTCAGGAGGCAGCCAATC-AATG-ATTCTCTCTTATCAT--TGATGTTTCTATCTCTCTCTC--CTCTCTCCCTTCCCTCTCT  
NW005871048.1 1 : GC--AGGCTCGAT-CTCTAGT-----AGGAGGTGTGTCAGGAGGCAGCCACTC-AATG-ATTCTCTCTCATCAC--TGATGTTTCTATCTCTTTCTC--CTCTCTCCCTTCCCTCTCT  
NW005871088.1 8 : TC--AGGCTCAAT-CCCTTGT-----AGGAGCATGTCAGGAGGCAGCCAATC-AATG-ATTCTCTCTCATCAT--TGATGTTTCTATCTCTCTCTC--CTTTCCCTTCCCTCTCT  
NW005871126.1 9 : GC--AGGCTCGAT-CCCTAGT-----AGGAGTATGTAGGAGGCAGCCAATC-AATG-ATTCTCTCTCATCAT--TGATGTTTCTCTCTCTCTCTC--CTCTCTCCCTTCCCTCTCT  
NW005871419.1 8 : GC--AGGCTCAAT-CCCCAGT-----AGTCAGCATGTCAGGAGGTAGCCAATT-CTG-ATTCTCTCTCATCAT--TGATGTTTCTATCTCTATTTC--CTTTCCCTTCCCTCTCT  
NW005871067.1 7 : GT--GGGCTCGAT-CCCCAGT-----GGGGGGCTGTGCAAGGCAGCTGATC-AATG-ATTCTTTCTCATCAT--TAAAGTTTCTA--TCTCTCTC--ACTCTCCCTTCCCTCTCT  
NW005871349.1 1 : TC--AGGCTTGAT-CACCAGT-----AGGGGCATGCGGAGGCAGCCAATC-AGTG-ATTCTCTC-CATCAT--TGATGTTTCTATCTCTCTCTC--CTCTCCCTTCCCTCTCT  
NW005871109.1 5 : TC--GGGCTAGAT-CCCCAGT-----AGGGGGTGTGTCAGGAGGCAGCTGATC-AATG-ATTCTCTCTCATCAT--TGATGTTTCTATCTCTATCTC--CTGTCCCTTCCCTCTCG  
NW005874004.1 1 : GC--AGGTTCAAT-CCCCAGT-----GAGGGGTATGTCAGGAGGCAGCGATC-AATG-ATTCTCTCTCATCAT--TGATGTTTCTATCCTCTCTCAA--CTATCCCTTCCCTCTCT  
NW005871206.1 6 : GC--GGGCTCGAT-CCCCAGT-----AAGGGGCTGCTGGAGGCAGCCGATC-AATG-ATTCTCTCTCATCAT--TGATGTTTCTATCTCTC--CTTCTCCCTTCCCTCTAT  
NW005871123.1 4 : GT--GGGCTTGAT-TCCAGC-----AGGCACATGTCAGGAGGCAGCTGATC-AGTG-ATTCTCTCTCATCAT--TGATGATTCT--TCTCTCTC--CTTCTCCCTTCCCTCTCT  
NW005871055.1 6 : GT--GGGCTCGAT-CCCCAGT-----AGAGGGCTGTCAGGAGGCAGCCAATC-AATG-ATTCTCTCTTATCAT--TGATGTTTCTATCTCTCTCTC--TTTGCTCCCTTCCCTCTCT  
NW005871068.1 9 : GT--GGTCTTGAT-CCCCAGT-----AGGGGGCTGTCAGGTTGCAGCCAATC-AATGAATATTCTTTCTCATCAT--TGATAATTCTATCTCTCTCTC--CTCTCTTCTTCCCTGCTCT  
NW005871516.1 4 : GC--AGGCTCCAT-TCTCAGTA-----GGGGGGCATGTCAGGAGGCAGCCAATC-CATG-ATTCTCTCTCATTAT--TGATGTTTCTATCTC--TCTCTCCCTTCTTCTCT  
NW005871085.1 3 : GT--GGGCTTGGT-CCCCACT-----AGGGGGCTGTCAGGAGGCAGCCAATA-AATG-ATTCTCTCTCATCAT--TAAAGTTTCTATCTCTC-----CTCTCTCT  
NW005871063.1 5 : GTGGGGCTTGT-TTCCAGT-----GGGGACATGTCAGGAGGCAGCCAATC-AATG-ATTCTCTCTCATCAT--TGATGTTTCTATCTCTC-----CTCTCTCCCTTCTGCTCT  
NW005871093.1 5 : GT-----GGGGCATGTCAGGAGGCAGCCAATC-AATG-ATTCTCTCTCATCAT--TGATGTTTCTATCTCTC-----CTCTCTCCCTTCCCTCTTT  
NW005881170.1 2 : GC--GGACTCCAT-CCCCCGGT-----AGGGGGCTGTCAGGAGGCAGCCAATC-CATG-ATTCTCTCTCATCAT--GGATGTTTCTA--TCTCTCTC--CTCTCCCTTCCCTCTCT  
NW005871097.1 6 : GC--GGGCTCGAT-CCCCAGT-----GGGGGGCTGTCAGGAGGCAGCTGATC-AATG-ATTCTCTCTCATCAG--TGATGTTTCT--TCTCTCTC--CTCTCCATGCTCTCTCT  
NW005871464.1 5 : AT--GGGCTTGAT-CCCCAGT-----GGGGGGCTGTCAGGAGGCAGCCAATC-AATG-TTCTCTCTCTCTT--TGATGTTTCTATCTCTCTCTC--CTCTTCCCTTCCCTCTCT  
NW005871049.1 2 : GT--GGGCTCAAT-CCCCAAT-----AGGGGGCATGTCAGGAGGCAGTCAATC-AATG-ATTCTCTCTGATCAT--TGATGTTTCTATCTCTATCTC--CTTTTCTTCCCTCTCT  
NW005871111.1 3 : GC--AGGCTCAAT-CCCCAGT-----AGGGGGCATGTCAGGAGGCAGCCGATC-AATC-AT-----TGATGTTTCTCTCTCTCTCTCC--CTCTCTCCCTTCCCTCTCT  
NW005871143.1 1 : GC--GGGCTCGAT-CCCTAGT-----GGGGCCGTGTCAGGAGGCAGCTGATC-AATG-ATGTTTCTA--TCTCTCTC--CTCAACCTTCCCTCTCT  
NW005872372.1 5 : GC--TGGCTCCAT-CCCCAGT-----GGGGGGCTGTAGGTGGCAGTGATC-AATG-ATTCTCTCTTATCAT--TGATGTTTCTATCTTCTCTC--CTCTCTCCCTTCCCTCTCT  
NW005871909.1 5 : GT--GGGCTCGAT-CCCCAGT-----GGGGGGTGTGTCAGGAGGCAGCCGATC-ATG-ATTCTCTCTCATCAT--TGATGTTTCTATCTC-----TTTCTCCCTTCTCTCT  
NW005875787.1 1 : GT--GGGCTCAAT-CCCCAGT-----ATGGGGCATGTCAGGAGGCAGCTGATC-GATG-ATTCTCTCTCATCAT--TGATGTTTCTATCTCTCTCTC--GATATCCCTTATATA  
NW005872538.1 1 : GC--GGGCTCGGT-CC-----AACCTGTCAGGAGGCAGCCGATC-AATG-ATTCTCTCTCATCAT--GGATGTTTCTA--TCTCTCTC--TCTCTCTCTCTCTCT  
NW005876019.1 8 : GC--GGGCTTGAT-CCCCAGT-----AGGGGCACTGCAAGAGGCAGCCAATT-GATG-ATTCTCTCTCATCATTTCATGATGTTTCTA--TCTCTCTC--CTCTCTCCCTTCCCTCTCT  
NW005871054.1 8 : GT--GGGCTTGAT-CCCCAAT-----AGGGGGTGTTCAGGAGGCAGCCGATC-AATG-ATTCTCTCTCATCAT--TGATGTTTCTCTT-----CTCTCTCCCTTCCCTCTCT

NW005871074.1 1 : -----CCAGT-----AGGGCGTGTGCAGGAGGCAGCCATC-AATG--ATTCTCTCTCATCAT---TGATGTTTCTATCTC-CTCCC--CTCTCTCCCTTCCCTCTCT  
NW005871068.1 3 : TT-GGGCTAGAT-CCCCAGT-----GGGGGGTGTGCAGGAGGCAGCCATC-AATG--TTCTCTCTCTCATCAT---CGATATTTTCTGTCTCTCTCTC-CTCTCTCCCTTCCCTCTCT  
NW005871151.1 6 : TT-GGGCTTCAT-CCCCACT-----GTGGGT-----CAGCCATC--AGG--ATTCTCTCTCATCAT---TGATGTTTCTATCTCTCTCT-CTCTCTCCCTTCCCTCTCT  
NW005872725.1 2 : GT--GGCTTGAT-CCCCAGTGGGGGGGGGGGGGAGGGGGCAGCAGGAGGCAGCCAAATC-AATG--ATTCTCTCTCATCAT---TGATGTTTCTATC-----TCTCCCTCTTCCCTCTCT  
NW005871311.1 1 : GC--GACTCAAT-TTCCAGT-----AGGGGTGTACAGAGGTAGCCTATC-AATG--ATTC-CTCTCATCAC---TGATGTTTCTATCTCTCTTTC-CTCTCTTCTTCCCTCTCT  
NW005871048.1 6 : GC-AGGCAC-AT-CCCCAGT-----AGTGGGTGTGTAGGAAGCAGCTGATC-AATG--CTTCTCTCTCATCG-----ATGTTTCTAACTCTCTATC-CTCTCTCCCTTCCCTCGCT  
NW005871163.1 1 : GC-CGGCTCGAT-CCCCAGT-----AGGGGTGTGTGCAGGAGGCAGCCAAATC-GATGATGTTTCTCTCTCATCA-----ATGTTTCTATCTTCTCTATC-CTCTCTCTTCCCTCTCT  
NW005871179.1 3 : --GGTTCAAT-CCCCATT-----AGGGGTGTGCTGGAGGTGTGACATCTAGCATGACCAAAACCATGAGCTTTTCTCCATTCCGTTACGTATAATTCAACCAATGTAGGTGTA  
NW005871172.1 1 : GC-AGACTGAT-CCCAGC--CTGGGTCAAGGCATATGCAGGAGGCAACCCATC-GATG--TGTCTGACATCG-----ATGTCCTCTCTCTCTCTCTC-TCTCTCCCCCTCTCTCTT  
NW005871095.1 2 : GC-AGTTTCCAT-CCCCAGC--CTCCTACTAGGGTCTAGTGTGTCAGGCAACCAATC-GATG--TTCTCTGACATAT---TGTTCCTCTCTCTCTCTC-TCTCTCTCTCTCTCTCT  
NW005871196.1 3 : GC-AGGTTCAAT-CCCCAGA--TTTGGTTGGGCAATGATGGGAGGCAACCAATC-GATG--TGCTCTCTCTCA-CAT---CAATATTTCTCTCTCTCTCTC--TCTCTCTCTCTCTCTCT  
NW005871133.1 1 : GC-AG-----CAGAGGAAGAGTGTGGAGGCAACCAATC-TATG--TGCTCTCTCTCA-CAT---TGATGTTTCTCTCTCTCTC--TCTCTTTCTCTCTATATCT

260 280 300 320 340 360  
\* \* \* \* \*  
Ves\_a : GT--AAAAAATCAATAAAATAATATTTTAAAAA-----  
NW005871638.1 2 : GT--AAAAAATCAATAAAA-TATATTTTAAAAAAGAGAAAGTCACCTCTGTATCCATGTGAAAAATCAGAGTCTTGTACCTCTCCCAGGGAGAGGTCTGGAGAGAGAGCAAGAA  
NW005871332.1 6 : GT--AAAAAATCAATAAAA-TATATTTTAAAAAACAACAATACTATTAGCTACACGACGGACTTTAAGTCATGCTCACCCTGTCTCCACCAGCATCTCTCTTCTGCCCTAAGACACAATC  
NW005871213.1 2 : GT--AAAAAATCAATAAAATAATATTTTAAAAAATCAACAATATAATTCTTAATAGTGAAAGTGCAGTGATAGGGCTAAAAATCAAAGCCATGGATAACACCAAAATGCTGATAGGAAGT  
NW005871780.1 1 : GT--AAAAAATCAATAAAA-TATAATTTTAAAAAACAACAACAACAAGAGGACATGGGCCAGCTGGCGAGGGTGAAGAAGAGGACCTTACCAAGGAGCTATTATTGTGAT  
NW005871324.1 2 : GT--AAAAAATCAATAAAA-TATATTTTAAAAAAGAGTCTCAAGTGTGACATCTAGCATGACCAAAACCATGAGCTTTTCTCCATTCCGTTACGTATAATTCAACCAATGTAGGTGTA  
NW005871062.1 1 : GT--AAAAAATCAATAAAA-TATATTTTAAAAATGTGAGATGAGGAGTTTATCTTGGGTCTCTTGGCAAGCCCAAGGTATTCACTGGGTCTGTAAAGTCAGAGAGGAGGCAGGAG  
NW005871108.1 5 : GT--AAAAAATCAATAAAA-TATAATTTAAAAATAAAATAAAATAGATGTCCTTATTGTACTTTATCTCTTTATAGATCAAGTGTGTAGAGAAGGCAACCAGTGCATTGCTTTCATGTT  
NW005871153.1 9 : AT--AAAAAATCAATAAAA-TATATTTAAAAATAAAATAAAATGTCATCATAATTGCTTACTTTACTTATTTTACTTATTTTACTTATTTAGTGAACACTTTAAAAAATAACATTTGCTTCTGACTCT  
NW005871076.1 7 : GT--AAAAAATCAATAAAA-TATATTTTAAAAAATAAAATGAGCTTACTTACTTATTTTATTTTATTTTACTTATTTTACTTATTTTACTTATTTTACTTATTTTACTTATTTTACTTATTTT  
NW005871066.1 7 : GT--AAAAAATCAATAAAA-TATATTTTAAAAAAGATGTGAGCATGGGATCTCCAAGGGCTCCAAGAGAAATGGAGAAAAATCACTCACCTTTGTTGTTGTTTCTCACACCTCAACTCCATGG  
NW005871054.1 8 : GT--AAAAAATCAATAAAA-TACTTAAAAAATAAATAAAATAAAATATCAATCAATTCACAGAATTTTCAACCAGCTCACCTCCATACTTATACCAACACATCAGCATGCATTTCAGTA  
NW005871136.1 4 : GT--AAAAAATCAATAAAA-TATATTTAAAAAAGAATCCTAAACAAAAATCCAGGGAAGGAGAAATATCTAGTTGAAAAATATGGAATATACATGAAGAGTACTAGAAAGGGTAGTGG  
NW005872463.1 7 : GT--AAAAAATCAATAAAA-TATATTTTAAAAAATACTATGGATACCAATGTGCTGGTACATGTGCGTAACTTTGGATACACAGAAGAAAAACACAGGAAAAAATTCATATACAG  
NW005871333.1 4 : GT--AAAAAATCAATAAAA-TATATTTTAAAAAATTTTATAAAATAAATATATAAAAGCATATAATTTTAAAAACATAAAATATGAATGGGGAATTTTATCAACCTCAGGGGAGAGGC  
NW005871106.1 4 : GT--AAAAAATCAATAAAA-TATATTTAAAAAATCTTCCATTTTATCATATCTTATCATTTGTTTATGATGCTTTTTTTTAAATCCCAAAATTCAAATTTTGGGTTTATAGTAAATGTAT  
NW005871059.1 1 : GT--AAAAAATCAATAAAA-TATATTTAAAAAACAACAACAACAAGAGACTTCAGAGGAAGTAGATGCTTGTGGGAATTCATTTGTAGAAAACGATGCTAGAGTAACACTCCA  
NW005871121.1 4 : GT--AAAAAATCATTAATAA-TATATTTAAAAAAGAAACCTTTGAGTTTAGGTAAAGATTAAGAGGCGATAGTTTAAAGCACTATTAAATATAGGGAATAAGCAAAATTCACGCTT  
NW005871624.1 7 : GT--AAAAAATCAATAAAA-TATATTTAAAAAAGAGGGTACACCTGGAGTGACGAGAACTCCTGTTACATAGTTGGGCTCATCTCTTACCTCTTCTACATCTTCAAGTTTCC  
NW005871207.1 1 : GT--AAAAAATCAATAAAA-TATATTTAAAAAAGAAACTTGCAGATGCATACAAACATAATCTGTCTTTCAGCTAATACCTGCATTGCTTGTATGCATCAAGTTATGGCTGGACTATA  
NW005871210.1 1 : GT--AAAAAATCAATAAAA-TATATTTAAAAATATTTCTTCTAATTAATTTCTTTCAATGTGCACAAATTCGTGCACCAGGCCACTAGTACTGTAATGACAATGTATGGTGTACATGGGT  
NW005871354.1 8 : GT--AAAAAATCAATAAAA-AATAATTTAAAAATAAATAAATGAGTGTGAGGTTTAAAGTGGCTCTAATTTGCTTTTTCACTACTATTTTTACTTTCTCGTATTACCTTGGAGA  
NW005871413.1 9 : GT--AAAAAATCAATAAAA-TATATTTAAAAAAGTAAGTCTTCAATTTTCCAAAGCAACCAAGAGGACATTTCCAGATGTGAAGTGATGGTCTTTGTACAATTTTCAT  
NW005872128.1 3 : GT--AAAAAATCAATAAAA-TATATTTAAAAAATATATACAGAGATCCAACAGCAGACTAGAGGATCCCAAGAATCAAGTCAAAGATTTGAAACACGAAGAAGCAAAAAACATCCATCTGG  
NW005871081.1 6 : GT--AAAAAATCAATAAAA-TATATTTAAAAATAATAATTTAGGTAAACATTACTGACTGTATGAAATGGTATTTGTTGTTTTTACTATTTTATGTCCCCACATTAAGGCAGATTTAAGG  
NW005871180.1 4 : TT--AAAAAATCAATAAAA-TATATTTAAAAAGGGGGGAGGGTAGTGGAGTAATCTCCTGTAAGTAACTACATCAAGCCTTAATTACTTTAAATTTTTTCACTTTAAATTTTTTCGCTT  
NW005872499.1 5 : GT--AAAAAATCAATAAAA-TGCAATTTAAAAAATTTCTAGAGTGTAGGTTAACTATTTTGTCCCTGGAACACAGCTTTTCCCTGATGATAAATATATAACTATTTCTTTTATTT  
NW005871056.1 9 : GT--AAAAAATCAATAAAA-TATATTTAAAAAATCCACAGTGGATGCCTTTTCAATTTCTGTGAAAAGGGAGCTCGCACTTCTCTGTCTGTGTTGAAATGTTGCCTTTTTTCTTACAAT  
NW005871108.1 3 : GT--GGAAATCAATAAAA-TATATTTAAAAATGCTATACAAATGGAATCATACAGTATGTAACCTTTCGGGATGACTTTTGTGTTGTTGTTAATCCTCACCTGAGGATATTTTCCCC  
NW005871462.1 6 : GT--AAAAAATCAATAAAA-TATATTTAAAAATTCATAGTAAATTTAAAGTGCTATTTGCATATTTGAAAGTTACTGAGAGAATAGATCTTAAAGTTCTCATGACAAAGAAATTTTA  
NW005871275.1 1 : GT--AAAAAATCAATAAAG-TATATTAACAAAATAAATGATGAGTATTAATGAGGTTTGGATGACCTTACATAGCATGATGAGGTTGACTTAGAGTTGACTGAAGATTTAGTTTGA  
NW005871068.1 9 : GT--AAAAAATCAATAGAA-TATATTTTAAAAATGTGTCTTAAATTTGTGCATCTTCTTCATTTGTTAATTATACAAAAACAATAATATGTTTATGTCTATAACAATATTGACTTTTAC  
NW005871068.1 7 : GT--AAAAAATCAATAAAA-TATATTTTAAAAATGTATCAACATGAAAAAGAAATGCAACAGAAACAAACTAATCTAAATGGGTATACCTTATTCATGGAGAATCCATTAGCATTATTGA  
NW005871137.1 2 : GT--AAAAAATCAATAAAA-AATAATTTAAAAAAGATTGGAAGACATGCTTTTATTTCTGATCCATGAATATTTATCATCTACTGTTTGGGAACCCCATAGAATTTTTTCTTCTAA  
NW005871641.1 3 : GT----AAATCAATAAAA-TATATTTAAAAAATAAACACTACTTTTATTAATTTCAAAGTGTGTGTATACATTTTGGGGGATACACTATATATGTCTCATTTGACCAAGTTTAAAG  
NW005871055.1 1 : GT--AAAAAATCAATAAAA-TATATAATTTTAAAAAGAAATAAACATGAAATTTAAATGTAGAAGCCTGAGTAGCTCATTTTGTCCAAAAGATTTACAAAGCAACTTTGGCAGCCTTAAATGT  
NW005871095.1 5 : GTAAAAAATCAATGAAA-TATATTTAAAAAAGAACTAGCCCATGAATTTAACTTTGGAAGCACTGGAGAGTGTGTGCATTGAGAAGCCTTCTGCTACATGCATTAAATGAAC  
NW005871236.1 1 : GTAAAAAATTAATAAAA-TATATTTTAAACATCCCTATCTAATAAGAGGGAATATGCTAATTTGACCTCACATTGTTGCACGATGGCAGCACCACAGCCAATAAGGATGGAATATGCTA  
NW005871062.1 5 : GT--AAAAAATTAATAAAA-TATATTTATAAAAACAACAGATGGTATTGTGCAGATAAACAACATGATGGAACAGAATAGATAGCCAGCTATAAAACCATGATATATGGATAGA  
NW005871049.1 6 : GT--AAAAAATCAATAAAA-TATATTTTAAAAAATTTTAAATGAGAGACATTTGTCTGTGATAACAAATAGATGAAAGCTGTGGTGAATGCACAGGATAGATCATCTGCAGCAAT  
NW005871051.1 3 : GT--AAAAAATAAGTAAATAAATTTTAAAAAGAGGGAATGAAGAGTGTAGTAATGAAGCCATGATGTAAGTCCATTGACTGGCAGGACAGTCTGTGAGGTACACATAATTATCTCTT  
NW005871065.1 1 : GTAAAAAATCAATAAAA-TATATTTTAAAAAGGTTAGTGGTTCTAGGCCATAGCTGAGCGAAAGACTGACCTCATTTCTAGACTGTTTTGTTTTGAGTTGTCTAGGTGCTGCTT



[illegible]
