# Supplementary material for: Analysis of SINE Families B2, Dip, and Ves with Special Reference to Polyadenylation Signals and Transcription Terminators
Source: MDPI journal article supplement (doi:10.3390/ijms22189897), 2021-09-13
Supplement: s1 [file s1]

**Table S8**  
**Dip poly(A) in *Allactaga bullata***

|                          | <b>Dip (all)</b> |         | <b>DipA</b> |         | <b>DipB</b> |         |
|--------------------------|------------------|---------|-------------|---------|-------------|---------|
| <b>A<sub>6-7</sub></b>   | 64.0%            | 228,490 | 72.8%       | 139,903 | 53.7%       | 88,587  |
| <b>A<sub>8-9</sub></b>   | 17.9%            | 63,839  | 15.9%       | 30,581  | 20.2%       | 33,258  |
| <b>A<sub>10-14</sub></b> | 12.0%            | 42,825  | 8.7%        | 16,744  | 15.8%       | 26,081  |
| <b>A<sub>15-19</sub></b> | 4.1%             | 14,733  | 2.0%        | 3,811   | 6.6%        | 10,922  |
| <b>A<sub>20-29</sub></b> | 1.8%             | 6,415   | 0.5%        | 958     | 3.3%        | 5,457   |
| <b>A<sub>≥30</sub></b>   | 0.2%             | 855     | 0.1%        | 119     | 0.5%        | 736     |
| <b>total</b>             |                  | 357,157 |             | 192,116 |             | 165,041 |

Copy numbers and percentage are shown.
