# Supplementary material for: Analysis of SINE Families B2, Dip, and Ves with Special Reference to Polyadenylation Signals and Transcription Terminators
Source: MDPI journal article supplement (doi:10.3390/ijms22189897), 2021-09-13
Supplement: s1 [file s1]

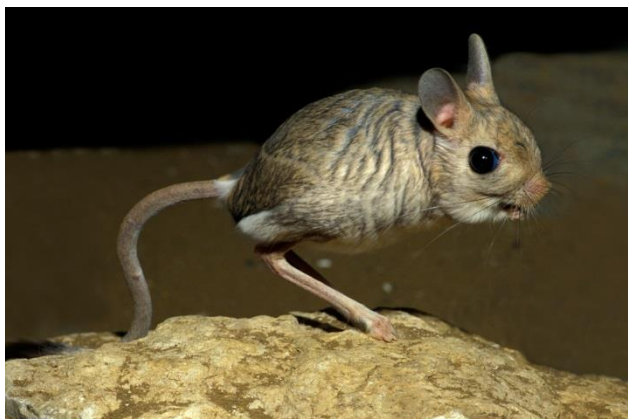

**Gobi jerboa** *Allactaga bullata*

**Table S7**  
**Incidence of  $TNT_m A_n$  patterns ( $\geq 5\%$  &  $>1$  sequence) in**  
**Dip\_a (487,241 sequences) and Dip\_b (154,759 sequences) banks**

|                   | Dip_a             |       |        |                    |       |        | Dip_b             |       |        |                    |       |       |
|-------------------|-------------------|-------|--------|--------------------|-------|--------|-------------------|-------|--------|--------------------|-------|-------|
|                   | A <sub>5-10</sub> |       |        | A <sub>11-20</sub> |       |        | A <sub>5-10</sub> |       |        | A <sub>11-20</sub> |       |       |
| T <sub>2</sub>    | T <sub>2</sub>    | 100%  | 65480  | T <sub>2</sub>     | 100%  | 11,438 | T <sub>2</sub>    | 100%  | 25,261 | T <sub>2</sub>     | 100%  | 6,261 |
| TNT               | T <sub>2</sub>    | 59.0% | 31,615 | TCT                | 39.5% | 289    | T <sub>2</sub>    | 60.2% | 13,698 | TCT                | 81.3% | 610   |
|                   | TAT               | 25.8% | 13,857 | TCT                | 31.8% | 233    | TCT               | 23.4% | 5,324  | TAT                | 9.6%  | 72    |
|                   | TCT               | 8.1%  | 4,364  | TGT                | 28.7% | 210    | TAT               | 12.5% | 2,842  | TGT                | 9.1%  | 68    |
|                   | TGT               | 7.1%  | 3,781  |                    |       |        | TGT               | 4.0%  | 901    | TAT                | 1.7%  | 2     |
| TNT <sub>2</sub>  | T <sub>4</sub>    | 41.9% | 17,435 | n/a                |       |        | T <sub>4</sub>    | 71.2% | 6,201  | n/a                |       |       |
|                   | TAT <sub>2</sub>  | 39.2% | 16,317 |                    |       |        | TAT <sub>2</sub>  | 16.8% | 1,462  |                    |       |       |
|                   | TCT <sub>2</sub>  | 13.0% | 5,418  |                    |       |        | TCT <sub>2</sub>  | 8.4%  | 730    |                    |       |       |
|                   | TGT <sub>2</sub>  | 5.8%  | 2,407  |                    |       |        | TGT <sub>2</sub>  | 3.6%  | 316    |                    |       |       |
| TNT <sub>3</sub>  | TAT <sub>3</sub>  | 44.6% | 15,646 | n/a                |       |        | T <sub>5</sub>    | 68.1% | 3,408  | n/a                |       |       |
|                   | T <sub>5</sub>    | 30.9% | 10,829 |                    |       |        | TAT <sub>3</sub>  | 17.7% | 886    |                    |       |       |
|                   | TCT <sub>3</sub>  | 17.9% | 6,275  |                    |       |        | TCT <sub>3</sub>  | 8.6%  | 430    |                    |       |       |
|                   | TGT <sub>3</sub>  | 6.6%  | 2,296  |                    |       |        | TGT <sub>3</sub>  | 5.6%  | 282    |                    |       |       |
| TNT <sub>≥4</sub> | TAT <sub>4</sub>  | 20.4% | 13,113 | n/a                |       |        | T <sub>6</sub>    | 27.7% | 1,633  | n/a                |       |       |
|                   | TAT <sub>5</sub>  | 18.6% | 11,935 |                    |       |        | T <sub>7</sub>    | 16.8% | 988    |                    |       |       |
|                   | TAT <sub>6</sub>  | 15.4% | 9,930  |                    |       |        | T <sub>8</sub>    | 10.4% | 616    |                    |       |       |
|                   | T <sub>6</sub>    | 8.8%  | 5,687  |                    |       |        | TAT <sub>4</sub>  | 10.2% | 600    |                    |       |       |
|                   | TAT <sub>6</sub>  | 6.9%  | 4,411  |                    |       |        | TAT <sub>5</sub>  | 7.0%  | 414    |                    |       |       |
|                   | T <sub>7</sub>    | 5.5%  | 3,540  |                    |       |        | Others            | 27.9% | 1,653  |                    |       |       |
|                   | Others            | 24.4% | 16,205 |                    |       |        |                   |       |        |                    |       |       |

## Terminator statistics:

|                                     | Dip_a A <sub>5-10</sub> |       |
|-------------------------------------|-------------------------|-------|
| Terminator                          | copy number             |       |
| TVT, TT                             | 87,482                  | 33.5% |
| TVTT, TTT                           | 55,757                  | 21.4% |
| TVTTT, TTTT                         | 41,652                  | 16%   |
| TVT <sub>≥4</sub> , T <sub>≥5</sub> | 75,650                  | 29%   |
| Total:                              | 260,541                 |       |

|                                     | Dip_b A <sub>5-10</sub> |       |
|-------------------------------------|-------------------------|-------|
| Terminator                          | copy number             |       |
| TVT, TT                             | 34,328                  | 52%   |
| TVTT, TTT                           | 16,206                  | 24.6% |
| TVTTT, TTTT                         | 7,799                   | 11.8% |
| TVT <sub>≥4</sub> , T <sub>≥5</sub> | 7,557                   | 11.4% |
| Total:                              | 65,890                  |       |

(V = A, C or G)
