# Supplementary material for: Analysis of SINE Families B2, Dip, and Ves with Special Reference to Polyadenylation Signals and Transcription Terminators
Source: MDPI journal article supplement (doi:10.3390/ijms22189897), 2021-09-13
Supplement: s1 [file s1]

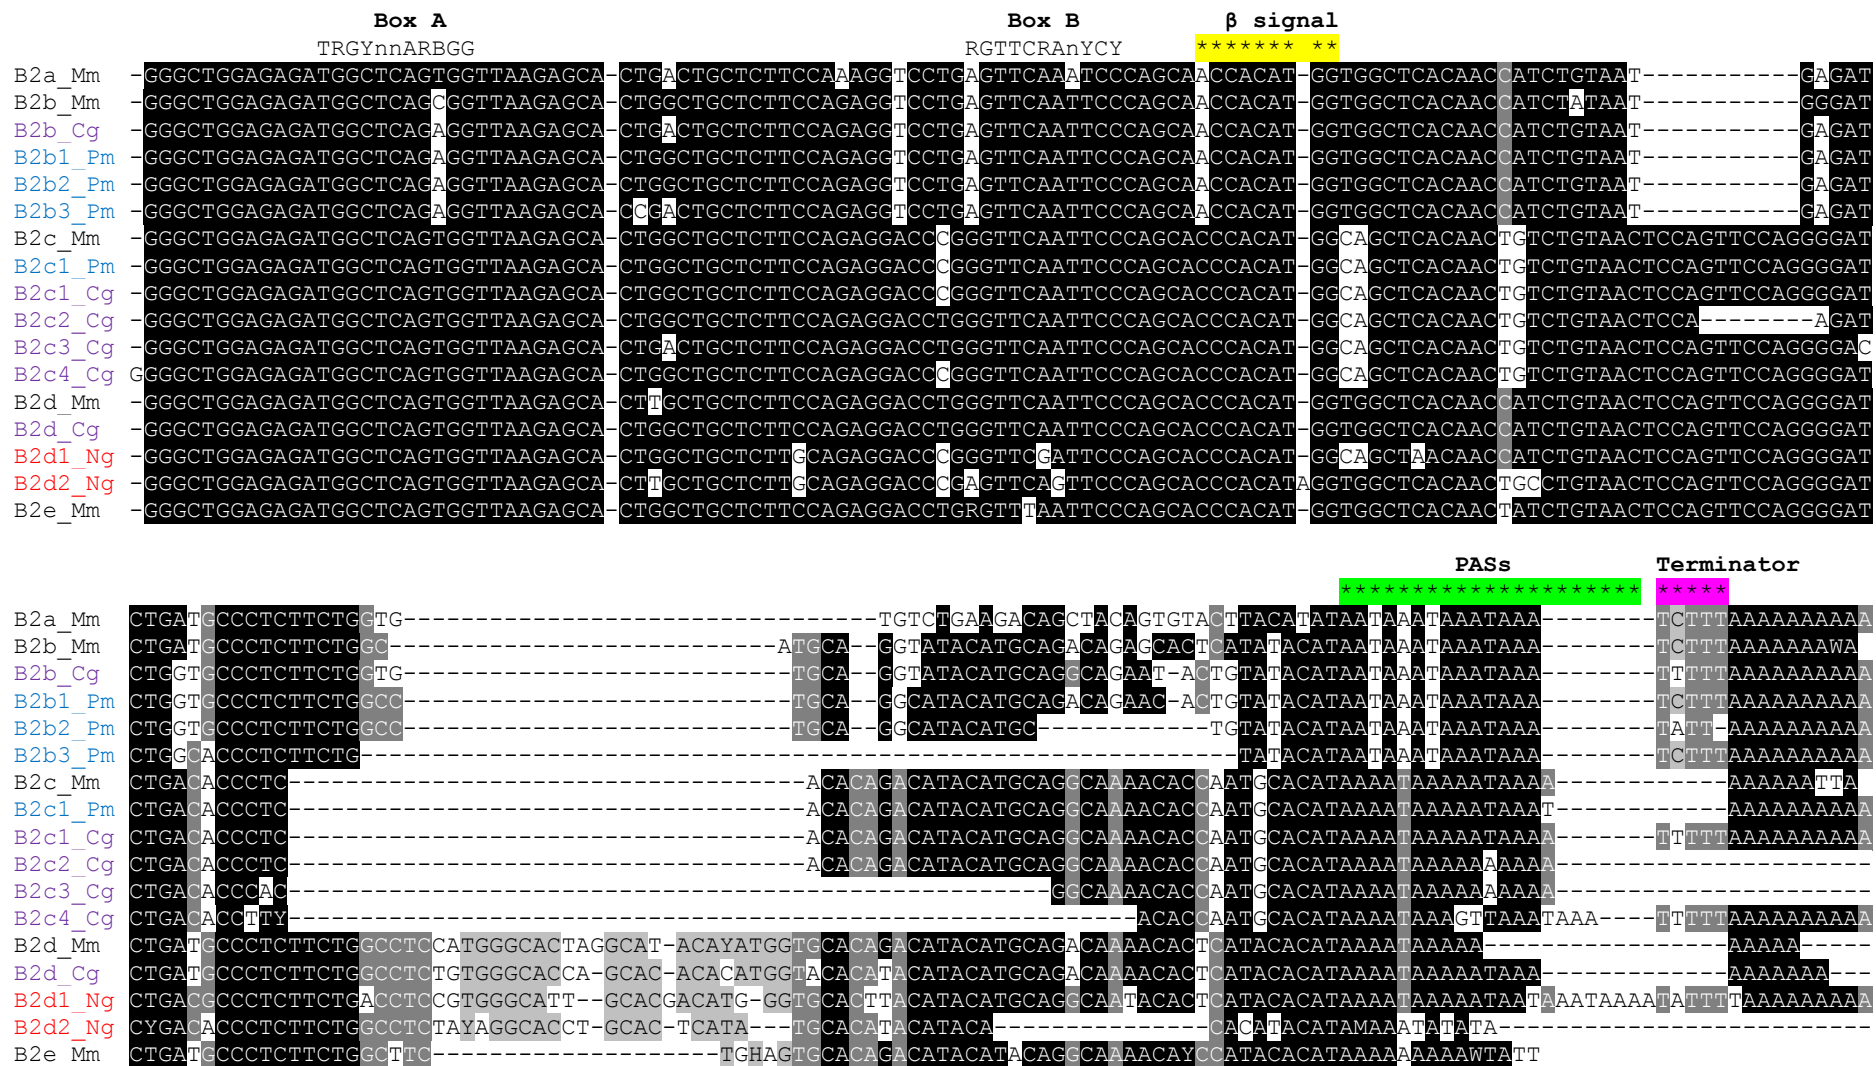

**Figure S2.** Consensus sequences of B2 subfamilies from cricetids *Cricetulus griseus* (Cg) and *Peromyscus maniculatus* (Pm), as well as from a spalacid *Nannospalax galili* (Ng). B2 subfamilies from the *Mus musculus* (Mm) are shown for comparison. Consensus sequences of the A and B boxes of pol III promoter are shown above the alignment.  $\beta$  signal, PASs, and pol III transcription terminator are marked by asterisks in different colors.
