# Supplementary material for: Analysis of SINE Families B2, Dip, and Ves with Special Reference to Polyadenylation Signals and Transcription Terminators
Source: MDPI journal article supplement (doi:10.3390/ijms22189897), 2021-09-13
Supplement: s1 [file s1]

Dip\_al  
FVKW010029880.1\_5939-6304  
FVKW010123555.1\_105-415  
FVKW010025796.1\_6249-6562  
FVKW010031136.1\_18232-18590  
FVKW010512513.1\_0-351  
FVKW0100414374.1\_3172-3528  
FVKW010004937.1\_55362-55672  
FVKW010068616.1\_7282-7593  
FVKW010019971.1\_23823-24131  
FVKW010035815.1\_1680-2042  
FVKW010071648.1\_2103-2413  
FVKW010012871.1\_4677-4987  
FVKW010062373.1\_4521-4909  
FVKW010117824.1\_717-1027  
FVKW010017875.1\_2160-2517  
FVKW010114290.1\_1521-1837  
FVKW010024039.1\_17969-18280  
FVKW010076367.1\_3113-3422  
FVKW010003904.1\_40312-40619  
FVKW010762154.1\_0-256  
FVKW010009938.1\_56852-57161  
FVKW010035511.1\_15524-15834  
FVKW010059132.1\_1051-1424  
FVKW010014211.1\_3538-3844  
FVKW010010117.1\_17929-18238  
FVKW010007795.1\_60640-60995  
FVKW010009058.1\_5033-5343  
FVKW010018275.1\_6792-7156  
FVKW010004236.1\_59608-59918  
FVKW010317879.1\_257-520  
FVKW010011019.1\_19328-19639  
FVKW010017996.1\_26165-26470  
FVKW010025399.1\_26088-26394  
FVKW010052169.1\_1175-1526  
FVKW010014669.1\_36517-36829  
FVKW010009837.1\_2859-3163  
FVKW010040824.1\_16748-17102  
FVKW010039548.1\_1210-1512  
FVKW010013864.1\_43684-44030  
FVKW010038710.1\_1024-1390  
FVKW010093353.1\_1222-1599  
FVKW010043016.1\_1774-2133  
FVKW010001104.1\_70627-70981  
FVKW010033826.1\_17327-17688  
FVKW010031454.1\_10908-11280  
FVKW010027811.1\_2558-2868  
FVKW010000312.1\_6823-7131  
FVKW010002277.1\_51663-51947  
FVKW010177368.1\_713-1059  
FVKW010001669.1\_82795-83102  
FVKW010028655.1\_918-1227  
FVKW010021718.1\_34140-34508  
FVKW010012382.1\_50706-51000  
FVKW010009322.1\_17203-17549  
FVKW010054064.1\_3936-4288  
FVKW010055721.1\_651-961  
FVKW010002098.1\_79231-79520  
FVKW010020247.1\_8618-8920  
FVKW010014293.1\_38902-39209  
FVKW010038451.1\_447-758  
FVKW010018145.1\_23709-24082  
FVKW010054819.1\_3957-4267  
FVKW010001947.1\_23503-23807  
FVKW010046559.1\_8571-8933  
FVKW010004641.1\_38510-38871  
FVKW010044890.1\_8790-9096  
FVKW010004620.1\_31405-31712  
FVKW010014263.1\_26957-27301  
FVKW010031182.1\_1824-2168  
FVKW010026462.1\_3826-4122  
FVKW010010360.1\_15040-15330  
FVKW010022364.1\_26739-27018  
FVKW010509200.1\_44-370  
FVKW010009771.1\_29586-29931
