# Supplementary material for: Analysis of SINE Families B2, Dip, and Ves with Special Reference to Polyadenylation Signals and Transcription Terminators
Source: MDPI journal article supplement (doi:10.3390/ijms22189897), 2021-09-13
Supplement: s1 [file s1]

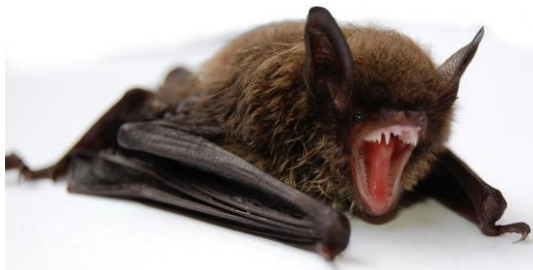

**Little brown bat**

*Myotis lucifugus*

**Table S9**

**Incidence of  $TNT_m A_n$  patterns ( $\geq 5\%$  &  $>1$  sequence) in **Ves\_a** (155,132 sequences), **Ves\_b** (154,451 sequences), and **Ves\_c** (25,157 sequences) banks**

|                   | Ves_a             |       |        |                    |       |        | Ves_b               |       |     |                   |       |        | Ves_c              |       |       |                     |       |      |
|-------------------|-------------------|-------|--------|--------------------|-------|--------|---------------------|-------|-----|-------------------|-------|--------|--------------------|-------|-------|---------------------|-------|------|
|                   | A <sub>5-10</sub> |       |        | A <sub>11-20</sub> |       |        | A <sub>&gt;20</sub> |       |     | A <sub>5-10</sub> |       |        | A <sub>11-20</sub> |       |       | A <sub>&gt;20</sub> |       |      |
| T <sub>2</sub>    | T <sub>2</sub>    | 100%  | 30,838 | T <sub>2</sub>     | 100%  | 10,050 | T <sub>2</sub>      | 100%  | 507 | T <sub>2</sub>    | 100%  | 23,427 | T <sub>2</sub>     | 100%  | 1,220 | T <sub>2</sub>      | 100%  | 10   |
| TNT               | T <sub>3</sub>    | 70.7% | 21,789 | TAT                | 54.6% | 220    | TAT                 | 64.0% | 16  | T <sub>3</sub>    | 65.5% | 14,766 | TCT                | 47.7% | 53    | T <sub>3</sub>      | 65.1% | 1916 |
|                   | TAT               | 17.2% | 5,292  | TCT                | 22.8% | 92     | TCT                 | 24.0% | 6   | TAT               | 18.3% | 4,126  | TCT                | 31.5% | 35    | TAT                 | 18.6% | 546  |
|                   | TGT               | 6.1%  | 1,880  | TGT                | 22.6% | 91     |                     |       |     | TCT               | 8.5%  | 1,915  | TGT                | 20.7% | 23    | TCT                 | 8.9%  | 261  |
|                   | TCT               | 6.1%  | 1,877  |                    |       |        |                     |       |     | TGT               | 7.7%  | 1,727  |                    |       |       | TGT                 | 7.4%  | 219  |
| TNT <sub>2</sub>  | T <sub>4</sub>    | 68.0% | 13,785 | n/a                |       |        | n/a                 |       |     | T <sub>4</sub>    | 71.0% | 8,973  | n/a                |       |       | T <sub>4</sub>      | 55.8% | 627  |
|                   | TAT <sub>2</sub>  | 23.8% | 4,816  |                    |       |        |                     |       |     | TAT <sub>2</sub>  | 15.6% | 1,972  |                    |       |       | TAT <sub>2</sub>    | 24.8% | 279  |
|                   | Others            | 8.2%  | 1,662  |                    |       |        |                     |       |     | TCT <sub>2</sub>  | 8.1%  | 1,026  |                    |       |       | TCT <sub>2</sub>    | 10.4% | 117  |
|                   |                   |       |        |                    |       |        |                     |       |     | TGT <sub>2</sub>  | 5.3%  | 674    |                    |       |       | TGT <sub>2</sub>    | 8.9%  | 100  |
| TNT <sub>3</sub>  | T <sub>5</sub>    | 56.4% | 9,367  | n/a                |       |        | n/a                 |       |     | T <sub>5</sub>    | 66.1% | 5,639  | n/a                |       |       | T <sub>5</sub>      | 55.4% | 394  |
|                   | TAT <sub>3</sub>  | 35.5% | 5,890  |                    |       |        |                     |       |     | TAT <sub>3</sub>  | 19.3% | 1,646  |                    |       |       | TAT <sub>3</sub>    | 25.6% | 182  |
|                   | Others            | 8.1%  | 1,345  |                    |       |        |                     |       |     | TCT <sub>3</sub>  | 9.3%  | 794    |                    |       |       | TCT <sub>3</sub>    | 12.5% | 89   |
|                   |                   |       |        |                    |       |        |                     |       |     | TGT <sub>3</sub>  | 5.3%  | 449    |                    |       |       | TGT <sub>3</sub>    | 6.5%  | 46   |
| TNT <sub>≥4</sub> | T <sub>6</sub>    | 20.4% | 6,431  | n/a                |       |        | n/a                 |       |     | T <sub>6</sub>    | 28.7% | 3,049  | n/a                |       |       | T <sub>6</sub>      | 21.2% | 394  |
|                   | T <sub>7</sub>    | 16.6% | 5,219  |                    |       |        |                     |       |     | TAT <sub>4</sub>  | 14.3% | 1,520  |                    |       |       | T <sub>7</sub>      | 15.4% | 166  |
|                   | TAT <sub>5</sub>  | 13.8% | 4,345  |                    |       |        |                     |       |     | TAT <sub>5</sub>  | 12.1% | 1,281  |                    |       |       | TAT <sub>4</sub>    | 11.2% | 120  |
|                   | TAT <sub>4</sub>  | 13.7% | 4,316  |                    |       |        |                     |       |     | T <sub>7</sub>    | 12.0% | 1,279  |                    |       |       | TAT <sub>5</sub>    | 10.3% | 111  |
|                   | TAT <sub>6</sub>  | 11.3% | 3,546  |                    |       |        |                     |       |     | TAT <sub>6</sub>  | 6.3%  | 673    |                    |       |       | T <sub>8</sub>      | 8.1%  | 87   |
|                   | TAT <sub>7</sub>  | 7.9%  | 2,496  |                    |       |        |                     |       |     | Others            | 26.6% | 2,826  |                    |       |       | TAT <sub>6</sub>    | 7.1%  | 76   |
|                   | T <sub>8</sub>    | 5.8%  | 1,835  |                    |       |        |                     |       |     |                   |       |        |                    |       |       | Others              | 26.7% | 287  |
|                   | Others            | 10.5% | 3,310  |                    |       |        |                     |       |     |                   |       |        |                    |       |       |                     |       |      |

### Terminator statistics

| Ves_a A <sub>5-10</sub>             |         |       |  |
|-------------------------------------|---------|-------|--|
| T <sub>2</sub> , TVT                | 39,887  | 30.7% |  |
| T <sub>3</sub> , TVT <sub>2</sub>   | 28,267  | 21.7% |  |
| T <sub>4</sub> , TVT <sub>3</sub>   | 21,020  | 16.1% |  |
| T <sub>≥5</sub> , TVT <sub>≥4</sub> | 40,865  | 31.4% |  |
| Total                               | 130,039 |       |  |

| Ves_b A <sub>5-10</sub>             |        |       |  |
|-------------------------------------|--------|-------|--|
| T <sub>2</sub> , TVT                | 31,195 | 40.0% |  |
| T <sub>3</sub> , TVT <sub>2</sub>   | 18,438 | 23.7% |  |
| T <sub>4</sub> , TVT <sub>3</sub>   | 11,907 | 15.3% |  |
| T <sub>≥5</sub> , TVT <sub>≥4</sub> | 16,267 | 20.9% |  |
| Total                               | 77,807 |       |  |

| Ves_c A <sub>5-10</sub>             |        |       |  |
|-------------------------------------|--------|-------|--|
| T <sub>2</sub> , TVT                | 5,798  | 53.7% |  |
| T <sub>3</sub> , TVT <sub>2</sub>   | 2,412  | 22.3% |  |
| T <sub>4</sub> , TVT <sub>3</sub>   | 944    | 8.8%  |  |
| T <sub>≥5</sub> , TVT <sub>≥4</sub> | 1,635  | 15.2% |  |
| Total                               | 10,789 |       |  |

V = A, C or G
