# Supplementary material for: Analysis of SINE Families B2, Dip, and Ves with Special Reference to Polyadenylation Signals and Transcription Terminators
Source: MDPI journal article supplement (doi:10.3390/ijms22189897), 2021-09-13
Supplement: s1 [file s1]

Fig. 1

Fig. 1 displays a detailed alignment of the 1000 Genomes Project (1KGP) reference genome (GRCh38) with the human genome (hg38). The alignment is presented as a grid of colored blocks, where each block represents a specific genomic region. The color coding indicates the type of variant or feature: red for SNPs, green for indels, blue for structural variants, and yellow for other genomic features. The alignment is organized into columns, with each column representing a specific genomic region. The rows represent the alignment of the 1KGP reference genome (GRCh38) with the human genome (hg38). The alignment is presented as a grid of colored blocks, where each block represents a specific genomic region. The color coding indicates the type of variant or feature: red for SNPs, green for indels, blue for structural variants, and yellow for other genomic features. The alignment is organized into columns, with each column representing a specific genomic region. The rows represent the alignment of the 1KGP reference genome (GRCh38) with the human genome (hg38).
