# Supplementary material for: Analysis of SINE Families B2, Dip, and Ves with Special Reference to Polyadenylation Signals and Transcription Terminators
Source: MDPI journal article supplement (doi:10.3390/ijms22189897), 2021-09-13
Supplement: s1 [file s1]

NW00587104 : AGTAAATGATGTTTACAAATCTTAAGACACGCGGTTGGCTCAGGATAGAGCGTGGCTCGAGATGAAGGGCCCGGGTTCGATTGGTCAAGGGCATGTACCTGGTGGGGGCACATCCAGTAGGAGATGTGCAGAGGCGCTGCATGATGTTTCTCTTCATGAT  
 NW00587104 : TTTCACAAAGTTTAAAGAAATGAAAAAACCAGCAACCGGTTGGCTCAGGATAGAGCGTGGCTCGAGATGAAGGGCCCGGGTTCGATTGGTCAAGGGCATGTACCTGGTGGGGGCACATCCAGTAGGAGATGTGCAGAGGCGCTGCATGATGTTTCTCTTCATGAT  
 NW00587110 : GCATCTACATTTAAAAAATGAAGAACTCCGCAACCGGTTGGCTCAGGATAGAGCGTGGCTCGAGATGAAGGGCCCGGGTTCGATTGGTCAAGGGCATGTACCTGGTGGGGGCACATCCAGTAGGAGATGTGCAGAGGCGCTGCATGATGTTTCTCTTCATGAT  
 NW00587145 : TAAGTGGCTTTTAAAAAAGAAATGTATCCGCAACCGGTTGGCTCAGGATAGAGCGTGGCTCGAGATGAAGGGCCCGGGTTCGATTGGTCAAGGGCATGTACCTGGTGGGGGCACATCCAGTAGGAGATGTGCAGAGGCGCTGCATGATGTTTCTCTTCATGAT  
 NW00587115 : ACTGTACATTTAAAAATGGTTACAATTTGCAACCGGTTGGCTCAGGATAGAGCGTGGCTCGAGATGAAGGGCCCGGGTTCGATTGGTCAAGGGCATGTACCTGGTGGGGGCACATCCAGTAGGAGATGTGCAGAGGCGCTGCATGATGTTTCTCTTCATGAT  
 NW00587113 : TCTTCCATATTTAAAAAGCAAAACACGCAACCGGTTGGCTCAGGATAGAGCGTGGCTCGAGATGAAGGGCCCGGGTTCGATTGGTCAAGGGCATGTACCTGGTGGGGGCACATCCAGTAGGAGATGTGCAGAGGCGCTGCATGATGTTTCTCTTCATGAT  
 NW00587207 : CCTCAGTTTATGGAATGCGGTCACITTCGCAACCGGTTGGCTCAGGATAGAGCGTGGCTCGAGATGAAGGGCCCGGGTTCGATTGGTCAAGGGCATGTACCTGGTGGGGGCACATCCAGTAGGAGATGTGCAGAGGCGCTGCATGATGTTTCTCTTCATGAT  
 NW00587110 : CAGCTATAAGTATTAGAAAGTAGTATTCGCAACCGGTTGGCTCAGGATAGAGCGTGGCTCGAGATGAAGGGCCCGGGTTCGATTGGTCAAGGGCATGTACCTGGTGGGGGCACATCCAGTAGGAGATGTGCAGAGGCGCTGCATGATGTTTCTCTTCATGAT  
 NW00587105 : GAGTCACCTTTAAAAAAATATAGATTTCGCAACCGGTTGGCTCAGGATAGAGCGTGGCTCGAGATGAAGGGCCCGGGTTCGATTGGTCAAGGGCATGTACCTGGTGGGGGCACATCCAGTAGGAGATGTGCAGAGGCGCTGCATGATGTTTCTCTTCATGAT  
 NW00587115 : GGCATGAAAAATCCAGCAGTCTACACCTTCGCAACCGGTTGGCTCAGGATAGAGCGTGGCTCGAGATGAAGGGCCCGGGTTCGATTGGTCAAGGGCATGTACCTGGTGGGGGCACATCCAGTAGGAGATGTGCAGAGGCGCTGCATGATGTTTCTCTTCATGAT  
 NW00587107 : ATGGTAACTTTAGATTAGATTCTCTTCGCAACCGGTTGGCTCAGGATAGAGCGTGGCTCGAGATGAAGGGCCCGGGTTCGATTGGTCAAGGGCATGTACCTGGTGGGGGCACATCCAGTAGGAGATGTGCAGAGGCGCTGCATGATGTTTCTCTTCATGAT  
 NW00587106 : GACCCCACTTTGAAAGTAAATCCCTTCGCAACCGGTTGGCTCAGGATAGAGCGTGGCTCGAGATGAAGGGCCCGGGTTCGATTGGTCAAGGGCATGTACCTGGTGGGGGCACATCCAGTAGGAGATGTGCAGAGGCGCTGCATGATGTTTCTCTTCATGAT  
 NW00587104 : TAAATATTTTAAATTCCTTACGTTTCGCAACCGGTTGGCTCAGGATAGAGCGTGGCTCGAGATGAAGGGCCCGGGTTCGATTGGTCAAGGGCATGTACCTGGTGGGGGCACATCCAGTAGGAGATGTGCAGAGGCGCTGCATGATGTTTCTCTTCATGAT  
 NW00587120 : AAACGACATATAAAAGAAATATATCTGTTTCGCAACCGGTTGGCTCAGGATAGAGCGTGGCTCGAGATGAAGGGCCCGGGTTCGATTGGTCAAGGGCATGTACCTGGTGGGGGCACATCCAGTAGGAGATGTGCAGAGGCGCTGCATGATGTTTCTCTTCATGAT  
 NW00587105 : ATTTTTGATTGAAGATAGACAAATTCGCAACCGGTTGGCTCAGGATAGAGCGTGGCTCGAGATGAAGGGCCCGGGTTCGATTGGTCAAGGGCATGTACCTGGTGGGGGCACATCCAGTAGGAGATGTGCAGAGGCGCTGCATGATGTTTCTCTTCATGAT  
 NW00587104 : GACCATCCCATATAAAGATTGTGACGTTTCGCAACCGGTTGGCTCAGGATAGAGCGTGGCTCGAGATGAAGGGCCCGGGTTCGATTGGTCAAGGGCATGTACCTGGTGGGGGCACATCCAGTAGGAGATGTGCAGAGGCGCTGCATGATGTTTCTCTTCATGAT  
 NW00587105 : TCGCAGAGATGTAAAGAGGTGTCTCTCGCAACCGGTTGGCTCAGGATAGAGCGTGGCTCGAGATGAAGGGCCCGGGTTCGATTGGTCAAGGGCATGTACCTGGTGGGGGCACATCCAGTAGGAGATGTGCAGAGGCGCTGCATGATGTTTCTCTTCATGAT  
 NW00587106 : TTTCATATAACAGCAAGGATTAATCCCTTCGCAACCGGTTGGCTCAGGATAGAGCGTGGCTCGAGATGAAGGGCCCGGGTTCGATTGGTCAAGGGCATGTACCTGGTGGGGGCACATCCAGTAGGAGATGTGCAGAGGCGCTGCATGATGTTTCTCTTCATGAT  
 NW00587107 : TTATCTCTTTAAAAAGGAATAAACCGCAACCGGTTGGCTCAGGATAGAGCGTGGCTCGAGATGAAGGGCCCGGGTTCGATTGGTCAAGGGCATGTACCTGGTGGGGGCACATCCAGTAGGAGATGTGCAGAGGCGCTGCATGATGTTTCTCTTCATGAT  
 NW00587112 : AGCTCGTCGGTATAAGCAACAAATTCGCAACCGGTTGGCTCAGGATAGAGCGTGGCTCGAGATGAAGGGCCCGGGTTCGATTGGTCAAGGGCATGTACCTGGTGGGGGCACATCCAGTAGGAGATGTGCAGAGGCGCTGCATGATGTTTCTCTTCATGAT  
 NW00588166 : GGTGAAGGATTTAAGAGTACAGACTTCGCAACCGGTTGGCTCAGGATAGAGCGTGGCTCGAGATGAAGGGCCCGGGTTCGATTGGTCAAGGGCATGTACCTGGTGGGGGCACATCCAGTAGGAGATGTGCAGAGGCGCTGCATGATGTTTCTCTTCATGAT  
 NW00587105 : ATACACTGACTAAAAAAGAAGATAATTCGCAACCGGTTGGCTCAGGATAGAGCGTGGCTCGAGATGAAGGGCCCGGGTTCGATTGGTCAAGGGCATGTACCTGGTGGGGGCACATCCAGTAGGAGATGTGCAGAGGCGCTGCATGATGTTTCTCTTCATGAT  
 NW00587163 : ATCCAGCAATATCTTGAAGAAAAATACGCAACCGGTTGGCTCAGGATAGAGCGTGGCTCGAGATGAAGGGCCCGGGTTCGATTGGTCAAGGGCATGTACCTGGTGGGGGCACATCCAGTAGGAGATGTGCAGAGGCGCTGCATGATGTTTCTCTTCATGAT  
 NW00587104 : TTACTACTGATTATTAATCTACCTGTCTCGCAACCGGTTGGCTCAGGATAGAGCGTGGCTCGAGATGAAGGGCCCGGGTTCGATTGGTCAAGGGCATGTACCTGGTGGGGGCACATCCAGTAGGAGATGTGCAGAGGCGCTGCATGATGTTTCTCTTCATGAT  
 NW00587105 : GAGAAATCTAAAAATTTTATTTAATTTTCGCAACCGGTTGGCTCAGGATAGAGCGTGGCTCGAGATGAAGGGCCCGGGTTCGATTGGTCAAGGGCATGTACCTGGTGGGGGCACATCCAGTAGGAGATGTGCAGAGGCGCTGCATGATGTTTCTCTTCATGAT  
 NW00587106 : AATAAATTTTAAATCTCAATTTCTTCGCAACCGGTTGGCTCAGGATAGAGCGTGGCTCGAGATGAAGGGCCCGGGTTCGATTGGTCAAGGGCATGTACCTGGTGGGGGCACATCCAGTAGGAGATGTGCAGAGGCGCTGCATGATGTTTCTCTTCATGAT  
 NW00587106 : TAGCTGACATTTAAAGCAATCTTCCTCGCAACCGGTTGGCTCAGGATAGAGCGTGGCTCGAGATGAAGGGCCCGGGTTCGATTGGTCAAGGGCATGTACCTGGTGGGGGCACATCCAGTAGGAGATGTGCAGAGGCGCTGCATGATGTTTCTCTTCATGAT  
 NW00587105 : GAAACACAGACATAAAGAAAGAAATTCGCAACCGGTTGGCTCAGGATAGAGCGTGGCTCGAGATGAAGGGCCCGGGTTCGATTGGTCAAGGGCATGTACCTGGTGGGGGCACATCCAGTAGGAGATGTGCAGAGGCGCTGCATGATGTTTCTCTTCATGAT  
 NW00587111 : GTTTATTAGTTTAAAGAACCAAGTATTCGCAACCGGTTGGCTCAGGATAGAGCGTGGCTCGAGATGAAGGGCCCGGGTTCGATTGGTCAAGGGCATGTACCTGGTGGGGGCACATCCAGTAGGAGATGTGCAGAGGCGCTGCATGATGTTTCTCTTCATGAT  
 NW00587106 : CAATATACATTTAACTCAATTAATTTGTCGCAACCGGTTGGCTCAGGATAGAGCGTGGCTCGAGATGAAGGGCCCGGGTTCGATTGGTCAAGGGCATGTACCTGGTGGGGGCACATCCAGTAGGAGATGTGCAGAGGCGCTGCATGATGTTTCTCTTCATGAT  
 NW00587107 : ATGTGCTCAATTTAAATCTGAATATTCGCAACCGGTTGGCTCAGGATAGAGCGTGGCTCGAGATGAAGGGCCCGGGTTCGATTGGTCAAGGGCATGTACCTGGTGGGGGCACATCCAGTAGGAGATGTGCAGAGGCGCTGCATGATGTTTCTCTTCATGAT  
 NW00587235 : TATTGATGTATATATATTAATCAATTTTCGCAACCGGTTGGCTCAGGATAGAGCGTGGCTCGAGATGAAGGGCCCGGGTTCGATTGGTCAAGGGCATGTACCTGGTGGGGGCACATCCAGTAGGAGATGTGCAGAGGCGCTGCATGATGTTTCTCTTCATGAT  
 NW00588029 : TATTTATATATGTATATATAAATTTGTCGCAACCGGTTGGCTCAGGATAGAGCGTGGCTCGAGATGAAGGGCCCGGGTTCGATTGGTCAAGGGCATGTACCTGGTGGGGGCACATCCAGTAGGAGATGTGCAGAGGCGCTGCATGATGTTTCTCTTCATGAT  
 NW00587104 : GAATAAACATTAAGAAACAATCTTCGCAACCGGTTGGCTCAGGATAGAGCGTGGCTCGAGATGAAGGGCCCGGGTTCGATTGGTCAAGGGCATGTACCTGGTGGGGGCACATCCAGTAGGAGATGTGCAGAGGCGCTGCATGATGTTTCTCTTCATGAT  
 NW00587138 : TGTGAGATAAAGCAAGAAAGGGTCTTCGCAACCGGTTGGCTCAGGATAGAGCGTGGCTCGAGATGAAGGGCCCGGGTTCGATTGGTCAAGGGCATGTACCTGGTGGGGGCACATCCAGTAGGAGATGTGCAGAGGCGCTGCATGATGTTTCTCTTCATGAT  
 NW00587107 : AAAAAATATTTTAAAAAGATCACTTCGCAACCGGTTGGCTCAGGATAGAGCGTGGCTCGAGATGAAGGGCCCGGGTTCGATTGGTCAAGGGCATGTACCTGGTGGGGGCACATCCAGTAGGAGATGTGCAGAGGCGCTGCATGATGTTTCTCTTCATGAT  
 NW00587108 : CTTCCTCTCTTAAAAAATACCTCTTCGCAACCGGTTGGCTCAGGATAGAGCGTGGCTCGAGATGAAGGGCCCGGGTTCGATTGGTCAAGGGCATGTACCTGGTGGGGGCACATCCAGTAGGAGATGTGCAGAGGCGCTGCATGATGTTTCTCTTCATGAT  
 NW00587151 : CTTCCTCTCTTAAAAAATACCTTTCACTTCGCAACCGGTTGGCTCAGGATAGAGCGTGGCTCGAGATGAAGGGCCCGGGTTCGATTGGTCAAGGGCATGTACCTGGTGGGGGCACATCCAGTAGGAGATGTGCAGAGGCGCTGCATGATGTTTCTCTTCATGAT  
 NW00587110 : AATAGCAATTTAAAAATTTTCTCTCTTCGCAACCGGTTGGCTCAGGATAGAGCGTGGCTCGAGATGAAGGGCCCGGGTTCGATTGGTCAAGGGCATGTACCTGGTGGGGGCACATCCAGTAGGAGATGTGCAGAGGCGCTGCATGATGTTTCTCTTCATGAT  
 NW00587112 : AAAAATAGCAATTAATCAATTAATTCAGCAACCGGTTGGCTCAGGATAGAGCGTGGCTCGAGATGAAGGGCCCGGGTTCGATTGGTCAAGGGCATGTACCTGGTGGGGGCACATCCAGTAGGAGATGTGCAGAGGCGCTGCATGATGTTTCTCTTCATGAT  
 NW00587168 : ATATGTACATTAATAACTCCTACATGTTCGCAACCG

[illegible]

[illegible]

[illegible]
