# Supplementary material for: Analysis of SINE Families B2, Dip, and Ves with Special Reference to Polyadenylation Signals and Transcription Terminators
Source: MDPI journal article supplement (doi:10.3390/ijms22189897), 2021-09-13
Supplement: s1 [file s1]

PVKW010000232.1  
PVKW010000029.1  
PVKW010007572.1  
PVKW010012865.1  
PVKW010391374.1  
PVKW01004268.1  
PVKW010005974.1  
PVKW010166869.1  
PVKW010136149.1  
PVKW010047025.1  
PVKW010024963.1  
PVKW010062383.1  
PVKW010101163  
PVKW010000753  
PVKW010001046  
PVKW010067368.1  
PVKW01011336.1  
PVKW010005627.1  
PVKW010004993.1  
PVKW010000246.1  
PVKW010006328.1  
PVKW010112535.1  
PVKW010134666.1  
PVKW010033776.1  
PVKW010050130.1  
PVKW010002497.1  
PVKW010145510.1  
PVKW010203109.1  
PVKW010002079.1  
PVKW010002059.1  
PVKW010013620.1  
PVKW010068910.1  
PVKW010015763.1  
PVKW010101536.1  
PVKW010149234.1  
PVKW010001911.1  
PVKW010067655.1  
PVKW010088921.1  
PVKW010198829.1  
PVKW010024894.1  
PVKW010067861.1  
PVKW010012478.1  
PVKW010001726.1  
PVKW010001449.1  
PVKW010003485.1  
PVKW010005006.1  
PVKW010043933.1  
PVKW010040692.1  
PVKW010002946.1  
PVKW010022497.1  
PVKW010014085.1  
PVKW010041458.1  
PVKW010047843.1  
PVKW010109024.1  
PVKW010012339.1  
PVKW010004996.1  
PVKW010062488.1  
PVKW010046796.1  
PVKW010011365.1  
PVKW010006850.1  
PVKW010009979.1  
PVKW010019386.1  
PVKW010050442.1  
PVKW010018656.1  
PVKW010019198.1  
PVKW010039191.1  
PVKW010084254.1  
PVKW010020145.1  
PVKW010059942.1  
PVKW010159600.1  
PVKW010000100.1  
PVKW010072700.1  
PVKW010000146.1

[illegible]

[illegible]

|                                    | Copy number | Proportion |
|------------------------------------|-------------|------------|
| T <sup>+</sup> copies              | 22          | 30 %       |
| Conventional T <sup>+</sup> copies | 6           | 8%         |
| T <sup>-</sup> copies              | 45          | 62%        |
| Total                              | 73          |            |

**Figure S11.** Random Dip\_b2 copies from the *A. bullata* genome. Nucleotide sequences are highlighted as follows: PASS, strong pol III terminators, medium terminators, rudimentary terminators, and oligo(A). Conventional T<sup>+</sup> copies do not contain either a terminator or an oligo(A).
