# Supplementary material for: Analysis of SINE Families B2, Dip, and Ves with Special Reference to Polyadenylation Signals and Transcription Terminators
Source: MDPI journal article supplement (doi:10.3390/ijms22189897), 2021-09-13
Supplement: s1 [file s1]

Vecs

NW005871649.1 243816-244231 : AAAAGGTGCTCTTATATGTCGAATTTCTGCCGCGCGCGCTGCTGCTCAGTGGTGACCTCTGACCTATGACCAAGAGGTGACGGTTTCGATTCCCGCTCAGGGCATTGCCAGGTTGAGGCTCCATCCCCAGTAAGGGGCGTGCAGGAGGCACCC

NW005871868.1 4796-5216 : TTCATATTCAATTTTGGGGACCTTTGCCGCGCGCGCTGCTGCTCAGTGGTGACCTCTGACCTATGACCAAGAGGTGACGGTTTCGATTCCCGCTCAGGGCATTGCCAGGTTGAGGCTCCATCCCCAGTAAGGGGCGTGCAGGAGGCACCC

NW005871939.1 21207-21268 : AAGCTGTGAGCAAGAGCTGATCATCGCCCGCGCGCGCTGCTGCTCAGTGGTGACCTCTGACCTATGACCAAGAGGTGACGGTTTCGATTCCCGCTCAGGGCATTGCCAGGTTGAGGCTCCATCCCCAGTAAGGGGCGTGCAGGAGGCACCC

NW005872283.1 84477-84886 : GCATCTCGGTGCTTTAGATACCTGACGGCGCGCGCGCTGCTGCTCAGTGGTGACCTCTGACCTATGACCAAGAGGTGACGGTTTCGATTCCCGCTCAGGGCATTGCCAGGTTGAGGCTCCATCCCCAGTAAGGGGCGTGCAGGAGGCACCC

NW005871124.1 2324569-2324972 : GTGTGCCAATTAACGTTGCCCTAAAACGCCGCGCGCGCTGCTGCTCAGTGGTGACCTCTGACCTATGACCAAGAGGTGACGGTTTCGATTCCCGCTCAGGGCATTGCCAGGTTGAGGCTCCATCCCCAGTAAGGGGCGTGCAGGAGGCACCC

NW005872298.1 154206-154628 : AGAACCAATGATTTGTAAGAAAAATAGCCGCGCGCGCTGCTGCTCAGTGGTGACCTCTGACCTATGACCAAGAGGTGACGGTTTCGATTCCCGCTCAGGGCATTGCCAGGTTGAGGCTCCATCCCCAGTAAGGGGCGTGCAGGAGGCACCC

NW005871082.1 8797663-8798084 : ACAAAAGGGGCATCGAAAGTAGTCTCAGCCGCGCGCGCTGCTGCTCAGTGGTGACCTCTGACCTATGACCAAGAGGTGACGGTTTCGATTCCCGCTCAGGGCATTGCCAGGTTGAGGCTCCATCCCCAGTAAGGGGCGTGCAGGAGGCACCC

NW005871197.1 820729-821151 : NNNNNNNNNNNNNNNNNNNNNNNATTCGCCGCGCGCGCTGCTGCTCAGTGGTGACCTCTGACCTATGACCAAGAGGTGACGGTTTCGATTCCCGCTCAGGGCATTGCCAGGTTGAGGCTCCATCCCCAGTAAGGGGCGTGCAGGAGGCACCC

NW005871558.1 161777-162199 : AAAAGTGGCGCTTTGTAAGTGGGGCGCCGCGCGCGCTGCTGCTCAGTGGTGACCTCTGACCTATGACCAAGAGGTGACGGTTTCGATTCCCGCTCAGGGCATTGCCAGGTTGAGGCTCCATCCCCAGTAAGGGGCGTGCAGGAGGCACCC

NW005871270.1 1325999-1326420 : CAAAGAAAGAAATAAAAGGCACTTACGCCGCGCGCGCTGCTGCTCAGTGGTGACCTCTGACCTATGACCAAGAGGTGACGGTTTCGATTCCCGCTCAGGGCATTGCCAGGTTGAGGCTCCATCCCCAGTAAGGGGCGTGCAGGAGGCACCC

NW005871205.1 42007-42429 : CCTCAGGCTCTTAAGAGGCTTTTATGTCGCCGCGCGCGCTGCTGCTCAGTGGTGACCTCTGACCTATGACCAAGAGGTGACGGTTTCGATTCCCGCTCAGGGCATTGCCAGGTTGAGGCTCCATCCCCAGTAAGGGGCGTGCAGGAGGCACCC

NW005871071.1 8334330-8334751 : AGTGTGCTTTAAATTTGTTTCAAGTCCGCCGCGCGCGCTGCTGCTCAGTGGTGACCTCTGACCTATGACCAAGAGGTGACGGTTTCGATTCCCGCTCAGGGCATTGCCAGGTTGAGGCTCCATCCCCAGTAAGGGGCGTGCAGGAGGCACCC

NW005872280.1 42794-43216 : GTTTTATTGTAATTAATAATATGACGCCGCGCGCGCTGCTGCTCAGTGGTGACCTCTGACCTATGACCAAGAGGTGACGGTTTCGATTCCCGCTCAGGGCATTGCCAGGTTGAGGCTCCATCCCCAGTAAGGGGCGTGCAGGAGGCACCC

NW005871051.1 12123379-1212380 : AAAGGTATTTTAAAAATAGTTTTGTAGCCGCCGCGCGCTGCTGCTCAGTGGTGACCTCTGACCTATGACCAAGAGGTGACGGTTTCGATTCCCGCTCAGGGCATTGCCAGGTTGAGGCTCCATCCCCAGTAAGGGGCGTGCAGGAGGCACCC

NW005871114.1 1519274-1519698 : ATGTTGTAGCTTAAAGGCAAGTGGCAAGCCGCGCGCGCTGCTGCTCAGTGGTGACCTCTGACCTATGACCAAGAGGTGACGGTTTCGATTCCCGCTCAGGGCATTGCCAGGTTGAGGCTCCATCCCCAGTAAGGGGCGTGCAGGAGGCACCC

NW005871085.1 8825394-8825807 : AATTAGTTTTATCATTTGTAATTTTTCGCCGCGCGCGCTGCTGCTCAGTGGTGACCTCTGACCTATGACCAAGAGGTGACGGTTTCGATTCCCGCTCAGGGCATTGCCAGGTTGAGGCTCCATCCCCAGTAAGGGGCGTGCAGGAGGCACCC

NW005871048.1 14046359-1404678 : GAGGGCTGGATCAAAATGTCATGCTTTCGCCGCGCGCGCTGCTGCTCAGTGGTGACCTCTGACCTATGACCAAGAGGTGACGGTTTCGATTCCCGCTCAGGGCATTGCCAGGTTGAGGCTCCATCCCCAGTAAGGGGCGTGCAGGAGGCACCC

NW005871486.1 214707-215129 : CATGGGTATAAATATATAGTTGCTGCCGCCGCGCGCTGCTGCTCAGTGGTGACCTCTGACCTATGACCAAGAGGTGACGGTTTCGATTCCCGCTCAGGGCATTGCCAGGTTGAGGCTCCATCCCCAGTAAGGGGCGTGCAGGAGGCACCC

NW005871141.1 285126-285545 : TACCCCACTAAATCTTCTGCTCTTGCCGCGCGCGCTGCTGCTCAGTGGTGACCTCTGACCTATGACCAAGAGGTGACGGTTTCGATTCCCGCTCAGGGCATTGCCAGGTTGAGGCTCCATCCCCAGTAAGGGGCGTGCAGGAGGCACCC

NW005871161.1 4597735-4598153 : CCAACCATAAATTTTTCCTTGCTTGCCGCCGCGCGCGCTGCTGCTCAGTGGTGACCTCTGACCTATGACCAAGAGGTGACGGTTTCGATTCCCGCTCAGGGCATTGCCAGGTTGAGGCTCCATCCCCAGTAAGGGGCGTGCAGGAGGCACCC

NW005871067.1 3163046-3163468 : AATATGTTTAAAGTCTCAAGCAAAAGCCGCCGCGCGCTGCTGCTCAGTGGTGACCTCTGACCTATGACCAAGAGGTGACGGTTTCGATTCCCGCTCAGGGCATTGCCAGGTTGAGGCTCCATCCCCAGTAAGGGGCGTGCAGGAGGCACCC

NW005871086.1 3582561-3582981 : ACATTTTCATTTTAAAAAGTTAAACTTTCGCCGCGCGCGCTGCTGCTCAGTGGTGACCTCTGACCTATGACCAAGAGGTGACGGTTTCGATTCCCGCTCAGGGCATTGCCAGGTTGAGGCTCCATCCCCAGTAAGGGGCGTGCAGGAGGCACCC

NW005871329.1 399265-399687 : CATGTTGACGCTGTGTTAATATCTTTCGCCGCGCGCGCTGCTGCTCAGTGGTGACCTCTGACCTATGACCAAGAGGTGACGGTTTCGATTCCCGCTCAGGGCATTGCCAGGTTGAGGCTCCATCCCCAGTAAGGGGCGTGCAGGAGGCACCC

NW005871107.1 2868300-2867255 : TTAATGGCCATCAAAATGTATGCTTTCGCCGCGCGCGCTGCTGCTCAGTGGTGACCTCTGACCTATGACCAAGAGGTGACGGTTTCGATTCCCGCTCAGGGCATTGCCAGGTTGAGGCTCCATCCCCAGTAAGGGGCGTGCAGGAGGCACCC

NW005871200.1 2427652-2428071 : GAGAAGATAAAGAGTTCGTAATCTGCCGCCGCGCGCGCTGCTGCTCAGTGGTGACCTCTGACCTATGACCAAGAGGTGACGGTTTCGATTCCCGCTCAGGGCATTGCCAGGTTGAGGCTCCATCCCCAGTAAGGGGCGTGCAGGAGGCACCC

NW005871169.1 1149881-1150303 : CTTTCAGATTAATATAGCATGCCAAGCCGCCGCGCGCTGCTGCTCAGTGGTGACCTCTGACCTATGACCAAGAGGTGACGGTTTCGATTCCCGCTCAGGGCATTGCCAGGTTGAGGCTCCATCCCCAGTAAGGGGCGTGCAGGAGGCACCC

NW005871067.1 5341238-5341657 : GTTGACCTCAAGATTTTAAAAATCAAGCCGCCGCGCGCTGCTGCTCAGTGGTGACCTCTGACCTATGACCAAGAGGTGACGGTTTCGATTCCCGCTCAGGGCATTGCCAGGTTGAGGCTCCATCCCCAGTAAGGGGCGTGCAGGAGGCACCC

NW005880354.1 4369-4792 : CATCCCAAGTAAAGCTGTTTGTGTCAGCCGCCGCGCGCTGCTGCTCAGTGGTGACCTCTGACCTATGACCAAGAGGTGACGGTTTCGATTCCCGCTCAGGGCATTGCCAGGTTGAGGCTCCATCCCCAGTAAGGGGCGTGCAGGAGGCACCC

NW005871107.1 4795163-4795597 : CAAAAAAGATTTTAAAAATATAATAAAGCCGCCGCGCGCTGCTGCTCAGTGGTGACCTCTGACCTATGACCAAGAGGTGACGGTTTCGATTCCCGCTCAGGGCATTGCCAGGTTGAGGCTCCATCCCCAGTAAGGGGCGTGCAGGAGGCACCC

NW005871048.1 31963432-3196385 : TTACCATGCCAAGTCTGATCTCTTATCTGCCGCGCGCGCTGCTGCTCAGTGGTGACCTCTGACCTATGACCAAGAGGTGACGGTTTCGATTCCCGCTCAGGGCATTGCCAGGTTGAGGCTCCATCCCCAGTAAGGGGCGTGCAGGAGGCACCC

NW005871636.1 156560-156973 : TACTACGCCATCAAAATGAATCTTTCGCCGCCGCGCGCTGCTGCTCAGTGGTGACCTCTGACCTATGACCAAGAGGTGACGGTTTCGATTCCCGCTCAGGGCATTGCCAGGTTGAGGCTCCATCCCCAGTAAGGGGCGTGCAGGAGGCACCC

NW005871228.1 2721458-2721881 : GGGACATTTTAAAGGACATTAATAAGCCGCCGCGCGCTGCTGCTCAGTGGTGACCTCTGACCTATGACCAAGAGGTGACGGTTTCGATTCCCGCTCAGGGCATTGCCAGGTTGAGGCTCCATCCCCAGTAAGGGGCGTGCAGGAGGCACCC

NW005871051.1 11353621-1135404 : GTCAGAATTTTCTGAAATGTTTGTGCCGCCGCGCGCGCTGCTGCTCAGTGGTGACCTCTGACCTATGACCAAGAGGTGACGGTTTCGATTCCCGCTCAGGGCATTGCCAGGTTGAGGCTCCATCCCCAGTAAGGGGCGTGCAGGAGGCACCC

NW005871214.1 2312776-2313194 : ATCTCAAAATTAAGATTTTAAAAAGCCGCCGCGCGCTGCTGCTCAGTGGTGACCTCTGACCTATGACCAAGAGGTGACGGTTTCGATTCCCGCTCAGGGCATTGCCAGGTTGAGGCTCCATCCCCAGTAAGGGGCGTGCAGGAGGCACCC

NW005872601.1 31900-32322 : ATAAATCAATTCAGATAAACAATCTGCCGCCGCGCGCTGCTGCTCAGTGGTGACCTCTGACCTATGACCAAGAGGTGACGGTTTCGATTCCCGCTCAGGGCATTGCCAGGTTGAGGCTCCATCCCCAGTAAGGGGCGTGCAGGAGGCACCC

NW005871271.1 1085664-1086083 : AAAGAAGATTAATTAATATAAGATCTGCCGCCGCGCGCTGCTGCTCAGTGGTGACCTCTGACCTATGACCAAGAGGTGAC
