# Supplementary material for: Analysis of SINE Families B2, Dip, and Ves with Special Reference to Polyadenylation Signals and Transcription Terminators
Source: MDPI journal article supplement (doi:10.3390/ijms22189897), 2021-09-13
Supplement: s1 [file s1]

**Table S2.** Random B2a copies in genomes of 3 to 10 mouse strains

| #  | Chromosome:<br>position   | Number<br>of<br>strains | Tail with a terminator          | terminator | A-rich<br>tail<br>length,<br>nt |
|----|---------------------------|-------------------------|---------------------------------|------------|---------------------------------|
| 1  | chr18:5350773-5350961     | 5                       | TCTTAAAAAAAAAAAA                | TCTT       | 12                              |
| 2  | chr18:76833638-76833828   | 7                       | TCTTTAAAAAAAAAAAAAAAAAAAA       | TCTTT      | 21                              |
| 3  | chr19:6290666-6290856     | 9                       | TCTTTAAAAAAAAAAAAAAAAAAAA       | TCTTT      | 23                              |
| 4  | chr19:24470737-24470926   | 4                       | TCTTTAAAAAAAAAAAA               | TCTTT      | 12                              |
| 5  | chr14:11964242-11964434   | 5                       | TCTTTAAAAAAAAAAAA               | TCTTT      | 15                              |
| 6  | chr14:32331245-32331425   | 10                      | TAAAAAAAAAAAA                   | T          | 14                              |
| 7  | chr1:59784199-59784390    | 9                       | TCTTTAAAAAAAAAAAA               | TCTTT      | 13                              |
| 8  | chr5:62439904-62440095    | 7                       | TCTTTAAAAAAAAAAAAAAAAAAAA       | TCTTT      | 25                              |
| 9  | chr11:116169755-116169946 | 9                       | TCTTTAAAAAAAAAAAAAAAAAAAA       | TCTTT      | 22                              |
| 10 | chr16:84882195-84882386   | 10                      | TCTAAAAAAAAAAAAAAAAAAAAAAAAAAAA | TCT        | 37                              |
| 11 | chr6:5841131-5841321      | 9                       | TCTTTAAACAAACAAACAAAC           | TCTTT      | 18                              |
| 12 | chr15:29283358-29283547   | 8                       | TCTTTAAAAAAAAAAAA               | TCTTT      | 12                              |
| 13 | chr15:75850595-75850787   | 10                      | TCTTTAAAAAAAAAAAA               | TCTTT      | 14                              |
| 14 | chr16:15583691-15583883   | 10                      | TCTTTAAAAAAAAAAAAAAAAAAAA       | TCTTT      | 24                              |
| 15 | chr13:63501760-63502051   | 4                       | TCTTTAAAAAAAAAAAA               | TCTTT      | 13                              |
| 16 | chr19:22807962-22808148   | 9                       | TCTTTAATAAAAAAAAA               | TCTTT      | 12                              |
| 17 | chr1:38072204-38072394    | 10                      | TCTTTAAAAAAAAAAAAAAAAAAAA       | TCTTT      | 34                              |
| 18 | chr2:30389863-30390054    | 6                       | TCTTTAAAAAAAAAAAAAAAAAAAA       | TCTTT      | 20                              |
| 19 | chr14:36064739-36064929   | 8                       | TCTTAAAAAAAAAAAAAAAAAAAA        | TCTT       | 19                              |
| 20 | chr4:147855313-147855504  | 7                       | TTAAAAAAAAAA                    | TT         | 10                              |
| 21 | chr1:191971975-191972166  | 10                      | TCTTTAAAAAAAAAAAA               | TCTTT      | 10                              |
| 22 | chr6:72675395-72675585    | 10                      | TCTTTAAAAAAAAAAAA               | TCTTT      | 11                              |
| 23 | chr5:106796937-106797129  | 4                       | TCTTAAAAAAAAAAAAAAAAAAAA        | TCTT       | 19                              |
| 24 | chr11:103834303-103834494 | 4                       | TCTTTAAAAAAAAAAAAAAAAAAAA       | TCTTT      | 25                              |
| 25 | chr6:47587296-47587488    | 4                       | TCTTTAAAAAAAAAAAAAAAAAAAA       | TCTTT      | 30                              |
| 26 | chr2:128296655-128296846  | 7                       | TCTTAAAAAAAAAAAAAAAAAAAA        | TCTT       | 18                              |
| 27 | chr11:93691668-93691858   | 9                       | TTTTTTTAAAAAAA                  | TTTTTT     | 8                               |
| 28 | chr14:14214287-14214478   | 8                       | TCTTAAAAAAAAAAAAAGAAAAAGAAAA    | TCTT       | 23                              |
| 29 | chr5:106796837-106797159  | 4                       | TCTTAAAAAAAAAAAAAAAAAAAA        | TCTT       | 19                              |
| 30 | chr5:106796937-106797129  | 10                      | TTTAAAAAAAAAAAA                 | TTT        | 16                              |
| 31 | chr6:72531340-72531534    | 5                       | TCTAAAAAAAAAAAA                 | TCT        | 16                              |
| 32 | chr4:137398263-137398455  | 4                       | TCTTTAAAAAAAAAAAA               | TCTTT      | 17                              |

|    |                           |    |                                |       |                    |
|----|---------------------------|----|--------------------------------|-------|--------------------|
| 33 | chr6:48683691-48683881    | 4  | TCTTTAAAAAAAAAAAA              | TCTTT | 12                 |
| 34 | chr2:71398736-71398924    | 8  | TCTTTAAAAAAAAAAAA              | TCTTT | 10                 |
| 35 | chr4:129475034-129475226  | 10 | TCTTTAAAAAAAAAAAAAAAAAGAAAGAAA | TCTTT | 27                 |
| 36 | chr12:55074054-55074243   | 4  | TCAAAAAAAAAAAAAAAAAAAAA        | TC    | 28                 |
| 37 | chr6:49065772-49065956    | 5  | TCTTTAAAAAAAAAAAA              | TCTTT | 10                 |
| 38 | chr6:49065772-49065956    | 10 | TCTTTAATAAAAAAAAAAAAAA (?)     | TCTTT | 20                 |
| 39 | chr9:72292349-72292551    | 8  | TCTTTAAAAAAAAAAAA              | TCTTT | 16                 |
| 40 | chr1:179682712-179682901  | 9  | TCTAAAAAAAAAAAAAAAAAAAA        | TCT   | 33                 |
| 41 | chr4:99537248-99537439    | 7  | TCTTTAAAAAAAAAAAA              | TCTTT | 13                 |
| 42 | chr3:73398294-73398486    | 10 | TCTTTAAAAAAAAAAAA              | TCTTT | 14                 |
| 43 | chr2:126998854-126999044  | 7  | TCTAAAAAAAAAAAA                | TCT   | 14                 |
| 44 | chr15:85054463-85054655   | 7  | TCTTTAAAAAAAAAAAAAAAAAAAA      | TCTTT | 29                 |
| 45 | chr12:110644921-110645112 | 5  | TCTTTAAAAAATAAAATAAAAA         | TCTTT | 19                 |
| 46 | chr11:120153752-120153943 | 7  | TCTATAAAAAAAAAAAAAAAAAAAAA     | TCT   | 38                 |
| 47 | chr18:14676022-14676213   | 9  | TCTTTAAAAAAAAAAAAATAAAAA       | TCTTT | 22                 |
| 48 | chr10:80045312-80045503   | 10 | TCTTTAAAAAAAAAAAAAAAAAAAA      | TCTTT | 27                 |
| 49 | chr19:32738436-32738628   | 4  | TCTTAAAAAAAAAAAAAAAAAAAA       | TCTT  | 22                 |
| 50 | chr14:56134393-56134588   | 6  | TCTTAAAAAAAAAAAAAAAAAAAA       | TCTT  | 19                 |
| 51 | chr10:127467358-127467550 | 4  | TCTTTAAAAAAAAAAAAAAAAAAAA      | TCTTT | 23                 |
| 52 | chr4:137760116-137760302  | 4  | TCTTTAAAAAAA                   | TCTTT | 8                  |
| 53 | chr1:46785922-46786114    | 3  | TCTTAAAAAAAAAAAAAAAAAAAA       | TCTT  | 39                 |
| 54 | chr2:153173361-153173550  | 10 | TCTTAAAAAAAAAAAAAAAAAAAA       | TCTT  | 38                 |
| 55 | chr1:166960683-166960876  | 10 | TCTTTAAAAAAAAAAAA              | TCTTT | 14                 |
| 56 | chr1:166960553-166960906  | 10 | TCTTTAAAAAAAAAAAA              | TCTTT | 14                 |
| 57 | chrX:74357261-74357579    | 9  | TTAAAAAAAAAAAA                 | TT    | 16                 |
| 58 | chr2:153173361-153173550  | 10 | TCTTAAAAAAAAAAAAAAAAAAAA       | TCTT  | 38                 |
| 59 | chr7:99431627-99431856    | 9  | TTTAAAAAAAAAAAA                | TTT   | 26                 |
|    |                           |    |                                |       | Mean length = 19.9 |

#### Terminator statistics

| Sequences | Number | Fraction |
|-----------|--------|----------|
| T>3       | 1      | 1.7%     |
| TCTTT     | 36     | 61.0%    |
| TCTT      | 11     | 18.6%    |
| Others    | 11     | 18.6%    |
