# Supplementary material for: Analysis of SINE Families B2, Dip, and Ves with Special Reference to Polyadenylation Signals and Transcription Terminators
Source: MDPI journal article supplement (doi:10.3390/ijms22189897), 2021-09-13
Supplement: s1 [file s1]

[illegible]

|               |                    |                                                                                                                         |                                     |
|---------------|--------------------|-------------------------------------------------------------------------------------------------------------------------|-------------------------------------|
| NW005871056.1 | 12907118-1290781   | GCCTTACACGGTTTGGCTCAGTGGATAGAGGCTGCGCCCTCGGAGCTCAAAGGTCCCGGTTTCGATTCCGGGTCAAGGGCATGTACCTGGTTGCGGGGACATCCCCAGTGGAGAGTGTG | CAGGAGGACAGCTGATGATGTTTCTCTCTCATGAT |
| NW005871102.1 | 5204275-5204975    | GCCCAACACGGTTTGGCTCAGTGGATAGAGGCTGCGCCCTCGGAGCTCAAAGGTCCCGGTTTCGATTCCGGGTCAAGGGCATGTACCTGGTTGCGGGGACATCCCCAGTGGAGAGTGTG | CAGGAGGACAGCTGATGATGTTTCTCTCTCATGAT |
| NW005871071.1 | 9278225-9278925    | GCCCAACACGGTTTGGCTCAGTGGATAGAGGCTGCGCCCTCGGAGCTCAAAGGTCCCGGTTTCGATTCCGGGTCAAGGGCATGTACCTGGTTGCGGGGACATCCCCAGTGGAGAGTGTG | CAGGAGGACAGCTGATGATGTTTCTCTCTCATGAT |
| NW005871452.1 | 13697-14397(+)     | GCCCAACACGGTTTGGCTCAGTGGATAGAGGCTGCGCCCTCGGAGCTCAAAGGTCCCGGTTTCGATTCCGGGTCAAGGGCATGTACCTGGTTGCGGGGACATCCCCAGTGGAGAGTGTG | CAGGAGGACAGCTGATGATGTTTCTCTCTCATGAT |
| NW005871893.1 | 98961-99661(+)     | GCCCAACACGGTTTGGCTCAGTGGATAGAGGCTGCGCCCTCGGAGCTCAAAGGTCCCGGTTTCGATTCCGGGTCAAGGGCATGTACCTGGTTGCGGGGACATCCCCAGTGGAGAGTGTG | CAGGAGGACAGCTGATGATGTTTCTCTCTCATGAT |
| NW005871076.1 | 1106601-1107301    | GCCCAACACGGTTTGGCTCAGTGGATAGAGGCTGCGCCCTCGGAGCTCAAAGGTCCCGGTTTCGATTCCGGGTCAAGGGCATGTACCTGGTTGCGGGGACATCCCCAGTGGAGAGTGTG | CAGGAGGACAGCTGATGATGTTTCTCTCTCATGAT |
| NW005871058.1 | 5721762-5722462    | GCCCAACACGGTTTGGCTCAGTGGATAGAGGCTGCGCCCTCGGAGCTCAAAGGTCCCGGTTTCGATTCCGGGTCAAGGGCATGTACCTGGTTGCGGGGACATCCCCAGTGGAGAGTGTG | CAGGAGGACAGCTGATGATGTTTCTCTCTCATGAT |
| NW005871548.1 | 309324-310024(+)   | GCCCAACACGGTTTGGCTCAGTGGATAGAGGCTGCGCCCTCGGAGCTCAAAGGTCCCGGTTTCGATTCCGGGTCAAGGGCATGTACCTGGTTGCGGGGACATCCCCAGTGGAGAGTGTG | CAGGAGGACAGCTGATGATGTTTCTCTCTCATGAT |
| NW005871074.1 | 191619-1916819     | GCCCAACACGGTTTGGCTCAGTGGATAGAGGCTGCGCCCTCGGAGCTCAAAGGTCCCGGTTTCGATTCCGGGTCAAGGGCATGTACCTGGTTGCGGGGACATCCCCAGTGGAGAGTGTG | CAGGAGGACAGCTGATGATGTTTCTCTCTCATGAT |
| NW005871257.1 | 1814908-1815608    | GCCCAACACGGTTTGGCTCAGTGGATAGAGGCTGCGCCCTCGGAGCTCAAAGGTCCCGGTTTCGATTCCGGGTCAAGGGCATGTACCTGGTTGCGGGGACATCCCCAGTGGAGAGTGTG | CAGGAGGACAGCTGATGATGTTTCTCTCTCATGAT |
| NW005871204.1 | 792871-793571(+)   | GCCCAACACGGTTTGGCTCAGTGGATAGAGGCTGCGCCCTCGGAGCTCAAAGGTCCCGGTTTCGATTCCGGGTCAAGGGCATGTACCTGGTTGCGGGGACATCCCCAGTGGAGAGTGTG | CAGGAGGACAGCTGATGATGTTTCTCTCTCATGAT |
| NW005871234.1 | 1560261-1560961(+) | GCCCAACACGGTTTGGCTCAGTGGATAGAGGCTGCGCCCTCGGAGCTCAAAGGTCCCGGTTTCGATTCCGGGTCAAGGGCATGTACCTGGTTGCGGGGACATCCCCAGTGGAGAGTGTG | CAGGAGGACAGCTGATGATGTTTCTCTCTCATGAT |
| NW005871108.1 | 3791526-3792266    | GCCCAACACGGTTTGGCTCAGTGGATAGAGGCTGCGCCCTCGGAGCTCAAAGGTCCCGGTTTCGATTCCGGGTCAAGGGCATGTACCTGGTTGCGGGGACATCCCCAGTGGAGAGTGTG | CAGGAGGACAGCTGATGATGTTTCTCTCTCATGAT |
| NW005871070.1 | 4853039-4853739    | GCCCAACACGGTTTGGCTCAGTGGATAGAGGCTGCGCCCTCGGAGCTCAAAGGTCCCGGTTTCGATTCCGGGTCAAGGGCATGTACCTGGTTGCGGGGACATCCCCAGTGGAGAGTGTG | CAGGAGGACAGCTGATGATGTTTCTCTCTCATGAT |
| NW005871070.1 | 7719605-7720305    | GCCCAACACGGTTTGGCTCAGTGGATAGAGGCTGCGCCCTCGGAGCTCAAAGGTCCCGGTTTCGATTCCGGGTCAAGGGCATGTACCTGGTTGCGGGGACATCCCCAGTGGAGAGTGTG | CAGGAGGACAGCTGATGATGTTTCTCTCTCATGAT |
| NW005871077.1 | 1447538-1448328    | GCCCAACACGGTTTGGCTCAGTGGATAGAGGCTGCGCCCTCGGAGCTCAAAGGTCCCGGTTTCGATTCCGGGTCAAGGGCATGTACCTGGTTGCGGGGACATCCCCAGTGGAGAGTGTG | CAGGAGGACAGCTGATGATGTTTCTCTCTCATGAT |
| NW005872385.1 | 65570-66270(+)     | GCCCAACACGGTTTGGCTCAGTGGATAGAGGCTGCGCCCTCGGAGCTCAAAGGTCCCGGTTTCGATTCCGGGTCAAGGGCATGTACCTGGTTGCGGGGACATCCCCAGTGGAGAGTGTG | CAGGAGGACAGCTGATGATGTTTCTCTCTCATGAT |
| NW005871093.1 | 595956-596296(-)   | GCCCAACACGGTTTGGCTCAGTGGATAGAGGCTGCGCCCTCGGAGCTCAAAGGTCCCGGTTTCGATTCCGGGTCAAGGGCATGTACCTGGTTGCGGGGACATCCCCAGTGGAGAGTGTG | CAGGAGGACAGCTGATGATGTTTCTCTCTCATGAT |
| NW005871050.1 | 30269072-3026977   | GCCCAACACGGTTTGGCTCAGTGGATAGAGGCTGCGCCCTCGGAGCTCAAAGGTCCCGGTTTCGATTCCGGGTCAAGGGCATGTACCTGGTTGCGGGGACATCCCCAGTGGAGAGTGTG | CAGGAGGACAGCTGATGATGTTTCTCTCTCATGAT |
| NW005871082.1 | 4787073-4787733    | GCCCAACACGGTTTGGCTCAGTGGATAGAGGCTGCGCCCTCGGAGCTCAAAGGTCCCGGTTTCGATTCCGGGTCAAGGGCATGTACCTGGTTGCGGGGACATCCCCAGTGGAGAGTGTG | CAGGAGGACAGCTGATGATGTTTCTCTCTCATGAT |
| NW005871057.1 | 4766626-4767326(+) | GCCCTGGCGGGTTTGGCTCAGTGGATAGAGGCTGCGCCCTCGGAGCTCAAAGGTCCCGGTTTCGATTCCGGGTCAAGGGCATGTACCTGGTTGCGGGGACATCCCCAGTGGAGAGTGTG | CAGGAGGACAGCTGATGATGTTTCTCTCTCATGAT |
| NW005871288.1 | 1804237-1804937    | GCCCTACACGGTTTGGCTCAGTGGATAGAGGCTGCGCCCTCGGAGCTCAAAGGTCCCGGTTTCGATTCCGGGTCAAGGGCATGTACCTGGTTGCGGGGACATCCCCAGTGGAGAGTGTG | CAGGAGGACAGCTGATGATGTTTCTCTCTCATGAT |
| NW005871276.1 | 1905630-1906330    | GCCCTACACGGTTTGGCTCAGTGGATAGAGGCTGCGCCCTCGGAGCTCAAAGGTCCCGGTTTCGATTCCGGGTCAAGGGCATGTACCTGGTTGCGGGGACATCCCCAGTGGAGAGTGTG | CAGGAGGACAGCTGATGATGTTTCTCTCTCATGAT |
| NW005872525.1 | 7147-7847(+)       | GCCCTACACGGTTTGGCTCAGTGGATAGAGGCTGCGCCCTCGGAGCTCAAAGGTCCCGGTTTCGATTCCGGGTCAAGGGCATGTACCTGGTTGCGGGGACATCCCCAGTGGAGAGTGTG | CAGGAGGACAGCTGATGATGTTTCTCTCTCATGAT |
| NW005871276.1 | 1968743-1969433    | GCCCTACACGGTTTGGCTCAGTGGATAGAGGCTGCGCCCTCGGAGCTCAAAGGTCCCGGTTTCGATTCCGGGTCAAGGGCATGTACCTGGTTGCGGGGACATCCCCAGTGGAGAGTGTG | CAGGAGGACAGCTGATGATGTTTCTCTCTCATGAT |
| NW005871461.1 | 176461-177341(+)   | GCCCTACACGGTTTGGCTCAGTGGATAGAGGCTGCGCCCTCGGAGCTCAAAGGTCCCGGTTTCGATTCCGGGTCAAGGGCATGTACCTGGTTGCGGGGACATCCCCAGTGGAGAGTGTG | CAGGAGGACAGCTGATGATGTTTCTCTCTCATGAT |
| NW005871054.1 | 18102271-1810297   | GCCCTACACGGTTTGGCTCAGTGGATAGAGGCTGCGCCCTCGGAGCTCAAAGGTCCCGGTTTCGATTCCGGGTCAAGGGCATGTACCTGGTTGCGGGGACATCCCCAGTGGAGAGTGTG | CAGGAGGACAGCTGATGATGTTTCTCTCTCATGAT |
| NW005871065.1 | 1822278-1822978    | GCCCTACACGGTTTGGCTCAGTGGATAGAGGCTGCGCCCTCGGAGCTCAAAGGTCCCGGTTTCGATTCCGGGTCAAGGGCATGTACCTGGTTGCGGGGACATCCCCAGTGGAGAGTGTG | CAGGAGGACAGCTGATGATGTTTCTCTCTCATGAT |
| NW005871052.1 | 13042168-1304286   | GCCCTACACGGTTTGGCTCAGTGGATAGAGGCTGCGCCCTCGGAGCTCAAAGGTCCCGGTTTCGATTCCGGGTCAAGGGCATGTACCTGGTTGCGGGGACATCCCCAGTGGAGAGTGTG | CAGGAGGACAGCTGATGATGTTTCTCTCTCATGAT |
| NW005871087.1 | 585958-5860258     | GCCCAACACGGTTTGGCTCAGTGGATAGAGGCTGCGCCCTCGGAGCTCAAAGGTCCCGGTTTCGATTCCGGGTCAAGGGCATGTACCTGGTTGCGGGGACATCCCCAGTGGAGAGTGTG | CAGGAGGACAGCTGATGATGTTTCTCTCTCATGAT |
| NW005872233.1 | 40944-41644(+)     | GCCCTACACGGTTTGGCTCAGTGGATAGAGGCTGCGCCCTCGGAGCTCAAAGGTCCCGGTTTCGATTCCGGGTCAAGGGCATGTACCT                                |                                     |



NW00581270.1 73331-74031(+) : GTTTCGACTCTC-TATCCG-TCTCCCTCTCCCTCTCTGTAATAAATCATAAATATATATTAAAAAATAAAATAAAATACAATTTAAAAAAGATTAACTATAAATAGGAAAA  
NW00581049.1 2904130-2904830( : GTTTCGACTCTC-TATCCG-TCTCCCTCTCCCTCTCTGTAATAAATCATAAATATATATTAAAAAATAAAATAAAATATAAAATAAAATCTGTTCTAAATTATTGACT  
NW00581392.1 555915-556615(-) : GTTTCGACTCTC-TATCCG-TCTCCCTCTCCCTCTCTGTAATAAATCATAAATATATATTAAAAAATAAAATAAAATCCAGACTTCACAAAAAAGAGCTGATTA  
NW00581108.1 6189372-6183637( : GTTTCGACTCTC-TATCCG-TCTCCCTCTCCCTCTCTGTAATAAATCATAAATATATATTAAAAAATAAAATAAAATGAGCACTTGACACATAAAAAAATTTTAAAAACAAA  
NW00581109.1 7930732-7931432( : GTTTCGACTCTC-TATCCG-TCTCCCTCTCCCTCTCTGTAATAAATCATAAATATATATTAAAAAATAAAATAGCAATGGAAGTTTTAAAAAATAAAATATATTTGCTGTGTG  
NW005811096.1 5323928-5324628( : GTTTCGACTCTC-TATCCG-TCTCCCTCTCCCTCTCTGTAATAAATCATAAATATATATTAAAAAATAAAATAGGACACATCTTTGTATATCATTTCTCATCAAA  
NW0058173165.1 26042-26742(-) : GTTTCGACTCTC-TATCCG-TCTCCCTCTCCCTCTCTGTAATAAATCATAAATATATATTAAAAAATAAAATAAAATATAGTTTATTGATGTCAGAGAGAG----  
NW00581706.1 3653825-3654525( : GTTTCGACTCTC-TATCCG-TCTCCCTCTCCCTCTCTGTAATAAATCATAAATATATATTAAAAAATAAAATAAAATATGAAATTTATCTATCTTATCTTAT  
NW005812266.1 2136243-2136943( : GTTTCGACTCTC-TATCCG-TCTCCCTCTCCCTCTCTGTAATAAATCATAAATATATATTAAAAAATAAAATAAAATATGAAATTTATCTATCTTATCTTAT  
NW00581332.1 576441-577141(+) : GTTTCGACTCTC-TATCCG-TCTCCCTCTCCCTCTCTGTAATAAATCATAAATATATATTAAAAAATAAAATAAAATGAAATTTATCTATCTTATCTTAT  
NW00581456.1 556994-557394(-) : GTTTCGACTCTC-TATCCG-TCTCCCTCTCCCTCTCTGTAATAAATCATAAATATATATTAAAAAATAAAATAAAATGAAATTTATCTATCTTATCTTAT  
NW0058172286.1 44757-45457(+) : GTTTCGACTCTC-TATCCG-TCTCCCTCTCCCTCTCTGTAATAAATCATAAATATATATTAAAAAATAAAATAAAATGAAATTTATCTATCTTATCTTAT  
NW005817110.1 1352542-1353242( : GTTTCGACTCTC-TATCCG-TCTCCCTCTCCCTCTCTGTAATAAATCATAAATATATATTAAAAAATAAAATAAAATGAAATTTATCTATCTTATCTTAT  
NW005811063.1 13652753-1365345 : GTTTCGACTCTC-TATCCG-TCTCCCTCTCCCTCTCTGTAATAAATCATAAATATATATTAAAAAATAAAATAAAATGAAATTTATCTATCTTATCTTAT  
NW00581521.1 671473-672173(+) : GTTTCGACTCTC-TATCCG-TCTCCCTCTCCCTCTCTGTAATAAATCATAAATATATATTAAAAAATAAAATAAAATGAAATTTATCTATCTTATCTTAT  
NW00581144.1 4276463-4277163( : GTTTCGACTCTC-TATCCG-TCTCCCTCTCCCTCTCTGTAATAAATCATAAATATATATTAAAAAATAAAATAAAATGAAATTTATCTATCTTATCTTAT  
NW00581247.1 996913-997613(+) : GTTTCGACTCTC-TATCCG-TCTCCCTCTCCCTCTCTGTAATAAATCATAAATATATATTAAAAAATAAAATAAAATGAAATTTATCTATCTTATCTTAT  
NW00581199.1 1708457-1709157( : GTTTCGACTCTC-TATCCG-TCTCCCTCTCCCTCTCTGTAATAAATCATAAATATATATTAAAAAATAAAATAAAATGAAATTTATCTATCTTATCTTAT  
NW00581048.1 6325582-6326282( : GTTTCGACTCTC-TATCCG-TCTCCCTCTCCCTCTCTGTAATAAATCATAAATATATATTAAAAAATAAAATAAAATGAAATTTATCTATCTTATCTTAT  
NW005811056.1 14792022-1479272( : GTTTCGACTCTC-TATCCG-TCTCCCTCTCCCTCTCTGTAATAAATCATAAATATATATTAAAAAATAAAATAAAATGAAATTTATCTATCTTATCTTAT  
NW00581095.1 3616794-3617494( : GTTTCGACTCTC-TATCCG-TCTCCCTCTCCCTCTCTGTAATAAATCATAAATATATATTAAAAAATAAAATAAAATGAAATTTATCTATCTTATCTTAT  
NW005811157.1 2809083-2809783( : GTTTCGACTCTC-TATCCG-TCTCCCTCTCCCTCTCTGTAATAAATCATAAATATATATTAAAAAATAAAATAAAATGAAATTTATCTATCTTATCTTAT  
NW00581071.1 8906391-8907091( : GTTTCGACTCTC-TATCCG-TCTCCCTCTCCCTCTCTGTAATAAATCATAAATATATATTAAAAAATAAAATAAAATGAAATTTATCTATCTTATCTTAT  
NW00581267.1 1552089-1552789( : GTTTCGACTCTC-TATCCG-TCTCCCTCTCCCTCTCTGTAATAAATCATAAATATATATTAAAAAATAAAATAAAATGAAATTTATCTATCTTATCTTAT  
NW00581332.1 955434-956134(+) : GTTTCGACTCTC-TATCCG-TCTCCCTCTCCCTCTCTGTAATAAATCATAAATATATATTAAAAAATAAAATAAAATGAAATTTATCTATCTTATCTTAT  
NW005811056.1 12907118-1290781( : GTTTCGACTCTC-TATCCG-TCTCCCTCTCCCTCTCTGTAATAAATCATAAATATATATTAAAAAATAAAATAAAATGAAATTTATCTATCTTATCTTAT  
NW00581102.1 5204275-5204975( : GTTTCGACTCTC-TATCCG-TCTCCCTCTCCCTCTCTGTAATAAATCATAAATATATATTAAAAAATAAAATAAAATGAAATTTATCTATCTTATCTTAT  
NW00581071.1 9278225-9278925( : GTTTCGACTCTC-TATCCG-TCTCCCTCTCCCTCTCTGTAATAAATCATAAATATATATTAAAAAATAAAATAAAATGAAATTTATCTATCTTATCTTAT  
NW00581452.1 13697-14397(-) : GTTTCGACTCTC-TATCCG-TCTCCCTCTCCCTCTCTGTAATAAATCATAAATATATATTAAAAAATAAAATAAAATGAAATTTATCTATCTTATCTTAT  
NW00581893.1 98961-99661(+) : GTTTCGACTCTC-TATCCG-TCTCCCTCTCCCTCTCTGTAATAAATCATAAATATATATTAAAAAATAAAATAAAATGAAATTTATCTATCTTATCTTAT  
NW00581706.1 1106601-1107301( : GTTTCGACTCTC-TATCCG-TCTCCCTCTCCCTCTCTGTAATAAATCATAAATATATATTAAAAAATAAAATAAAATGAAATTTATCTATCTTATCTTAT  
NW00581508.1 5721762-5724262( : GTTTCGACTCTC-TATCCG-TCTCCCTCTCCCTCTCTGTAATAAATCATAAATATATATTAAAAAATAAAATAAAATGAAATTTATCTATCTTATCTTAT  
NW00581548.1 309324-310024(+) : GTTTCGACTCTC-TATCCG-TCTCCCTCTCCCTCTCTGTAATAAATCATAAATATATATTAAAAAATAAAATAAAATGAAATTTATCTATCTTATCTTAT  
NW00581074.1 1916119-1916819( : GTTTCGACTCTC-TATCCG-TCTCCCTCTCCCTCTCTGTAATAAATCATAAATATATATTAAAAAATAAAATAAAATGAAATTTATCTATCTTATCTTAT  
NW00581257.1 1814908-1815608( : GTTTCGACTCTC-TATCCG-TCTCCCTCTCCCTCTCTGTAATAAATCATAAATATATATTAAAAAATAAAATAAAATGAAATTTATCTATCTTATCTTAT  
NW00581204.1 792871-793571(+) : GTTTCGACTCTC-TATCCG-TCTCCCTCTCCCTCTCTGTAATAAATCATAAATATATATTAAAAAATAAAATAAAATGAAATTTATCTATCTTATCTTAT  
NW00581234.1 1560261-1560961( : GTTTCGACTCTC-TATCCG-TCTCCCTCTCCCTCTCTGTAATAAATCATAAATATATATTAAAAAATAAAATAAAATGAAATTTATCTATCTTATCTTAT  
NW00581108.1 3791526-3792266( : GTTTCGACTCTC-TATCCG-TCTCCCTCTCCCTCTCTGTAATAAATCATAAATATATATTAAAAAATAAAATAAAATGAAATTTATCTATCTTATCTTAT  
NW00581070.1 4853039-4853739( : GTTTCGACTCTC-TATCCG-TCTCCCTCTCCCTCTCTGTAATAAATCATAAATATATATTAAAAAATAAAATAAAATGAAATTTATCTATCTTATCTTAT  
NW005811070.1 7719605-7720305( : GTTTCGACTCTC-TATCCG-TCTCCCTCTCCCTCTCTGTAATAAATCATAAATATATATTAAAAAATAAAATAAAATGAAATTTATCTATCTTATCTTAT  
NW00581077.1 4437538-4438238( : GTTTCGACTCTC-TATCCG-TCTCCCTCTCCCTCTCTGTAATAAATCATAAATATATATTAAAAAATAAAATAAAATGAAATTTATCTATCTTATCTTAT  
NW005812385.1 65570-66270(-) : GTTTCGACTCTC-TATCCG-TCTCCCTCTCCCTCTCTGTAATAAATCATAAATATATATTAAAAAATAAAATAAAATGAAATTTATCTATCTTATCTTAT  
NW00581393.1 559596-5596296(-) : GTTTCGACTCTC-TATCCG-TCTCCCTCTCCCTCTCTGTAATAAATCATAAATATATATTAAAAAATAAAATAAAATGAAATTTATCTATCTTATCTTAT  
NW00581050.1 30269072-3026977( : GTTTCGACTCTC-TATCCG-TCTCCCTCTCCCTCTCTGTAATAAATCATAAATATATATTAAAAAATAAAATAAAATGAAATTTATCTATCTTATCTTAT  
NW00581082.1 4787073-4787773( : GTTTCGACTCTC-TATCCG-TCTCCCTCTCCCTCTCTGTAATAAATCATAAATATATATTAAAAAATAAAATAAAATGAAATTTATCTATCTTATCTTAT  
NW00581057.1 4766626-4767326( : GTTTCGACTCTC-TATCCG-TCTCCCTCTCCCTCTCTGTAATAAATCATAAATATATATTAAAAAATAAAATAAAATGAAATTTATCTATCTTATCTTAT  
NW00581288.1 1804237-1804937( : GTTTCGACTCTC-TATCCG-TCTCCCTCTCCCTCTCTGTAATAAATCATAAATATATATTAAAAAATAAAATAAAATGAAATTTATCTATCTTATCTTAT  
NW00581276.1 1905630-1906330( : GTTTCGACTCTC-TATCCG-TCTCCCTCTCCCTCTCTGTAATAAATCATAAATATATATTAAAAAATAAAATAAAATGAAATTTATCTATCTTATCTTAT  
NW005812525.1 7147-7847(+) : GTTTCGACTCTC-TATCCG-TCTCCCTCTCCCTCTCTGTAATAAATCATAAATAT
