# Supplementary material for: Analysis of SINE Families B2, Dip, and Ves with Special Reference to Polyadenylation Signals and Transcription Terminators
Source: MDPI journal article supplement (doi:10.3390/ijms22189897), 2021-09-13
Supplement: s1 [file s1]

Ves\_c : -----  
NW0587106 : TGTGTACCTTAGTTTAAAAATACAAGATTGACCCCTAGCGGTTTG-SCTCAGTGGATAGAGCATCGCG--GTGCGGAC--GAAGGTCCTCGGTTTGATTCCGTC-AAGGG--CATGACCTG-GGTTGCAGGCT--TATCCCG--GGCCTGTGTC--GAGC--TGTTGCAGGAGG  
NW0587126 : TGTCACGAGAAAATAAAATGATCATGACAGCCCTTAGCGGTTTG-ACTCAGTGGATAGAGCTGTCGCG--GTGCAGACT--GAAGGTCCTCGGTTTGATTCCGTC-AAGGG--CATGACCTG-GGTTGCAGGCT--TATCCCG--GGCCTGTGTC--GAGC--TGTTGCAGGAGG  
NW0587120 : CTAGTAAACAGCCTTAAAAAGAAACCTCCTAGCTAGCGGTTTG-SCTCAGTGGATAGAGCTGTCGCG--GTGTGGAC--AAAGATGCCAGGTTTGATTTCGGC-AAGGG--TATGACCTG-GGTTGCAGGCT--CTTC--CGAGCCTG--GGCCTGTGTC--AGGC--TGTTGCAGGAGT  
NW0587423 : TTTACCATTAAGAACTTAAATGTCATCTCAAGCTTGA--CGGCTTG-SCTCAGTGGATAGAGCTGTCGCG--GTGCAGAC--GAAGGTCCTCGGTTTGATTCCGTC-AAGGG--CATGACCTG-GGTTGCAGGCT--CTTC--CGAGCCTG--GGCCTGTGTC--AGGC--TGTTGCAGGAGT  
NW0587106 : GAATGACGAGAAATAAAAATGACATCACAAGCTTAA--CGAGTTTG-SCTCAGTGGATAGAGCTGTCGCG--GTGTGGTC--AAAGGTCCTCGGTTTGATTCCGTC-AAGGG--CATGACCTG-GGTTGCAGGCT--CTTC--CGAGCCTG--GGCCTGTGTC--AGGC--TGTTGCAGGAGT  
NW0587239 : TGCCTAAATAGCTTAAAAATGACATAAAGACCCCTTAG--TTGCTTGA-SCTCAGTGGATAGAGCTGTCGCG--GTGCAGAC--GAAGGTCCTCGGTTTGATTTCGTC-AAGGG--CATGACCTG-GGTTGCAGGCT--CTTC--CGAGCCTG--GGCCTGTGTC--AGGC--TGTTGCAGGAGG  
NW0587106 : ACAATAAAAAATCTAAAGATGAAGAAACCAAGCCCTAG--TTACTTTG-SCTCAGTGGATAGAGCTGTCGCG--GCATGGAC--AAAGATGCCAGGTTTGATTTCGTC-AAGGG--CATGACCTG-GGTTGCAGGCT--TCTC--TGGCCA--GGCCTGTGTC--GAGC--TCATGCAGGAA  
NW0587535 : TGCATATTGCATGTTTAAAGATTATCATCTTCCCTAG--CGA-TTG-SCTCAGTGGATAGAGCTGTCGCG--GTGCGTACT--GAAGGTCCTCGGTTTGATTTCGTC-AAGGG--TACATACCTG-GGTTGCAGGCT--CTTC--TGCTCTG--GGCCTGTGTC--GAGC--TCATGCAGGAA  
NW0587105 : TAAATAATAAGCACTTAAAGAAATTCCTGCCCTAG--CGAGTTTG-SCTCAGTGGATAGAGCTGTCGCG--GTGCGGAC--GAAGGTCCTCGGTTTGATTTCGTC-AAGGG--CATGACCTG-GGTTGCAGGCT--CTTC--CGAGCCTG--GGCCTGTGTC--AGGC--TCATGCAGGAGG  
NW0587117 : GAGGCCACAGAGCAATAAAGTGAAATATGCAAGCCCTAG--CGAGTTTG-SCTCAGTGGATAGAGCTGTCGCG--GTGAGGAC--AAAGGTCCTCGGTTTGATTTCGTC-AAGGG--CATGACCTG-GGTTGCAGGCT--CTTC--CGAGCCTG--GGCCTGTGTC--GAGC--TGTTGCAGGAGG  
NW0587110 : AGAATTGGCATCTAAATGAGATGTGTGCTGCCCTAG--CGGTTTG-SCTCAGTGGATAGAGCTGTCGCG--GTGCAGAC--GAGGTCCTCGGTTTGATTTCAGT-AAGGG--CATGACCTG-GGTTGCAGGCT--CTTC--TGCTCTG--GGCCTGTGTC--GAGC--TGTTGCAGGAGG  
NW0587123 : TTTATTACTCGAAGCTTTTAAATATATACATGAGT--CGAGTTTG-SCTCAGTGGATAGAGCTGTCGCG--TTGTGGAC--AAAGGTCCTCGGTTTGATTTCGTC-AAGGG--TACATACCTG-GGTTGCAGGCT--CTTC--TGGCCG--GACCTGTGTC--AGGC--ATGTCAGGAGG  
NW0587105 : TGCTGGAGGGCTAAGAAATGTCATATCTGCCCTAG--CGGTTTG-SCTCAGTGGATAGAGCTGTCGCG--GTGCTTAC--ACAGGTC-CAGAGTTTGATTTCGTC-AAGGG--CATGACCTG-GGTTGCAGGCT--CTTC--TGGCCG--GGCCTGTGTC--AGGC--TCATGCAGGAGG  
NW0587140 : TGCTGGAGGGGCTAAGAAATATCATATCTGCCCTAG--CGGTTTG-SCTCAGTGGATAGAGCTGTCGCG--GTGCTTAC--ACAGGTC-CAGAGTTTGATTTCGTC-AAGGG--CATGACCTG-GGTTGCAGGCT--CTTC--TGGCCG--GGCCTGTGTC--AGGC--TCATGCAGGAGG  
NW0587106 : TGCTGGAGGGGCTAAGAAATGTCATATCTGCCCTAG--CGGTTTG-SCTCAGTGGATAGAGCTGTCGCG--GTGCTTAC--ACAGGTC-CAGAGTTTGATTTCGTC-AAGGG--CATGACCTG-GGTTGCAGGCT--CTTC--TGGCCG--GGCCTGTGTC--AGGC--TCATGCAGGAGG  
NW0587106 : TGGAAGTGGTTGGTCAAGATGAGGACAGCCCTG--CGAGTTTG-SCTCAGTGGATAGAGCTGTCGCG--GTGTGGAC--AAAGGTCCTCGGTTTGATTTCGTC-AAGGG--CATGACCTG-GGTTGCAGGCT--CTTC--TGGCCG--GGCCTGTGTC--AGGC--TCATGCAGGAGG  
NW0587572 : AAGGAAAAATAAGTGTAAAAATGAAGACAGCCCTG--CGAGTTTG-SCTCAGTGGATAGAGCTGTCGCG--GTGTGGAC--AAAGGTCCTCGGTTTGATTTCGTC-AAGGG--CATGACCTG-GGTTGCAGGCT--CTTC--TGGCCG--GGCCTGTGTC--AGGC--TGTTGCAGGAGG  
NW0587263 : AATTCTCTTTTAAAGTAAAGAACACAGCCCTG--CGGTTTG-SCTCAGTGGATAGAGCTGTCGCG--GTGTGGAC--AAAGGTCCTCGGTTTGATTTCGTC-AAGGG--CATGACCTG-GGTTGCAGGCT--CTTC--TGGCCG--GGCCTGTGTC--AGGC--TGTTGCAGGAGG  
NW0587112 : AAAAATCTGTAAAAAAATAGTTCTAAGAGCCCTAG--TTGTTTG-SCTCAGTGGATAGAGCTGTCGCG--GTGCAGTT--GAAGGTCCTCGGTTTGATTTCGTC-AAGGG--CATGACCTG-GGTTGCAGGCT--CTTC--CGAGCCTG--GGCCTGTGTC--AGGC--TGTTGCAGGAGG  
NW0587113 : AAGAGCTCCAGGAAATAAAAATGTATTGCCCTG--CGAGTTTG-SCTCAGTGGATAGAGCTGTCGCG--GTGTGGAC--GAAGGTCCTCGGTTTGATTTCGTC-AAGGG--CATGACCTG-GGTTGCAGGCT--CTTC--CGGCTCG--GGCCTGTGTC--AGGC--TGTTGCAGGAGG  
NW0587132 : CAGGGATCTCATGTTAAAGTGAGGGTCACAGCCCTAG--AGGCTTG-SCTCAGTGGATAGAGCTGTCGCG--GTGTGGAC--GAAGGTCCTCGGTTTGATTTCGTC-AAGGG--CATGACCTG-GGTTGCAGGCT--CTTC--CGGCCCT--GGCCTGTGTC--AGGC--TGTTGCAGGAA  
NW0587123 : ATAATATTAGTTTAAAGATATAAACAATCAAGCCCTAG--CGAGTTTG-SCTCAGTGGATAGAGCTGTCGCG--GTGTGGAC--GAAGGTCCTCGGTTTGATTTCGTC-AAGGG--CATGACCTG-GGTTGCAGGCT--CTTC--TGGCCG--GGCCTGTGTC--AGGC--TCATGCAGGAGG  
NW0587121 : CCCCAACTGCTGGAACCTGAAGAGTTATTGCCCTAG--CGAGTTTG-SCTCAGTGGATAGAGCTGTCGCG--GTGTGGAC--GAAGGTCCTCGGTTTGATTTCGTC-AAGGG--CATGACCTG-GGTTGCAGGCT--CTTC--TGGCCG--GGCCTGTGTC--AGGC--TCATGCAGGAGG  
NW0587222 : CAGAGACCCCATATCAAAAGTTTTCCTATAGCCCTG--TAGTTTG-SCTCAGTGGATAGAGCTGTCGCG--GTGTGGAC--GAAGGTCCTCGGTTTGATTTCAGT-AAGGG--CATGACCTG-GGTTGCAGGCT--CTTC--TCATCTG--GGCCTGTGTC--AGGC--ATGTCAGGAGG  
NW0587114 : TATACTTAAACCTTACTTTAAGAAAAATCCCTGCTAG--ACTGTTG-SCTCAGTGGATAGAGCTGTCGCG--GTGTGGAC--AAAGGTCCTCGGTTTGATTTCGTC-AAGGG--CATGACCTG-GGTTGCAGGCT--CTTC--TGGCCG--GGCCTGTGTC--AGGC--ATGTCAGGAGG  
NW0587115 : TCAGCAGAAATAAAGTCTCTTATTATTITATCTAG--CGATTTG-SCTCAGTGGATAGAGCTGTCGCG--CATGTTT--CATGTTGCCAGGTTTGATTTCGTC-AAGGG--CATGACCTG-GGTTGCAGGCT--TGAT--CT--GACCTGTGTC--TCTC--GGGTCAGGAGG  
NW0587477 : ATGTCATAACCTCAAGATATAACCAATTTCCCTAG--CGAGTTTG-SCTCAGTGGATAGAGCTGTCGCG--GTGTGGAC--AAAGGTCCTCGGTTTGATTTCGTC-AAGGG--CATGACCTG-GGTTGCAGGCT--CTTC--TGGCCG--GGCCTGTGTC--AGGC--TCATGCAGGAGG  
NW0587107 : GAAAGCAGTAGACATGAAGAACCAATATCAGCCCTG--TGATTTG-SCTCAGTGGATAGAGCTGTCGCG--GTGTGGAC--GAAGGTCCTCGGTTTGATTTCGTC-AAGGG--CATGACCTG-GGTTGCAGGCT--CTTC--TGGCCG--GGCCTGTGTC--AGGC--TGTTGCAGGAGG  
NW0587112 : GTAGGCAAGCTTTTAAATGGTCTAAATGAGCCCTG--TAGTTTG-SCTCAGTGGATAGAGCTGTCGCG--GTGTGGAC--GAAGGTCCTCGGTTTGATTTCGTC-AAGGG--CATGACCTG-GGTTGCAGGCT--CTTC--TGGCCG--GGCCTGTGTC--AGGC--TGTTGCAGGAGG  
NW0587521 : AAATCAGCAATCTCAGATGAATAATATGTTGCCCTAG--CGAGTTTG-SCTCAGTGGATAGAGCTGTCGCG--GTGTGGAC--GAAGGTCCTCGGTTTGATTTCGTC-AAGGG--CATGACCTG-GGTTGCAGGCT--CTTC--TGGCCG--GGCCTGTGTC--AGGC--TGTTGCAGGAGG  
NW0587105 : AACTCCGTTTGAATCAAGGATAGTGCCCTAGCCCTG--CGGTTTG-SCTCAGTGGATAGAGCTGTCGCG--GTGTGGAC--AAAGGTCCTCGGTTTGATTTCGTC-AAGGG--CATGACCTG-GGTTGCAGGCT--CTTC--CGGCCCT--GGCCTGTGTC--AGGC--TGTTGCAGGAGG  
NW0587130 : TCTAAGTATCTATATAAATCAACAGTGTGCCCTAG--TOGTTTG-SCTCAGTGGATAGAGCTGTCGCG--GTGTGGAC--AAAGGTCCTCGGTTTGATTTCGTC-AAGGG--CATGACCTG-GGTTGCAGGCT--CTTC--GGGTCAG--GGCCTGTGTC--AGGC--TGTTGCAGGAGG  
NW0587112 : AACCTGCCACTGGGACAGGAGGGGTCCAGCCCTG--CGAGTTTG-SCTCAGTGGATAGAGCTGTCGCG--GTGTGGAC--GAAGGTCCTCGGTTTGATTTCGTC-AAGGG--CATGACCTG-GGTTGCAGGCT--CTTC--TGGCCG--GACCTGTGTC--AGGC--GTG-FCAGGAGG  
NW0587122 : GGATGTTACATGCTAATGAGTATGTGACAGCCCTAG--CGGTTTG-SCTCAGTGGATAGAGCTGTCGCG--GTGTGGAC--GAAGGTCCTCGGTTTGATTTCGTC-AAGGG--CATGACCTG-GGTTGCAGGCT--CTTC--TGGCCG--GGCCTGTGTC--AGGC--TGTTGCAGGAGG  
NW0587174 : GGCTGAAGGCCCAATCAATAGTAAATGAGCCCTG--CGGCTTG-SCTCAGTGGATAGAGCTGTCGCG--GTGTGGAC--GAAGGTCCTCGGTTTGATTTCGTC-AAGGG--CATGACCTG-GGTTGCAGGCT--CTTC--CAACCTG--AGGCTGTGTC--AGGC--TGTTGCAGGAGG  
NW0587129 : TTTATCTAAGTGTAAAGAAATCTCCCCAGCCCTAG--CGAGTTTG-SCTCAGTGGATAGAGCTGTCGCG--GTGTGGAC--GAAGGTCCTCGGTTTGATTTCGTC-AAGGG--CATGACCTG-GGTTGCAGGCT--CTTC--TGCTCTG--GCCCTGTGTC--AGGC--TGTTGCAGGAGT  
NW0587110 : TTTACAGTTTATTTAAAGATATATAAAGACCCCTAG--TGTTTG-SCTCAGTGGATAGAGCTGTCGCG--GTGTGGAC--AAAGGTCCTCGGTTTGATTTCGTC-AAGGG--CATGACCTG-GGTTGCAGGCT--CTTC--CGAGCCTG--GGCCTGTGTC--AGGC--TGTTGCAGGAGG  
NW0587118 : GAGTGCAAGAAATGAAGGAAAGTGTTGCTGCACTAG--TGTTTG-SCTCAGTGGATAGAGCTGTCGCG--GTGTGGAC--GAAGGTCCTCGGTTTGATTTCGTC-AAGGG--CATGACCTG-GGTTGCAGGCT--CTTC--GAGGTCG--GGCCTGTGTC--AGGC--TGTTGCAGGAGG  
NW0587104 : GTATAAATTAATAAATAAAGTATGTTGTTGCCCTAG--CGAGTTTG-SCTCAGTGGATAGAGCTGTCGCG--GTGTGGAC--AAAGGTCCTCGGTTTGATTTCGTC-AAGGG--CATGACCTG-GGTTGCAGGCT--CTTC--TGGCCG--GGCCTGTGTTGGGG--GAGGG--TGTTGCAGGAGG  
NW0587106 : CTAAATGTCTCTTAATAGAATAATACCAAGCCCTG--TOGTTTG-SCTCAGTGGATAGAGCTGTCGCG--GTGTGGAC--GAAGGTCCTCGGTTTGATTTCGTC-AAGGG--CATGACCTG-GGTTGCAGGCT--CTTC--TG-AGCCTGTGTC--AGGC--TGTTGCAGGAGG  
NW0587105 : CTAAAGCTTCTTAAATATATGACATATGCACTAG--CGGTTTG-SCTCAGTGGATAGAGCTGTCGCG--GTGTGGAC--GAAGGTCCTCGGTTTGATTTCGTC-AAGGG--CATGACCTG-GGTTGCAGGCT--CTTC--TG-AGCCTGTGTC--AGGC--TGTTGCAGGAGG  
NW0587110 : TTTGTTGATAAGTGTTTTAAAGAGTGTGGAAGCCCTAG--CGAGTTTG-SCTCAGTGGATAGAGCTGTCGCG--GTGTGGAC--GAAGGTCCTCGGTTTGATTTCGTC-AAGGG--CATGACCTG-GGTTGCAGGCT--CTTC--TG-AGCCTGTGTC--AGGC--TGTTGCAGGAGG  
NW0587104 : GGAATCAAAATAGCAATTGAAGGTGCGCAAGCCCTAG--CGAGTTTG-SCTCAGTGGATAGAGCTGTCGCG--GTGTGGAC--GAAGGTCCTCGGTTTGATTTCGTC-AAGGG--CATGACCTG-GGTTGCAGGCT--TGTT--CGGCTGTC--AGGC--TGTTGCAGGAGG  
NW0587133 : GGGATAGCTTTGGAATATTAAAAAGTGAAGAGTAGC--TAGTTTG-SCTCAGTGGATAGAGCTGTCGCG--GTGTGGAC--GAAGGTCCTCGGTTTGATTTCGTC-AAGGG--CATGACCTG-GGTTGCAGGCT--TGAT--CT--GGCCTGTGTC--AGGC--TGTTGCAGGAGG  
NW0587143 : GCGCTATTTTAAATTAAGAGGAGCTCAAGCCCTAG--TGTTTG-SCTCAGTGGATAGAGCTGTCGCG--GTGTGGAC--GAAGGTCCTCGGTTTGATTTCGTC-AAGGG--CATGACCTG-GGTTGCAGGCT--TGAT--CT--GGCCTGTGTC--AGGC--TGTTGCAGGAGG  
NW0587303 : AGGAAGCTTTCAGGGAAGCGGAAGTGTGCCCTAG--CGGTTTG-SCTCAGTGGATAGAGCTGTCGCG--GTGTGGAC--GAAGGTCCTCGGTTTGATTTCGTC-AAGGG--CATGACCTG-GGTTGCAGGCT--TGAT--CT--GGCCTGTGTC--AGGC--TGTTGCAGGAGG  
NW0587105 : TTTTATTTTAAAAAAATCTTTGCTTTGCCCTAG--TGCTTG-SCTCAGTGGATAGAGCTGTCGCG--GTGTGGAC--GAAGGTCCTCGGTTTGATTTCGTC-AAGGG--CATGACCTG-GGTTGCAGGCT--TGAT--CT--GGCCTGTGTC--AGGC--TGTTGCAGGAGG  
NW0587107 : ATGTAATTTATTTTAAAAATCAGATTTCTAGGACAG--CGAGTTTG-SCTCAGTGGATAGAGCTGTCGCG--GTGTGGAC--GAAGGTCCTCGGTTTGATTTCGTC-AAGGG--CATGACCTG-GGTTGCAGGCT--TGAT--CT--GGCCTGTGTC--AGGC--TGTTGCAGGAGG  
NW0587104 : AGTAGGTCCTTTAAAGATTGAGAGTTTCAAGCCCTAG--CGAGTTTG-SCTCAGTGGATAGAGCTGTCGCG--GTGTGGAC--GAAGGTCCTCGGTTTGATTTCGTC-AAGGG--CATGACCTG-GGTTGCAGGCT--TGAT--CT--GAGCTGTGTC--AGGC--TGTTGCAGGAGG  
NW0587153 : ACAAAAGTGAGGAGTAAAAATACAGGCTATGCCCTAG--CTGTTTG-SCTCAGTGGATAGAGCTGTCGCG--GTGTGGAC--GAAGGTCCTCGGTTTGATTTCGTC-AAGGG--CATGACCTG-GGTTGCAGGCT--TGAT--CT--GAGCTGTGTC--AGGC--TGTTGCAGGAGG  
NW0587120 : AGTTTCTCTGGCTATGAAGCGGGGTGAAGGCCCTG--CGGTTTG-SCTCAGTGGATAGAGCTGTCGCG--GTGTGGAC--GAAGGTCCTCGGTTTGATTTCGTC-AAGGG--CATGACCTG-GGTTGCAGGCT--TGAT--CT--GAGCTGTGTC--AGGC--TGTTGCAGGAGG  
NW0587109 : ACACACTCATGACCTCTTATTACTCTTTGGCCCTAG--TGATTTG-SCTCAGTGGATAGAGCTGTCGCG--GTGTGGAC--GAAGGTCCTCGGTTTGATTTCGTC-AAGGG--CATGACCTG-GGTTGCAGGCT--TGAT--CT--GAGCTGTGTC--AGGC--TGTTGCAGGAGG  
NW0587119 : TTGCCATATTGCCCTTGAAGAAAGAAAGACCCCTAG--CGAGTTTG-SCTCAGTGGATAGAGCTGTCGCG--GTGTGGAC--GAAGGTCCTCGGTTTGATTTCGTC-AAGGG--CATGACCTG-GGTTGCAGGCT--TGAT--CT--GAGCTGTGTC--AGGC--TGTTGCAGGAGG  
NW0587137 : AGCCACAGTCTCCCTCAATGAAGTATGATGACGCCCTAG--CGAGTTTG-SCTCAGTGGATAGAGCTGTCGCG--GTGTGGAC--GAAGGTCCTCGGTTTGATTTCGTC-AAGGG--CATGACCTG-GGTTGCAGGCT--TAAT--CT--GAGCTGTGTC--AGGC--TGTTGCAGGAGG  
NW0587134 : CATTCATCAGTTTAAAAATATAAGATGATGCAAGCTAG--CTGTTTG-SCTCAGTGGATAGAGCTGTCGCG--GTGTGGAC--GAAGGTCCTCGGTTTGATTTCGTC-AAGGG--CATGACCTG-GGTTGCAGGCT--TGAT--CT--GAGCTGTGTC--AGGC--TGTTGCAGGAGG  
NW0587139 : AATGGACATGTGACTAAAAATCTCGGTTCCCAAGCCCTAG--TGTTTG-SCTCAGTGGATAGAGCTGTCGCG--GTGTGGAC--GAAGGTCCTCGGTTTGATTTCGTC-AAGGG--CATGACCTG-GGTTGCAGGCT--TGAT--CT--GAGCTGTGTC--AGGC--TGTTGCAGGAGG  
NW0587106 : TGATATTATTTTAAAGAAATATTTTCTGCCCTG--CGAGTTTG-SCTCAGTGGATAGAGCTGTCGCG--GTGTGGAC--GAAGGTCCTCGGTTTGATTTCGTC-AAGGG--CATGACCTG-GGTTGCAGGCT--TGAT--CT--GAGCTGTGTC--AGGC--TGTTGCAGGAGG  
NW0587107 : GTGACTAGCTGGAAGCGGAAGTGAATCTAGCCCTG--TGTTTG-SCTCAGTGGATAGAGCTGTCGCG--GTGTGGAC--GAAGGTCCTCGGTTTGATTTCGTC-AAGGG--CATGACCTG-GGTTGCAGGCT--TGAT--CT--GAGCTGTGTC--AGGC--TGTTGCAGGAGG  
NW0587106 : CGGCGCGCGGCGCTAGTTTGCCACGGCTGAGCTAG--CGAGTTTG-SCTCAGTGGATAGAGCTGTCGCG--GTGTGGAC--GAAGGTCCTCGGTTTGATTTCGTC-AAGGG--CATGACCTG-GGTTGCAGGCT--TGAT--CT--GAGCTGTGTC--AGGC--TGTTGCAGGAGG  
NW0587140 : CTATACAGCTATAAATAAGAGGATCTCTTCCCTAG--TGTTTG-SCTCAGTGGATAGAGCTGTCGCG--GTGTGGAC--GAAGGTCCTCGGTTTGATTTCGTC-AAGGG--CATGACCTG-GGTTGCAGGCT--TGAT--CT--GAGCTGTGTC--AGGC--TGTTGCAGGAGG  
NW0587186 : ATTAGGTTAAAGTGTTTAAATAAAAAACATCCCTAG--TTGTTTG-SCTCAGTGGATAGAGCTGTCGCG--GTGTGGAC--GAAGGTCCTCGGTTTGATTTCGTC-AAGGG--CATGACCTG-GGTTGCAGGCT--TGAT--CT--GAGCTGTGTC--AGGC--TGTTGCAGGAGG  
NW0587126 : GAATTTAGTAAGTCAAGAGGATGTTCTTCCCTAG--CGGCTTG-SCTCAGTGGATAGAGCTGTCGCG--GTGTGGAC--GAAGGTCCTCGGTTTGATTTCGTC-AAGGG--CATGACCTG-GGTTGCAGGCT--TGAT--CT--GAGCTGTGTC--AGGC--TGTTGCAGGAGG  
NW0587104 : CTCAATGTTAGAAAAATATCTTATTTAGCCCTG--CGAGTTTG-SCTCAGTGGATAGAGCTGTCGCG--GTGTGGAC--GAAGGTCCTCGGTTTGATTTCGTC-AAGGG--CATGACCTG-GGTTGCAGGCT--TGAT--CT--GAGCTGTGTC--AGGC--TGTTGCAGGAGG  
NW0587114 : TGACGAGGAGGTAAGAAATGCCCCCATGCTGCTG--CGAGTTTG-SCTCAGTGGATAGAGCTGTCGCG--GTGTGGAC--GAAGGTCCTCGGTTTGATTTCGTC-AAGGG--CATGACCTG-GGTTGCAGGCT--TGAT--CT--GAGCTGTGTC--AGGC--TGTTGCAGGAGG  
NW0587116 : GGAAGACAGAGATGAAGACATCATGATGACCCCTAG--TGATTTG-SCTCAGTGGATAGAGCTGTCGCG--GTGTGGAC--GAAGGTCCTCGGTTTGATTTCGTC-AAGGG--CATGACCTG-GGTTGCAGGCT--TGAT--CT--GAGCTGTGTC--AGGC--TGTTGCAGGAGG  
NW0587105 : TATATTTTAGTAAAAAATTTGGGTCCGACCCCTAG--TGTTTG-SCTCAGTGGATAGAGCTGTCGCG--GTGTGGAC--GAAGGTCCTCGGTTTGATTTCGTC-AAGGG--CATGACCTG-GGTTGCAGGCT--TGAT--CT--GAGCTGTGTC--AGGC--TGTTGCAGGAGG  
NW0587107 : AAGACAGAGATAATAAATAAGAGGCTGAAACCCCTG--CGAGTTTG-SCTCAGTGGATAGAGCTGTCGCG--GTGTGGAC--GAAGGTCCTCGGTTTGATTTCGTC-AAGGG--CATGACCTG-GGTTGCAGGCT--TGAT--CT--GAGCTGTGTC--AGGC--TGTTGCAGGAGG  
NW0587117 : AATTAATGAGACATTAACATCAGTGGTTGCCCTG--CGAGTTTG-SCTCAGTGGATAGAGCTGTCGCG--GTGTGGAC--GAAGGTCCTCGGTTTGATTTCGTC-AAGGG--CATGACCTG-GGTTGCAGGCT--TGAT--CT--GAGCTGTGTC--AGGC--TGTTGCAGGAGG  
NW0587108 : TCAATAAATGGATGATAAAGATGTTATATGCCCTAG--CTAATTG-SCTCAGTGGATAGAGCTGTCGCG--GTGTGGAC--GAAGGTCCTCGGTTTGATTTCGTC-AAGGG--CATGACCTG-GGTTGCAGGCT--TGAT--CT--GAGCTGTGTC--AGGC--TGTTGCAGGAGG  
NW0587120 : TGTCAGAAAGGCCAATTAAGAGCTCTAGAGCCCTG--CGAGTTTG-SCTCAGTGGATAGAGCTGTCGCG--GTGTGGAC--GAAGGTCCTCGGTTTGATTTCGTC-AAGGG--CATGACCTG-GGTTGCAGGCT--TGAT--CT--GAGCTGTGTC--AGGC--TGTTGCAGGAGG  
NW0587122 : CCAATCATAAACAATTAATTAGGCATCAAGCTG--CGAGTTTG-SCTCAGTGGATAGAGCTGTCGCG--GTGTGGAC--GAAGGTCCTCGGTTTGATTTCGTC-AAGGG--CATGACCTG-GGTTGCAGGCT--TGAT--CT--GAGCTGTGTC--AGGC--TGTTGCAGGAGG  
NW0587109 : TGTCGCATATTTTTCAGAGGCGCATCGCACTTTG--GCTGTG-TCTCAGTGGATAGAGCTGTCGCG--GTGTGGAC--GAAGGTCCTCGGTTTGATTTCGTC-AAGGG--CATGACCTG-GGTTGCAGGCT--TGAT--CT--GAGCTGTGTC--AGGC--TGTTGCAGGAGG  
NW0587259 : CACACACAGGAGTTTAAAAACAAACAAACATCTG--CGGCTTG-SCTCAGTGGATAGAGCTGTCGCG--GTGTGGAC--GAAGGTCCTCGGTTTGATTTCGTC-AAGGG--CATGACCTG-GGTTGCAGGCT--TGAT--CT--GAGCTGTGTC--AGGC--TGTTGCAGGAGG

[illegible]

[illegible]
