# Supplementary material for: Analysis of SINE Families B2, Dip, and Ves with Special Reference to Polyadenylation Signals and Transcription Terminators
Source: MDPI journal article supplement (doi:10.3390/ijms22189897), 2021-09-13
Supplement: s1 [file s1]

**Table S6**  
**Multimeric SINEs containing Dip in *Allactaga bullata***

| Structure                   | Number of units | Multimer length, bp | Copy number | Number of Dip sequences |
|-----------------------------|-----------------|---------------------|-------------|-------------------------|
| B1-Dip-Dip-B1-Dip-B1-Dip-B1 | 8               | 1,498               | 5,060       | 20,240                  |
| B1-DIP-B1-DIP-B1-B1         | 6               | 1,071               | 13,996      | 27,992                  |
| B1-B1-Dip-B1-B1-Dip         | 6               | 1,081               | 7,846       | 15,692                  |
| Dip-Dip-Dip-B1-Dip          | 5               | 1,017               | 7,943       | 31,772                  |
| B1-Dip-B1                   | 3               | 550                 | 45,533      | 45,533                  |
| Dip-Dip-B1                  | 3               | 602                 | 36,668      | 73,336                  |
| Dip-Dip-Dip                 | 3               | 649                 | 19,797      | 59,391                  |
| B1-Dip-Dip                  | 3               | 589                 | 19,195      | 38,390                  |
| B1-B1-Dip                   | 3               | 589                 | 19,824      | 19,824                  |
| Dip-B1                      | 2               | 381                 | 91,922      | 91,922                  |
| Dip-Dip                     | 2               | 427                 | 63,606      | 127,212                 |
| B1-Dip                      | 2               | 374                 | 70,133      | 70,133                  |
| B1-B1                       | 2               | 321                 | 59,134      | -                       |
| B4 (ID-B1)                  | 2               | 289                 | 64,798      | -                       |
| monomeric                   |                 |                     |             |                         |
| B1                          | 1               | 153                 | 470,441     |                         |
| Dip                         | 1               |                     |             | 621,437                 |
| ID                          | 1               |                     | 112,631     |                         |
