# Supplementary material for: Analysis of SINE Families B2, Dip, and Ves with Special Reference to Polyadenylation Signals and Transcription Terminators
Source: MDPI journal article supplement (doi:10.3390/ijms22189897), 2021-09-13
Supplement: s1 [file s1]

**Table S4.** Random B2a copies in genomes of 16 mouse strains

| #  | Chromosome:<br>position   | Number<br>of mouse<br>strains +<br>rat | Tail with a terminator                  | Terminator    | A-rich<br>tail<br>length,<br>nt |
|----|---------------------------|----------------------------------------|-----------------------------------------|---------------|---------------------------------|
| 1  | chr11:11253175-11253361   | 16 + rat                               | TCTTTAAAAAAAAA                          | TCTTT         | 9                               |
| 2  | chr3:58979601-58979784    | 16                                     | TCTTTTAAAAAATTATTTTAAAAAA               | TCTTTT        | 6+7                             |
| 3  | chr11:87445563-87445758   | 16                                     | TCTTAAAAAAAAAAGAAA                      | TCTT          | 15                              |
| 4  | chr2:9900243-9900434      | 16                                     | TCTTTAAAAAAAAAAAA                       | TCTTT         | 12                              |
| 5  | chr11:106473456-106473644 | 16                                     | TTAAAAAAAAA                             | TT            | 9                               |
| 6  | chr4:40832833-40833016    | 16                                     | TCTTAAAAAAAAAAACCACAAAAAACCCAAAAA       | TCTT          | 29                              |
| 7  | chr16:17080102-17080296   | 16 + rat                               | TTTTTTTAAAAAAA                          | TTTTTTT       | 8                               |
| 8  | chr12:51201319-51201506   | 16                                     | TCTAAAAAAAAA                            | TCT           | 9                               |
| 9  | chr12:72597777-72597968   | 16 + rat                               | TCTTAAAAAGAAAAA                         | TCTT          | 13                              |
| 10 | chr1:72704299-72704490    | 16                                     | TCTTAAAAAAAAAAAAAAAAAAAAAAAAA           | TCTT          | 26                              |
| 11 | chr7:80888245-80888435    | 16 + rat                               | TCTTTTTTAAAAA                           | TCTTTTTT      | 6                               |
| 12 | chr7:44653577-44653763    | 16                                     | TCTTAAAAAAAATAAAAAA                     | TCTTT         | 16                              |
| 13 | chr1:131919929-131920106  | 16                                     | TCTTTTTTTTTTTTAA                        | TCTTTTTTTTTTT | 2                               |
| 14 | chr8:122558573-122558764  | 16                                     | TCTTTAAGAAAGAAAGAAAGAGAGAGAGAAAGGAAGAAA | TCTTT         | 34                              |
| 15 | chr2:120987919-120988111  | 16                                     | TCTTAAAAAAAAA                           | TCTT          | 9                               |
| 16 | chr13:63474573-63474762   | 16                                     | TCTTTAAAAAAAAAAAA                       | TCTTT         | 12                              |
| 17 | chr19:29681055-29681242   | 16                                     | TCTTAAAAAAAAAAAA                        | TCTT          | 12                              |
| 18 | chr12:58944138-58944323   | 16                                     | TCTTAAAAAAAAA                           | TCTTT         | 8                               |
| 19 | chr7:12902328-12902516    | 16                                     | TCTTAAAAAAGAAAAAGAAA                    | TCTT          | 17                              |
| 20 | chr6:29626515-29626698    | 16                                     | TCTTTAAAAAGAAAGAAAGAAAGAAAGAAAGAAA      | TCTTT         | 29                              |
| 21 | chr10:88850836-88851025   | 16                                     | TCTTTTAAAAA                             | TCTTTT        | 6                               |
| 22 | chr2:84016247-84016434    | 16                                     | TCTAAAAAAAAAAAAA                        | TCT           | 13                              |
| 23 | chr11:114799834-114800025 | 16                                     | TCTTAAAAAAAAAAAAAAAAAAAAA               | TCTT          | 18                              |
| 24 | chr4:11565217-11565398    | 16                                     | TCTTAAAAAAAAA                           | TCTTT         | 8                               |
| 25 | chr12:83518163-83518353   | 16                                     | TTATTTTAAAAA                            | TTTT          | 6                               |
| 26 | chr11:97116609-97116793   | 16                                     | TTATTTTAAAAA                            | TTTT          | 7                               |
| 27 | chr3:16280238-16280430    | 16                                     | TCTTTTTTTTAAAAAAA                       | TCTTTTTTTT    | 8                               |
| 28 | chr9:74161854-74162039    | 16                                     | TCTTTAAAAAAAAAAAAAGACA                  | TCTTT         | 16                              |
| 29 | chr4:132177838-132178025  | 16                                     | TCTTTAATTTAAAAAAA                       | TCTTT         | 14 ?                            |
| 30 | chr9:108932108-108932298  | 16                                     | TATTTTAAATAAATAAA                       | TTTTT         | 11                              |
| 31 | chr19:45969930-45970128   | 16                                     | TTTCTTTAAAAAAAAAAGAAA                   | TCTTT         | 14                              |
| 32 | chr1:74318336-74318545    | 16                                     | TCTTTTAAAAATTTTAAAAAAGAGAGAGAGAGAG      | TCTTTT        | 28 ?                            |

|    |                          |          |                        |          |    |
|----|--------------------------|----------|------------------------|----------|----|
| 33 | chrX:135033311-135033498 | 16       | CCTTTTTAAAAAAA         | TTTT     | 8  |
| 34 | chr6:126808958-126809142 | 16       | TCTAAAAAAA             | TCT      | 11 |
| 35 | chr1:139443079-139443263 | 16       | TCTTAA                 | TCTT     | 3  |
| 36 | chr2:131598117-131598299 | 16       | TCTTTAAAAAAGAAAA       | TCTTT    | 12 |
| 37 | chr10:4342045-4342228    | 16       | TCTTTAAAAAAA           | TCTTT    | 8  |
| 38 | chr4:43997138-43997327   | 16       | TCTTAAAAAAAAAAAA       | TCTT     | 14 |
| 39 | chr1:135353308-135353492 | 16 + rat | TCTTTAAAAAAA           | TCTTT    | 8  |
| 40 | chr1:134740547-134740737 | 16       | TCTTAACAAAAAATAATA     | TCTT     | 15 |
| 41 | chr17:42841435-42841623  | 16       | TTAAAGAAAAAAA          | TT       | 12 |
| 42 | chr11:5162698-5162891    | 16       | TCTTTTTAAAAAAA         | TCTTTT   | 7  |
| 43 | chr2:152921603-152921793 | 16       | TCTTTAAAAAAAAAAAA      | TCTTT    | 13 |
| 44 | chr7:79331615-79331797   | 16       | TTTTCTTTAAAAAAA        | TTTTCTTT | 7  |
| 45 | chr15:5102826-5103034    | 16       | TCTTTAAAAAAA           | TCTTT    | 7  |
| 46 | chr12:84078508-84078689  | 16       | TCTTTAGAAAAAAGAAAAAGAA | TCTTT    | 20 |
| 47 | chr5:107389963-107390149 | 16       | TCTTTAAAAAAA           | TCTTT    | 9  |
| 48 | chr8:111324306-111324495 | 16 + rat | TCTTTAAAAAAA           | TCTTT    | 7  |
| 49 | chr4:135995984-135996172 | 16       | TCTTTAAAAAAA           | TCTTT    | 10 |
| 50 | chr16:10855044-10855232  | 16       | TCTTAAAAAACAAAA        | TCTT     | 12 |
| 51 | chr1:59793467-59793649   | 16       | TCTTTAAAAAAA           | TCTTT    | 9  |
| 52 | chr4:116930235-116930417 | 16       | TCTTAAAAAAA            | TCTT     | 7  |
| 53 | chr11:51758764-51758951  | 16       | TCTTAAAAAAA            | TCTT     | 10 |
| 54 | chr1:55076708-55076885   | 16       | TCTTAAAAAAA            | TCTT     | 10 |
| 55 | chr7:46921268-46921458   | 16       | TCTTTTTAAAAAATAAAA     | TCTTTTT  | 12 |
| 56 | chr4:156211095-156211288 | 16       | TCTTTAAAAAAAAAAGAAAGAA | TCTTT    | 20 |
| 57 | chr1:9914899-9915079     | 16       | TTTAAAAAA              | TTT      | 7  |
| 58 | chr10:58581064-58581253  | 16       | TCTTAAAAAAAAAAAA       | TCTT     | 15 |
| 59 | chrX:93479646-93479832   | 16       | TCTTTTTAAAAAAA         | TCTTTTT  | 7  |
| 60 | chr2:71352944-71353129   | 16       | TTTTAAAAA              | TTTT     | 5  |
| 61 | chrX:102410389-102410581 | 16       | TCTTTTAAAAAAAAA        | TCTTTT   | 10 |
| 62 | chr9:40814648-40814839   | 16       | TCTTAAAAAAAAA          | TCTT     | 11 |
| 63 | chr1:86486479-86486671   | 16       | TCTTCAAAAAA            | TCTT     | 9  |
| 64 | chrX:101367251-101367434 | 16       | TTTTAAAAA              | TTTT     | 6  |
| 65 | chr1:63184386-63184576   | 16       | TCTTAAAAAAAAA          | TCTT     | 10 |
| 66 | chr1:44054311-44054497   | 16       | TCTTTAAAAAAA           | TCTTT    | 8  |
| 67 | chr5:121391506-121391695 | 16       | TCTTCAACAAAAA          | TCTT     | 13 |
| 68 | chr2:71104394-71104585   | 16       | TCTTTAAAAAAA           | TCTTT    | 8  |

|     |                          |          |                           |               |    |
|-----|--------------------------|----------|---------------------------|---------------|----|
| 69  | chr16:96076681-96076873  | 16       | TCITTTAAAAAAAAAAAAA       | TCITTT        | 16 |
| 70  | chr4:108733470-108733658 | 16       | TCITTTTTTAAAAAAA          | TCITTTTTT     | 7  |
| 71  | chr18:20859543-20859731  | 16       | TCITTTAAAAAAA             | TCITTT        | 9  |
| 72  | chr9:53458176-53458365   | 16       | TCITTTAAAAAAA             | TCITTT        | 7  |
| 73  | chr6:137038476-137038667 | 16       | TCITTAIAAAAAAAAA          | TCIT          | 11 |
| 74  | chr11:14117171-14117367  | 16       | TTTAAAAAAAA               | TTT           | 9  |
| 75  | chr9:99231994-99232154   | 16       | TCITTTAAAAAAA             | TCITTT        | 6  |
| 76  | chrX:142384174-142384361 | 16       | TCITTTAAAAAAA             | TCITTT        | 6  |
| 77  | chr10:93952407-93952595  | 16       | TTTTACAAAA                | TTTT          | 6  |
| 78  | chr17:28949098-28949288  | 16       | TCITTCIAIAIAAGAAAA        | TCIT          | 14 |
| 79  | chr7:141286621-141286808 | 16 + rat | TCITTAIAIAIAIAIAIA        | TCIT          | 11 |
| 80  | chr11:87963942-87964124  | 16       | TCITTTTTTTTTTTAAA         | TCITTTTTTTTTT | 3  |
| 81  | chr11:97266785-97266969  | 16       | TTAIAIAIAIAIAIAIAIA       | TT            | 16 |
| 82  | chr10:67084395-67084581  | 16 + rat | TTAIAIAIAIAIAIAIA         | TT            | 11 |
| 83  | chr14:52153728-52153928  | 16 + rat | TCITTAIAIAIAIA            | TCIT          | 6  |
| 84  | chr13:9021926-9022123    | 16       | TTTTTTAIAIAAGGAAAA        | TTTTTT        | 13 |
| 85  | chr5:99776422-99776617   | 16 + rat | TCITTTAIAIAIAIAIAIAIAIA   | TCITTT        | 14 |
| 86  | chr19:28660709-28660898  | 16       | TCITTTTTTAAAAA            | TCITTTTTT     | 5  |
| 87  | chr7:98445838-98446027   | 16       | TTTIAIAIAIAAGAAAAAGAAAA   | TTT           | 19 |
| 88  | chr5:115497460-115497654 | 16       | CCITTTAAAA                | TTT           | 4  |
| 89  | chr14:55209292-55209483  | 16       | TTTTTTTTTTAIAIAIAIA       | TTTTTTTTT     | 7  |
| 90  | chr13:54476657-54476859  | 16       | TCITTAIAIAIAIAIAIAIAIA    | TCIT          | 14 |
| 91  | chr1:89983521-89983718   | 16       | TTTTTTTAAAAAAA            | TTTTTTT       | 6  |
| 92  | chr11:52041315-52041499  | 16 + rat | TCITTTAGAAAAA             | TCITTT        | 8  |
| 93  | chr1:156060816-156061003 | 16       | TCITTAIAIAIAIAIAIAIA      | TCIT          | 12 |
| 94  | chr6:100414122-100414307 | 16       | TTCTTTAAAAA               | TCITTT        | 7  |
| 95  | chr3:113768153-113768345 | 16       | TTTAAAAAAAA               | TTT           | 8  |
| 96  | chr17:28794966-28795150  | 16 + rat | CCITTTAAGAA               | TTTT          | 5  |
| 97  | chr17:29196508-29196704  | 16       | TCITTTTTTTAIAIAIAIAIA     | TCITTTTTTT    | 8  |
| 98  | chr14:62928931-62929124  | 16       | TTTAAAAAAAA               | TTT           | 8  |
| 99  | chr4:124105585-124105773 | 16       | TCITTTAAAAAAA             | TCITTT        | 6  |
| 100 | chr12:86096247-86096466  | 16       | TCITTAIAIAIAIAIAIAIAIAIA  | TCIT          | 16 |
| 101 | chr10:27573065-27573242  | 16       | TCITTTTTTGAAAAA           | TCITTTTTT     | 6  |
| 102 | chrX:162704808-162705004 | 16       | TCITTTAIAIAIAIAIAIAIA     | TCITTT        | 12 |
| 103 | chr6:95815808-95816005   | 16       | TCITTTAIAIAIAIAIAIAIAIAIA | TCITTT        | 18 |
| 104 | chr2:25816010-25816199   | 16       | TCITTTTTTAAAAAAA          | TCITTTTTT     | 7  |

|     |                          |          |                  |           |                    |
|-----|--------------------------|----------|------------------|-----------|--------------------|
| 105 | chr18:35304838-35305023  | 16 + rat | TCTTTTAAAAAAA    | TCTTTT    | 7                  |
| 106 | chr15:99009278-99009464  | 16 + rat | TCTTACAAAACAAAA  | TCTT      | 12                 |
| 107 | chr10:84552809-84552993  | 16 + rat | TTTTTAAAAA       | TTTTT     | 5                  |
| 108 | chr15:84109854-84110050  | 16       | TCTTTTTTTAAAAAAA | TCTTTTTTT | 8                  |
| 109 | chr11:80082956-80083146  | 16       | TCTTTAAGAAAAA    | TCTTT     | 12                 |
| 110 | chr9:110059856-110060037 | 16       | TCTTTAAAAA       | TCTTT     | 5                  |
| 111 | chr9:75487303-75487490   | 16 + rat | TTTTTTAAAA       | TTTTTT    | 4                  |
|     |                          |          |                  |           | Mean length = 10.5 |

#### Terminator statistics

| Sequences              | Number | Fraction |
|------------------------|--------|----------|
| TC(T) <sub>&gt;3</sub> | 34     | 30.6%    |
| TCTTT                  | 36     | 32.4%    |
| TCTT                   | 28     | 25.2%    |
| Others                 | 13     | 11.7%    |
