# Supplementary material for: Analysis of SINE Families B2, Dip, and Ves with Special Reference to Polyadenylation Signals and Transcription Terminators
Source: MDPI journal article supplement (doi:10.3390/ijms22189897), 2021-09-13
Supplement: s1 [file s1]

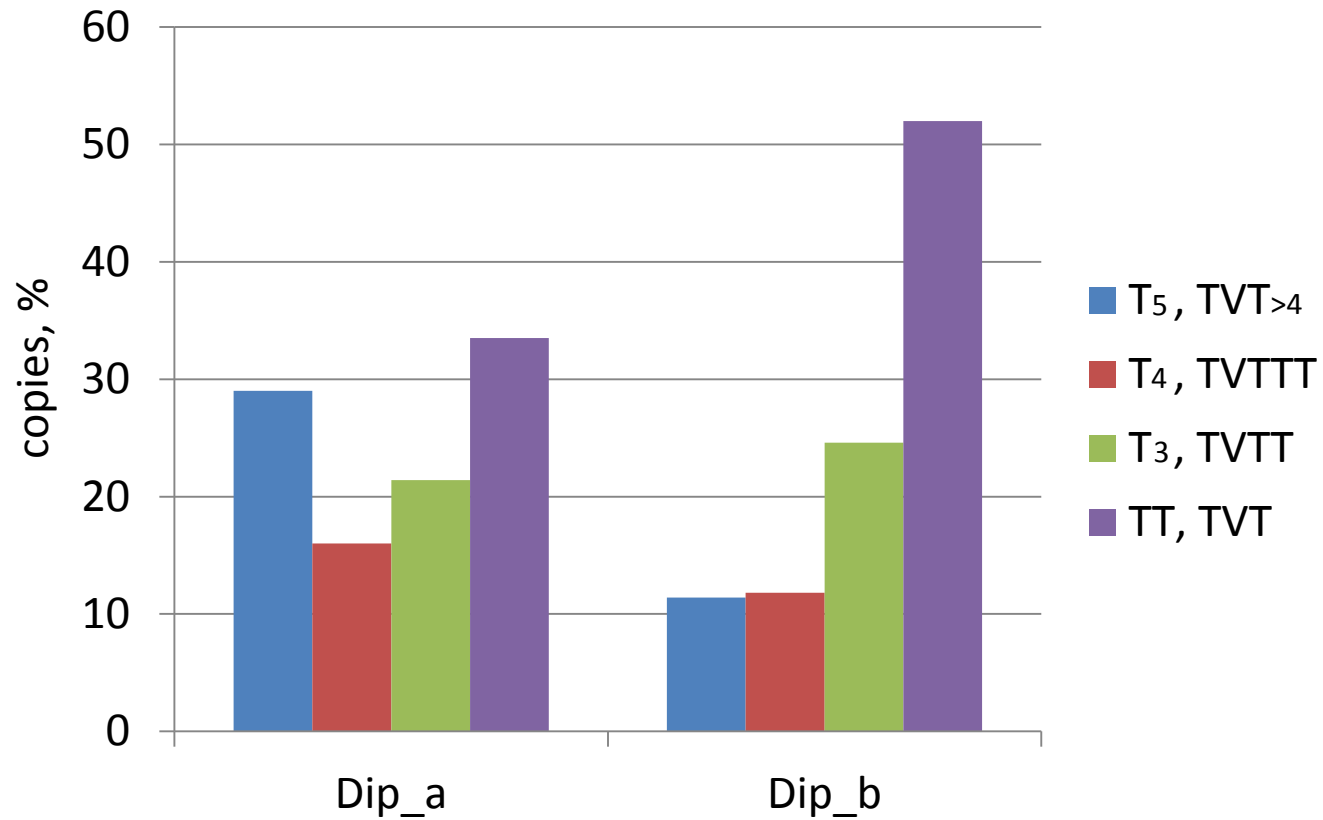

**Figure S7.** Terminators in Dip\_a and Dip\_b copies with A5-10 tails. The diagram is based on data from Table S7.
