# Supplementary material for: Analysis of SINE Families B2, Dip, and Ves with Special Reference to Polyadenylation Signals and Transcription Terminators
Source: MDPI journal article supplement (doi:10.3390/ijms22189897), 2021-09-13
Supplement: s1 [file s1]

[illegible]



```

Ves alY 27 : GGTGTGCAGGAGGCAGCTGATCGATGTTTCTCTCTCATC---GATGTTTCTAACTCTCTATCTCTCTCCCTTCCTCTCTGTAAAAAATCAATAAAATATATTTAAAAA
Ves alY 14-2 : AGTGTGCAGGAGGCAGCTGATCGATGTTTCTCTCTCATC---GATGTTTCTAACTCTCTATCTCTCTCCCTTCCTCTCTGTAAAAAATCAATAAAATATATTTAAAAA
Ves alY 15-3 : GATGTGCAGGAGGCAGCTGATCGATGTTTCTCTCTCATC---GATGTTTCTAACTCTCTATCTCTCTCCCTTCCTCTCTGTAAAAAATCAATAAAATATATTTAAAAA
Ves alY 31-2 : GGTGTGCAGGAGGCAGCTGATCGATGTTTCTCTCTCATC---GATGTTTCTAACTCTCTATCTCTCTCCCTTCCTCTCTGTAAAAAATCAATAAAATATATTTAAAAA
Ves alY 14-3 : GATGTGCAGGAGGCAGCTGGTCGATGTTTCTCTCTCATC---GATGTTTCTAACTCTCTATCTCTCTCCCTTCCTCTCTGTAAAAAATCAATAAAATATATTTAAAAA
Ves alY 42 : GATGTGCAGGAGGCAGCTGGTCGATGTTTCTCTCTCATC---GATGTTTCTAACTCTCTATCTCTCTCCCTTCCTCTCTGTAAAAAATCAATAAAATATATTTAAAAA
Ves alY 13-4 : GATGTGCAGGAGGCAGCTGGTCGATGTTTCTCTCTCATC---GATGTTTCTAACTCTCTATCTCTCTCCCTTCCTCTCTGTAAAAAATCAATAAAATATATTTAAAAA
Ves alY 181 : GATGTGCAGGAGGCAGCTGATCGATGTTTCTCTCTCATC---GATGTTTCTAACTCTCTATCTCTCTCCCTTCCTCTCTGTAAAAAATCAATAAAATATATTTAAAAA
Ves alY 11-5 : GATGTGCAGGAGGCAGCTGATCGATGTTTCTCTCTCATC---GATGTTTCTAACTCTCTATCTCTCTCCCTTCCTCTCTGTAAAAAATCAATAAAATATATTTAAAAA
Ves alY 16-2 : GATGTGCAGGAGGCAGCTGATCGATGTTTCTCTCTCATC---GATGTTTCTAACTCTCTATCTCTCTCCCTTCCTCTCTGTAAAAAATCAATAAAATATATTTAAAAA
Ves alY 32 : GATGTGCAGGAGGCAGCTGATCGATGTTTCTCTCTCATC---GATGTTTCTAACTCTCTATCTCTCTCCCTTCCTCTCTGTAAAAAATCAATAAAATATATTTAAAAA
Ves alY 14-4 : GATGTGCAGGAGGCAGCTGGTCGATGTTTCTCTCTCATC---GATGTTTCTAACTCTCTATCTCTCTCCCTTCCTCTCTGTAAAAAATCAATAAAATATATTTAAAAA
Ves alY 14-5 : GGTGTGCAGGAGGCAGCTGATCGATGTTTCTCTCTCATC---GATGTTTCTAACTCTCTATCTCTCTCCCTTCCTCTCTGTAAAAAATCAATAAAATATATTTAAAAA
Ves alY 30-1 : GATGTGCAGGAGGCAGCTGATCGATGTTTCTCTCTCATC---GATGTTTCTAACTCTCTATCTCTCTCCCTTCCTCTCTGTAAAAAATCAATAAAATATATTTAAAAA
Ves alY 12-2 : GATGTGCAGGAGGCAGCTGATCGATGTTTCTCTCTCATC---GATGTTTCTAACTCTCTATCTCTCTCCCTTCCTCTCTGTAAAAAATCAATAAAATATATTTAAAAA
Ves alY 13-5 : GATGTGCAGGAGGCAGCTGATGTTTCTCTCTCATC---GATGTTTCTAACTCTCTATCTCTCTCCCTTCCTCTCTGTAAAAAATCAATAAAATATATTTAAAAA
Ves alY 11-6 : GATGTGCAGGAGGCAGCTGATCGATGTTTCTCTCTCATC---GATGTTTCTAACTCTCTATCTCTCTCCCTTCCTCTCTGTAAAAAATCAATAAAATATATTTAAAAA
Ves alY 17-2 : GATGTGCAGGAGGCAGCTGGTCGATGTTTCTCTCTCATC---GATGTTTCTAACTCTCTATCTCTCTCCCTTCCTCTCTGTAAAAAATCAATAAAATATATTTAAAAA
Ves alY 11-7 : GATGTGCAGGAGGCAGCTGATCGATGTTTCTCTCTCATC---GATGTTTCTAACTCTCTATCTCTCTCCCTTCCTCTCTGTAAAAAATCAATAAAATATATTTAAAAA
Ves alY 15-4 : GATGTGCAGGAGGCAGCTGATCGATGTTTCTCTCTCATC---GATGTTTCTAACTCTCTATCTCTCTCCCTTCCTCTCTGTAAAAAATCAATAAAATATATTTAAAAA
Ves alY 15-5 : GATGTGCAGGAGGCAGCTGATCGATGTTTCTCTCTCATC---GATGTTTCTAACTCTCTATCTCTCTCCCTTCCTCTCTGTAAAAAATCAATAAAATATATTTAAAAA
Ves alY 40-2 : GATGTGCAGGAGGCAGCTGATCGATGTTTCTCTCTCATC---GATGTTTCTAACTCTCTATCTCTCTCCCTTCCTCTCTGTAAAAAATCAATAAAATATATTTAAAAA
Ves alY 17-3 : GATGTGCAGGAGGCAGCTGATCGATGTTTCTCTCTCATC---GATGTTTCTAACTCTCTATCTCTCTCCCTTCCTCTCTGTAAAAAATCAATAAAATATATTTAAAAA
Ves alY 48 : GATGTGCAGGAGGCAGCTGATGTTTCTCTCTCATC---GATGTTTCTAACTCTCTATCTCTCTCCCTTCCTCTCTGTAAAAAATCAATAAAATATATTTAAAAA
Ves alY 10-4 : GATGTGCAGGAGGCAGCTGATGTTTCTCTCTCATC---GATGTTTCTAACTCTCTATCTCTCTCCCTTCCTCTCTGTAAAAAATCAATAAAATATATTTAAAAA
Ves alY 18 : GATGTGCAGGAGGCAGCTGATCGATGTTTCTCTCTCATC---GATGTTTCTAACTCTCTATCTCTCTCCCTTCCTCTCTGTAAAAAATCAATAAAATATATTTAAAAA
Ves alY 10-5 : GATGTGCAGGAGGCAGCTGGTCGATGTTTCTCTCTCATC---GATGTTTCTAACTCTCTATCTCTCTCCCTTCCTCTCTGTAAAAAATCAATAAAATATATTTAAAAA
Ves alY 17-4 : GATGTGCAGGAGGCAGCTGGTCGATGTTTCTCTCTCATC---GATGTTTCTAACTCTCTATCTCTCTCCCTTCCTCTCTGTAAAAAATCAATAAAATATATTTAAAAA
Ves alY 10-6 : GGTGTGCAGGAGGCAGCTGATCGATGTTTCTCTCTCATC---GATGTTTCTAACTCTCTATCTCTCTCCCTTCCTCTCTGTAAAAAATCAATAAAATATATTTAAAAA
Ves alY 11-8 : GGTGTGCAGGAGGCAGCTGATCGATGTTTCTCTCTCATC---GATGTTTCTAACTCTCTATCTCTCTCCCTTCCTCTCTGTAAAAAATCAATAAAATATATTTAAAAA
Ves alY 1 : GGTGTGCAGGAGGCAGCTGATCGATGTTTCTCTCTCATC---GATGTTTCTAACTCTCTATCTCTCTCCCTTCCTCTCTGTAAAAAATCAATAAAATATATTTAAAAA
Ves alY 14-6 : AGTGTGCAGGAGGCAGCTGATCGATGTTTCTCTCTCATC---GATGTTTCTAACTCTCTATCTCTCTCCCTTCCTCTCTGTAAAAAATCAATAAAATATATTTAAAAA
Ves alY 10-7 : GGTGTGCAGGAGGCAGCTGGTCGATGTTTCTCTCTCATC---GATGTTTCTAACTCTCTATCTCTCTCCCTTCCTCTCTGTAAAAAATCAATAAAATATATTTAAAAA
Ves alY 11-9 : GATGTGCAGGAGGCAGCTGATCGATGTTTCTCTCTCATC---GATGTTTCTAACTCTCTATCTCTCTCCCTTCCTCTCTGTAAAAAATCAATAAAATATATTTAAAAA
Ves alY 11-10 : GATGTGCAGGAGGCAGCTGATCGATGTTTCTCTCTCATC---GATGTTTCTAACTCTCTATCTCTCTCCCTTCCTCTCTGTAAAAAATCAATAAAATATATTTAAAAA
Ves alY 30-2 : GATGTGCAGGAGGCAGCTGATCGATGTTTCTCTCTCATC---GATGTTTCTAACTCTCTATCTCTCTCCCTTCCTCTCTGTAAAAAATCAATAAAATATATTTAAAAA
Ves alY 14-7 : GATGTGCAGGAGGCAGCTGATCGATGTTTCTCTCTCATC---GATGTTTCTAACTCTCTATCTCTCTCCCTTCCTCTCTGTAAAAAATCAATAAAATATATTTAAAAA
Ves alY 35 : GATGTGCAGGAGGCAGCTG-----ATC---GATGTTTCTAACTCTCTATCTCTCTCCCTTCCTCTCTGTAAAAAATCAATAAAATATATTTAAAAA
Ves alY 17-5 : GGTGTGCAGGAGGCAGCTG-----ATC---GATGTTTCTAACTCTCTATCTCTCTCCCTTCCTCTCTGTAAAAAATCAATAAAATATATTTAAAAA
Ves alY 12-3 : GATGTGCAGGAGGCAGCTG-----ATC---GATGTTTCTAACTCTCTATCTCTCTCCCTTCCTCTCTGTAAAAAATCAATAAAATATATTTAAAAA
Ves_a2 : GCGTGTGCAGGAGGCAGCTGATCGATGTTTCTCTCTCATCATTGATGTTTCTAACTCTCTATCTCTCTCCCTTCCTCTCTGTAAAAAATCAATAAAATATATTTAAAAA

```

**Figure S29.** Consensus sequences of 81 tribes of young Ves\_a. All copies correspond to Ves\_a1. The consensus sequence of the tribes (Ves\_a1Y) is shown above. The number of copies in each tribe is indicated in red. The names of six tribes that are less similar are highlighted in yellow and blue. The consensus sequences of Ves\_a1 and Ves\_a2 subfamilies are also specified.
