# Supplementary material for: Analysis of SINE Families B2, Dip, and Ves with Special Reference to Polyadenylation Signals and Transcription Terminators
Source: MDPI journal article supplement (doi:10.3390/ijms22189897), 2021-09-13
Supplement: s1 [file s1]

Dip\_a2 :
\* 20 \* 40 \* 60 \* 80 \* 100 \* 120 \* 140 \* 160
FVKW10002558.1 11008-113 :
FVKW10029136.1 23581-239 :
FVKW10000589.1 135060-13 :
FVKW10020349.1 16044-164 :
FVKW10014280.1 21974-223 :
FVKW10011519.1 52402-527 :
FVKW10016125.1 39943-403 :
FVKW10000231.1 94686-950 :
FVKW1001035610.1 11911-122 :
FVKW10026475.1 9342-9658 :
FVKW100078194.1 4967-5325 :
FVKW10039104.1 18258-186 :
FVKW10004589.1 86596-869 :
FVKW10123424.1 1124-1486 :
FVKW10029995.1 24234-246 :
FVKW10007643.1 14773-150 :
FVKW100501292.1 340-704 :
FVKW10007508.1 31690-320 :
FVKW10011261.1 4137-415 :
FVKW100102549.1 9281-9659 :
FVKW10019666.1 28292-286 :
FVKW10009732.1 44856-452 :
FVKW10011470.1 54767-551 :
FVKW10008749.1 56369-567 :
FVKW100079352.1 3426-3804 :
FVKW10035068.1 14139-144 :
FVKW10000107.1 213527-21 :
FVKW10029630.1 1406-1765 :
FVKW10310127.1 1-345 :
FVKW100109133.1 30511-308 :
FVKW10040125.1 701-1061 :
FVKW10048190.1 1930-2283 :
FVKW10026919.1 21877-222 :
FVKW10000550.1 28468-287 :
FVKW10089413.1 1581-1948 :
FVKW10032691.1 4367-4686 :
FVKW10001938.1 60210-605 :
FVKW10006965.1 42457-428 :
FVKW10045266.1 5078-5437 :
FVKW10017383.1 3298-3668 :
FVKW10014931.1 44237-445 :
FVKW10037970.1 18853-191 :
FVKW10039898.1 14191-145 :
FVKW10045310.1 14159-145 :
FVKW10012695.1 5046-5388 :
FVKW10068876.1 6413-6758 :
FVKW10001837.1 16628-169 :
FVKW10026710.1 4449-4811 :
FVKW10061098.1 5450-5829 :
FVKW10007967.1 64083-643 :
FVKW10003477.1 92791-931 :
FVKW10017109.1 10132-104 :
FVKW10017184.1 18429-187 :
FVKW10468666.1 98-391 :
FVKW10059314.1 3862-4222 :
FVKW10026833.1 23156-235 :
FVKW10030933.1 17567-179 :
FVKW10380129.1 4-365 :
FVKW10022917.1 7220-7595 :
FVKW10009570.1 50988-513 :
FVKW10010357.1 28854-291 :
FVKW10003724.1 51904-522 :
FVKW10012185.1 30202-305 :
FVKW10128847.1 1569-1911 :
FVKW10005041.1 17350-176 :
FVKW10033832.1 14304-146 :
FVKW1017580.1 100-407 :
FVKW10056700.1 136-446 :
FVKW10012445.1 8302-8672 :
FVKW10000401.1 27682-280 :
FVKW10004669.1 3155-3516 :
FVKW10000036.1 330313-33 :
FVKW10014660.1 45369-457 :



|                                    | Copy number | Proportion |
|------------------------------------|-------------|------------|
| T <sup>+</sup> copies              | 48          | 62%        |
| Conventional T <sup>+</sup> copies | 4           | 5%         |
| T <sup>-</sup> copies              | 25          | 33%        |
| Total                              | 77          |            |

**Figure S9.** Random Dip\_a2 copies from the *A. bullata* genome. Nucleotide sequences are highlighted as follows: PASS, strong pol III terminators, medium terminators, rudimentary terminators, and oligo(A). Conventional T<sup>+</sup> copies do not contain either a terminator or an oligo(A).
