# Supplementary figures and images for: Analysis of SINE Families B2, Dip, and Ves with Special Reference to Polyadenylation Signals and Transcription Terminators
Source: MDPI journal article supplement (doi:10.3390/ijms22189897), 2021-09-13

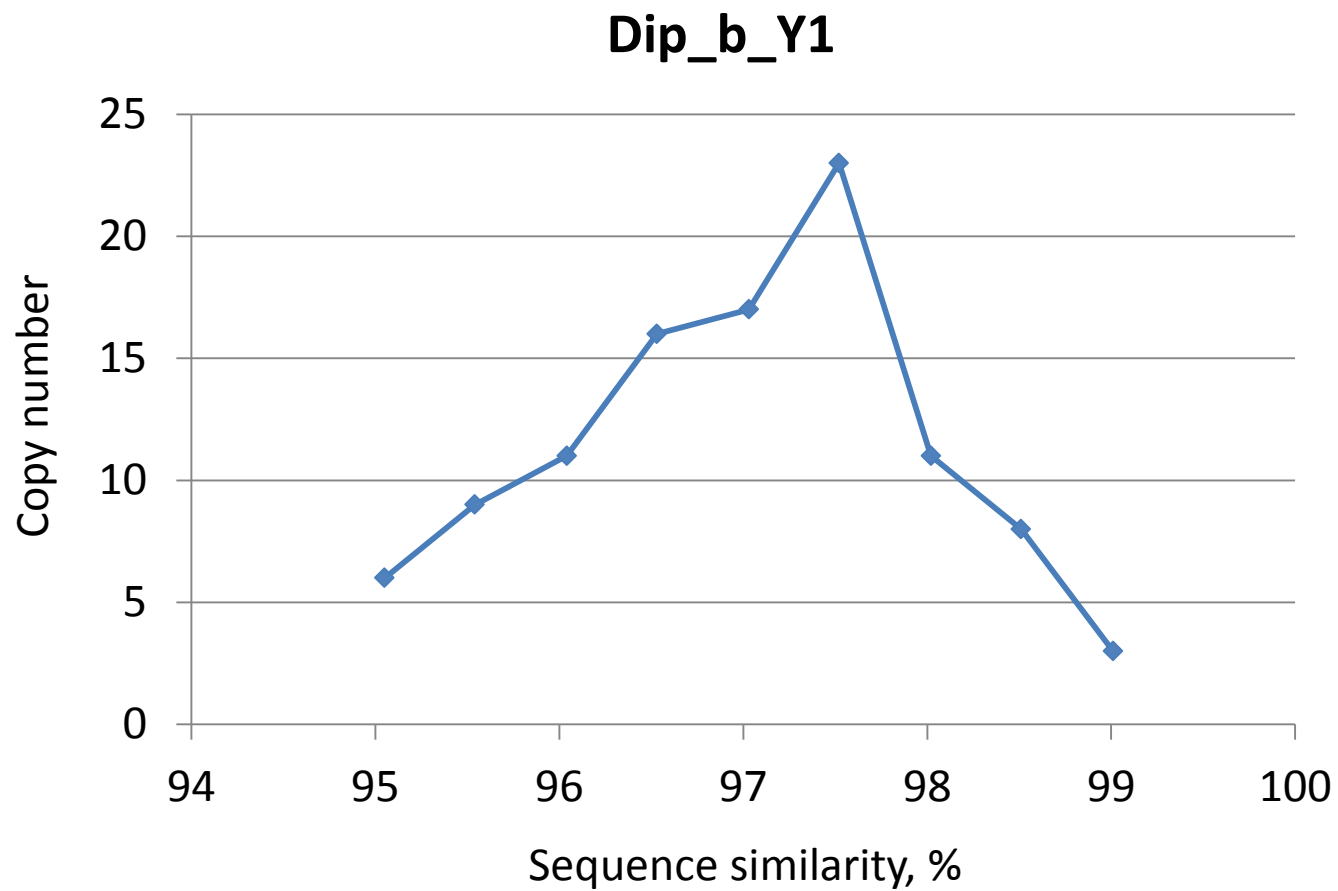

**Figure S18.** The similarity of copies from tribe Dip\_b\_Y1 to the tribe consensus.

Supplement: s1 [file s1]
